# Supplementary material for: Base-promoted isomerization of CF3-containing allylic alcohols to the corresponding saturated ketones under metal-free conditions
Source: publisher site journal article supplement (doi:10.3762/bjoc.13.149), 2017-08-01
Supplement: Additional file 1 [file 1860-5397-13-149-S1.pdf]

**Supporting Information**  
**for**  
**Base-promoted isomerization of CF<sub>3</sub>-containing allylic**  
**alcohols to the corresponding saturated ketones under**  
**metal-free conditions**

Yoko Hamada, Tomoko Kawasaki-Takasuka, and Takashi Yamazaki\*

Address: Division of Applied Chemistry, Institute of Engineering, Tokyo University of  
Agriculture and Technology, 2-24-16 Nakamachi, Koganei 184-8588, Japan

Email: Takashi Yamazaki - tyamazak@cc.tuat.ac.jp

\*Corresponding author

**Experimental procedures, characterization data, copies of <sup>1</sup>H and <sup>13</sup>C NMR  
spectra, HPLC charts for optically active compounds, and computational details**

|                                                                      |            |
|----------------------------------------------------------------------|------------|
| <b>1. General information .....</b>                                  | <b>S2</b>  |
| <b>2. Experimental procedures and characterization data .....</b>    | <b>S2</b>  |
| General method for the preparation of                                |            |
| Horner–Wadsworth–Emmons reagents .....                               | S2         |
| General method for the preparation of α,β-unsaturated ketones .....  | S4         |
| General procedure for the preparation of allylic alcohols .....      | S8         |
| General procedure for the preparation of                             |            |
| optically active allylic alcohols .....                              | S11        |
| General procedure for the isomerization of racemic allylic           |            |
| alcohols ( <i>E</i> )-6 to the corresponding saturated ketones ..... | S13        |
| <b>3. <sup>1</sup>H and <sup>13</sup>C NMR charts .....</b>          | <b>S17</b> |
| <b>4. HPLC charts .....</b>                                          | <b>S50</b> |
| <b>5. Computational details .....</b>                                | <b>S62</b> |
| <b>6. References .....</b>                                           | <b>S81</b> |

## 1. General information

$^1\text{H}$  (300.40 MHz),  $^{13}\text{C}$  (75.45 Hz), and  $^{19}\text{F}$  (282.65 Hz) NMR spectra were recorded on a JEOL AL 300 spectrometer in  $\text{CDCl}_3$  unless otherwise noted and chemical shifts were recorded in parts per million (ppm), downfield from internal tetramethylsilane ( $\text{Me}_4\text{Si}$ :  $\delta$  0.00, for  $^1\text{H}$  and  $^{13}\text{C}$ ) or hexafluorobenzene ( $\text{C}_6\text{F}_6$ :  $\delta$  -163.00 for  $^{19}\text{F}$ ). Data were tabulated in the following order: number of protons, multiplicity (s, singlet; d, doublet; t, triplet; q, quartet; quint, quintet; sex, sextet; m, multiplet; b, broad peak), coupling constants in Hertz. Infrared (IR) spectra were obtained on a JASCO A-302 spectrometer and reported in wave numbers ( $\text{cm}^{-1}$ ). Elemental analyses were performed by Perkin-Elmer SeriesII CHNS/O analyzer. JEOL JMS-700 was used for obtaining high resolution mass spectrometry data by the positive ionization mode.

Most of reactions where an organic solvent was employed were performed under argon with magnetic stirring using flame-dried glassware. Anhydrous THF,  $\text{Et}_2\text{O}$ , and  $\text{CH}_2\text{Cl}_2$  were purchased and used without further purification. Unless otherwise noted, materials were obtained from commercial suppliers and were used without further purification. Analytical thin-layer chromatography (TLC) was routinely used for monitoring reactions by generally using a mixture of hexane (Hex) and ethyl acetate (AcOEt) (v/v). Spherical neutral silica gel (63–210  $\mu\text{m}$  or 40–50  $\mu\text{m}$ ) was employed for column chromatography and flush chromatography, respectively.

## 2. Experimental procedures and characterization data

### General method for the preparation of Horner–Wadsworth–Emmons reagents: Dimethyl 2-oxo-2-phenylethylphosphonate (9a) [1]

To a 200 mL flame-dried three-necked flask under argon atmosphere were introduced 42.6 mL of BuLi (1.55 M, 66.0 mmol) and 9.7 mL of THF so as to control the concentration to ca 1 M, where 1,1,1,3,3,3-hexamethyldisilazane (14.0 mL, 66.0 mmol) was added slowly and stirring was continued for 15 min at room temperature. Dimethyl methylphosphonate (3.6 mL, 33 mmol) was added with keeping the temperature inside and then, ethyl benzoate (4.3 mL, 30 mmol) was added at lower than 5  $^\circ\text{C}$ . When complete consumption of ethyl benzoate was confirmed by TLC, the reaction mixture was quenched with water and extracted three times with AcOEt. The

combined AcOEt phase was further washed with water and brine successively, and dried over anhydrous  $\text{Na}_2\text{SO}_4$ . After filtration, evaporation of the volatiles afforded the crude material which was purified by silica gel column chromatography using AcOEt as an eluent to furnish 6.8 g of the title compound, dimethyl 2-oxo-2-phenylethylphosphonate **9a** was obtained (29.7 mmol, 99% yield) as a colorless oil.  $R_f = 0.43$  (AcOEt).  $^1\text{H}$  NMR:  $\delta$  3.65 (2H, d,  $J = 22.5$  Hz), 3.79 (6H, d,  $J = 11.1$  Hz), 7.46-7.52 (2H, m), 7.58-7.63 (1H, m), 7.99-8.02 (2H, m).  $^{13}\text{C}$  NMR:  $\delta$  37.1 (d,  $J = 130.9$  Hz), 52.8 (d,  $J = 6.9$  Hz), 128.5, 128.7, 133.6, 136.1 (d,  $J = 2.5$  Hz), 191.5 (d,  $J = 6.8$  Hz).

#### **Dimethyl 2-oxo-4-phenylbutylphosphonate (9b) [2]**

Ethyl 3-phenylpropionate (5.1 mL, 30.0 mmol) and diisopropylamine (9.3 mL, 66.0 mmol) were employed instead of ethyl benzoate and 1,1,1,3,3,3-hexamethyldisilazane, and 7.3 g of dimethyl 2-oxo-4-phenylbutylphosphonate **9b** was obtained (28.6 mmol, 95% yield) as a colorless oil.  $R_f = 0.30$  (AcOEt).  $^1\text{H}$  NMR:  $\delta$  2.88-3.00 (4H, m), 3.08 (2H, d,  $J = 22.8$  Hz), 3.75 (6H, d,  $J = 11.1$  Hz), 7.18-7.31 (5H, m).  $^{13}\text{C}$  NMR:  $\delta$  29.1, 41.2 (d,  $J = 127.8$  Hz), 45.3 (d,  $J = 1.8$  Hz), 52.8 (d,  $J = 6.8$  Hz), 125.9, 128.1, 128.2, 140.3, 200.7 (d,  $J = 6.2$  Hz).

#### **Dimethyl 2-oxobutylphosphonate (9c) [3]**

Ethyl propionate (3.4 mL, 30.0 mmol) was employed instead of ethyl benzoate, and 3.8 g of dimethyl 2-oxobutylphosphonate **9c** was obtained (19.6 mmol, 65% yield) as a colorless oil.  $R_f = 0.43$  (AcOEt).  $^1\text{H}$  NMR:  $\delta$  1.07 (3H, t,  $J = 7.2$  Hz), 2.66 (2H, q,  $J = 7.0$  Hz), 3.11 (2H, d,  $J = 22.5$  Hz), 3.79 (6H, d,  $J = 11.1$  Hz).  $^{13}\text{C}$  NMR:  $\delta$  7.2, 37.2 (d,  $J = 1.9$  Hz), 40.7 (d,  $J = 128.4$  Hz), 52.7 (d,  $J = 6.8$  Hz), 202.2 (d,  $J = 6.2$  Hz).

#### **Dimethyl 2-(4-methoxyphenyl)-2-oxoethylphosphonate (9d) [4]**

Ethyl *p*-anisate (5.4 g, 30.0 mmol) was employed instead of ethyl benzoate, and 7.4 g of dimethyl 2-(4-methoxyphenyl)-2-oxoethylphosphonate **9d** was obtained (28.8 mmol, 96% yield) as a colorless oil.  $R_f = 0.20$  (AcOEt).  $^1\text{H}$  NMR:  $\delta$  3.60 (2H, d,  $J = 55.5$  Hz), 3.78 (6H, d,  $J = 11.1$  Hz), 3.88 (3H, s), 6.93-6.98 (2H, m), 7.97-8.02 (2H, m).  $^{13}\text{C}$  NMR:  $\delta$  37.2 (d,  $J = 130.9$  Hz), 53.1 (d,  $J = 6.2$  Hz), 55.5, 113.8, 129.4, 131.4, 164.0, 190.0 (d,  $J = 8.1$  Hz).

#### **Dimethyl 2-(4-nitrophenyl)-2-oxoethylphosphonate (9e) [5]**

Ethyl 4-nitrobenzoate (2.0 g, 10.0 mmol) was employed instead of ethyl benzoate, and 2.1 g of dimethyl 2-(4-nitrophenyl)-2-oxoethylphosphonate **9e** was obtained (7.6

mmol, 76% yield) as a yellow-colored oil.  $R_f = 0.19$  (AcOEt).  $^1\text{H}$  NMR:  $\delta$  3.69 (2H, d,  $J = 23.1$  Hz), 3.81 (6H, d,  $J = 11.1$  Hz), 8.26-8.22 (2H, m), 8.32-8.37 (2H, m).  $^{13}\text{C}$  NMR:  $\delta$  37.8 (d,  $J = 130.2$  Hz), 53.1 (d,  $J = 6.8$  Hz), 123.6, 129.9, 140.3 (d,  $J = 1.9$  Hz), 150.3, 190.3 (d,  $J = 6.8$  Hz).

#### Dimethyl 2-(4-bromophenyl)-2-oxoethylphosphonate (**9f**)

Ethyl 4-bromobenzoate (6.9 g, 30.0 mmol) was employed instead of ethyl benzoate, and 9.0 g of dimethyl 2-(4-bromophenyl)-2-oxoethylphosphonate **9f** was obtained (29.4 mmol, 98% yield) as a colorless oil.  $R_f = 0.23$  (AcOEt).  $^1\text{H}$  NMR:  $\delta$  3.61 (2H, d,  $J = 22.5$  Hz), 3.79 (6H, d,  $J = 11.4$  Hz), 7.62-7.86 (2H, m), 7.87-7.89 (2H, m).  $^{13}\text{C}$  NMR:  $\delta$  36.6 (d,  $J = 130.2$  Hz), 52.4 (d,  $J = 6.2$  Hz), 128.3, 129.8, 131.2, 134.3 (d,  $J = 2.5$  Hz), 190.2 (d,  $J = 6.8$  Hz). IR (neat):  $\nu$  3466, 2997, 2956, 2853, 1682, 1586, 1568, 1486, 1462, 1397, 1256. HRMS (FAB+,  $m/z$ ):  $[\text{M}+2\text{H}]^+$  calcd for  $\text{C}_{10}\text{H}_{14}\text{BrO}_4\text{P}$ , 307.9813; Found, 307.9871.

#### General method for the preparation of $\alpha,\beta$ -unsaturated ketones: (*E*)-4,4,4-Trifluoro-1,3-diphenylbut-2-en-1-one ((*E*)-**10a**) [6,7,8,9]

To a flame-dried two-necked 200 mL flask containing ethyl trifluoroacetate (2.4 mL, 20.0 mmol) and 40.0 mL of  $\text{Et}_2\text{O}$  was added  $\text{PhMgBr}$  (prepared in  $\text{Et}_2\text{O}$ , 0.95 M, 21.0 mL, 20.0 mmol) under an argon atmosphere at  $-80^\circ\text{C}$ , then the mixture was stirred for 1 h at that temperature and another 1 h at  $0^\circ\text{C}$  with the aid of an ice bath where 1.8 mL of  $\text{H}_2\text{O}$  (100.0 mmol) was added.

To a different two-necked flask containing 2.8 g of lithium bromide (32.0 mmol) and THF (60 mL) were added 6.0 g of dimethyl 2-oxo-2-phenylethylphosphonate (26.0 mmol) and 3.8 mL of triethylamine (28.0 mmol) at  $0^\circ\text{C}$  under argon atmosphere, and the whole mixture was stirred for 10 min at room temperature. After cooling to  $0^\circ\text{C}$ , the above solution was introduced to this flask with the aid of cannula, and the resultant mixture was stirred for 5 h at  $40^\circ\text{C}$ . 1 M  $\text{HCl}$  aq. was added to this mixture which was further extracted three times with AcOEt. To the combined AcOEt phase was added anhydrous  $\text{MgSO}_4$  and after filtration, concentration and purification by silica gel chromatography (Hex:AcOEt = 20:1) furnished 4.1 g of the title compound (*E*)-**10a** (14.7 mmol, 73% yield, *E* only) as a yellow oil.  $R_f = 0.54$  (Hex:AcOEt = 4:1).  $^1\text{H}$  NMR:  $\delta$  7.27-7.28 (6H, m), 7.37-7.43 (2H, m), 7.50-7.56 (1H, m), 7.81-7.84 (2H, m).  $^{13}\text{C}$  NMR:  $\delta$  122.8 (q,  $J = 274.8$  Hz), 128.3, 128.6, 128.8, 129.0, 129.3, 130.8, 130.8 (q,  $J = 5.0$  Hz), 133.8, 136.0, 138.8 (q,  $J = 30.8$  Hz), 192.0.  $^{19}\text{F}$  NMR:  $\delta$   $-67.54$  (s).

#### **4,4,4-Trifluoro-3-(4-methoxyphenyl)-1-phenylbut-2-en-1-one (**10b**)** [6,7,8,9,10]

Dimethyl 2-oxo-2-phenylethylphosphonate (9.4 g, 39.0 mmol) and *p*-MeO-C<sub>6</sub>H<sub>4</sub>MgBr/THF were employed instead of dimethyl 2-oxo-2-phenylethylphosphonate and PhMgBr/Et<sub>2</sub>O, respectively, and chromatographic separation afforded the pure **10b** (*E* form: 4.9 g, 15.9 mmol, *Z* form: 0.74 g, 2.4 mmol, *E*:*Z* = 96:4).

**(E)-10b** Yield: 57% (yellow oil), *R*<sub>f</sub> = 0.40 (Hex:AcOEt = 10:1). <sup>1</sup>H NMR: δ 3.75 (3H, s), 6.78 (2H, dt, *J* = 9.3, 2.6 Hz), 7.20-7.21 (2H, m), 7.23 (1H, s), 7.38-7.43 (2H, m), 7.51-7.56 (1H, m), 7.82-7.85 (2H, m). <sup>13</sup>C NMR: δ 55.0, 113.8, 122.85, 122.92 (q, *J* = 274.4 Hz), 128.6, 128.9, 130.1 (q, *J* = 5.2 Hz), 130.4, 133.8, 135.9, 138.3 (q, *J* = 30.6 Hz), 160.3, 192.5. <sup>19</sup>F NMR: δ -67.55 (s).

**(Z)-10b** Yield: 9% (yellow oil), *R*<sub>f</sub> = 0.22 (*n*-Hex:AcOEt = 10:1). <sup>1</sup>H NMR: δ 3.85 (3H, s), 6.78 (1H, s), 6.97 (2H, d, *J* = 9.0 Hz), 7.48-7.54 (4H, m), 7.61-7.66 (1H, m), 7.98-8.01 (2H, m). <sup>13</sup>C NMR: δ 55.2, 114.1, 122.7 (q, *J* = 276.0 Hz), 125.6, 128.7, 129.0, 132.9 (q, *J* = 3.7 Hz), 134.0, 135.3 (q, *J* = 31.0 Hz), 135.64, 135.66, 160.6, 192.6. <sup>19</sup>F NMR: δ -60.58 (s). IR (neat): 2937, 2841, 1675, 1609, 1515, 1450, 1363, 1171, 1035, 834, 752. HRMS (FAB+, *m/z*): [M+H]<sup>+</sup> calcd for C<sub>17</sub>H<sub>14</sub>F<sub>3</sub>O, 307.0946; Found, 307.0970.

#### **(E)-4,4,4-Trifluoro-3-(4-fluorophenyl)-1-phenylbut-2-en-1-one ((E)-10c)** [8,10,11]

Dimethyl 2-oxo-2-phenylethylphosphonate (6.3 g, 27.5 mmol) and *p*-F-C<sub>6</sub>H<sub>4</sub>MgBr·LiBr/Et<sub>2</sub>O [12] were employed instead of dimethyl 2-oxo-2-phenylethylphosphonate and PhMgBr/Et<sub>2</sub>O, respectively, and chromatographic separation afforded 2.3 g of the pure **(E)-10c** (7.7 mmol, 37% yield, *E* only) as a yellow oil. *R*<sub>f</sub> = 0.34 (Hex: AcOEt = 15:1). <sup>1</sup>H NMR: δ 6.93-6.99 (2H, m), 7.23-7.30 (3H, m), 7.39-7.44 (2H, m), 7.53-7.58 (1H, m), 7.81-7.83 (2H, m). <sup>13</sup>C NMR: δ 115.5 (d, *J* = 21.7 Hz), 122.7 (qd, *J* = 274.2, 1.2 Hz), 126.7 (d, *J* = 3.7 Hz), 128.7, 128.8, 131.1 (d, *J* = 8.7 Hz), 131.2 (q, *J* = 4.9 Hz), 134.0, 135.9, 137.8 (q, *J* = 31.0 Hz), 163.2 (d, *J* = 249.3 Hz), 191.7. <sup>19</sup>F NMR: δ -67.86 (s), -112.34 to -112.48 (m).

#### **(E)-1-Phenyl-3-(trifluoromethyl)pent-2-en-1-one ((E)-10d)** [11]

Dimethyl 2-oxo-2-phenylethylphosphonate (9.4 g, 39.0 mmol) and EtMgBr /Et<sub>2</sub>O were employed instead of dimethyl 2-oxo-2-phenylethylphosphonate and PhMgBr/Et<sub>2</sub>O, respectively, and chromatographic separation afforded 4.3 g of the pure **(E)-10d** (18.8 mmol, 63% yield, *E* only) as a yellow oil. *R*<sub>f</sub> = 0.57 (Hex:AcOEt = 20:1). <sup>1</sup>H NMR: δ 1.20 (3H, t, *J* = 7.5 Hz), 2.57 (2H, q, *J* = 7.5 Hz), 7.22 (1H, q, *J* = 1.5 Hz), 7.49-7.54

(2H, m), 7.60-7.63 (1H, m), 7.93-7.96 (2H, m).  $^{13}\text{C}$  NMR:  $\delta$  13.4, 20.7, 123.8 (q,  $J$  = 274.8 Hz), 126.1 (q,  $J$  = 5.6 Hz), 128.5, 128.8, 133.7, 137.1, 144.6 (q,  $J$  = 28.5 Hz), 190.9.  $^{19}\text{F}$  NMR:  $\delta$  -69.77 (s).

**(*E*)-1,5-Diphenyl-3-(trifluoromethyl)pent-2-en-1-one ((*E*)-10e)**

Dimethyl 2-oxo-2-phenylethylphosphonate (9.4 g, 39.0 mmol) and  $\text{Ph}(\text{CH}_2)_2\text{MgBr}/\text{Et}_2\text{O}$  were employed instead of dimethyl 2-oxo-2-phenylethylphosphonate and  $\text{PhMgBr}/\text{Et}_2\text{O}$ , respectively, and chromatographic separation afforded 7.5 g of the pure (*E*)-10e (24.8 mmol, 83% yield, *E* only) as a yellow oil.  $R_f$  = 0.46 (Hex: AcOEt = 20:1).  $^1\text{H}$  NMR:  $\delta$  2.87 (4H, s), 7.13 (1H, sex,  $J$  = 4.2 Hz), 7.24-7.29 (5H, m), 7.46-7.52 (2H, m), 7.58-7.61 (1H, m), 7.87-7.90 (2H, m).  $^{13}\text{C}$  NMR:  $\delta$  29.4, 34.9, 123.7 (q,  $J$  = 274.8 Hz), 126.2, 126.9 (q,  $J$  = 5.6 Hz), 128.38, 128.43 (2C), 128.7, 133.7, 137.0, 140.5, 142.5 (q,  $J$  = 28.6 Hz), 190.6.  $^{19}\text{F}$  NMR:  $\delta$  -69.65 (s). IR (neat):  $\nu$  3064, 3030, 2944, 2872, 1676, 1597, 1496, 1450, 1233, 1126, 749, 701. Calcd for  $\text{C}_{18}\text{H}_{15}\text{F}_3\text{O}$ : C, 71.04; H, 4.97. Found: C, 71.33; H, 4.99.

**(*E*)-1-(4-Methoxyphenyl)-5-phenyl-3-(trifluoromethyl)pent-2-en-1-one ((*E*)-10f)**

Dimethyl 2-(4-methoxyphenyl)-2-oxoethylphosphonate (3.3 mg, 13 mmol) and  $\text{Ph}(\text{CH}_2)_2\text{MgBr}/\text{Et}_2\text{O}$  were employed instead of dimethyl 2-oxo-2-phenylethylphosphonate and  $\text{PhMgBr}/\text{Et}_2\text{O}$ , respectively, and chromatographic separation afforded 2.5 g of the pure (*E*)-10g (7.4 mmol, 78% yield, *E* only) as a white solid. mp 61.6 °C,  $R_f$  = 0.37 (Hex:AcOEt = 20:1).  $^1\text{H}$  NMR:  $\delta$  2.79-2.92 (4H, m), 3.90 (3H, s), 6.96 (2H, dt,  $J$  = 9.3, 2.4 Hz), 7.10-7.17 (1H, m), 7.21-7.26 (5H, m), 7.86-7.91 (2H, m).  $^{13}\text{C}$  NMR:  $\delta$  29.4, 35.0, 55.4, 113.9, 123.8 (q,  $J$  = 274.7 Hz), 126.1, 127.3 (q,  $J$  = 5.6 Hz), 128.3, 128.4, 130.1, 130.9, 140.7, 141.4 (q,  $J$  = 28.5 Hz), 164.0, 189.1.  $^{19}\text{F}$  NMR:  $\delta$  -69.56 (s). IR (KBr):  $\nu$  3070, 3030, 2974, 2938, 1752, 1673, 1636, 1595, 1509, 1456, 1264, 1054. Calcd for  $\text{C}_{19}\text{H}_{17}\text{F}_3\text{O}_2$ : C, 68.26; H, 5.13. Found: C, 68.50; H, 5.13.

**(*E*)-1-(4-Bromophenyl)-5-phenyl-3-(trifluoromethyl)pent-2-en-1-one ((*E*)-10g)**

Dimethyl 2-(4-bromophenyl)-2-oxoethylphosphonate (2.3 g, 7.4 mmol) and  $\text{Ph}(\text{CH}_2)_2\text{MgBr}/\text{Et}_2\text{O}$  were employed instead of dimethyl 2-oxo-2-phenylethylphosphonate and  $\text{PhMgBr}/\text{Et}_2\text{O}$ , respectively, and chromatographic separation afforded 1.8 g of the pure (*E*)-9g (4.7 mmol, 63% yield, *E* only) as a white solid. mp 55.7 °C,  $R_f$  = 0.31 (Hex:AcOEt = 20:1).  $^1\text{H}$  NMR:  $\delta$  2.88 (4H, s), 7.12 (1H, m), 7.21-7.23 (5H, m), 7.60-7.64 (2H, m), 7.70-7.75 (2H, m).  $^{13}\text{C}$  NMR:  $\delta$  29.3, 34.8, 123.6 (q,  $J$  = 274.7 Hz), 126.2, 126.3 (q,  $J$  = 5.4 Hz), 128.4, 128.5, 129.0, 129.9, 132.1, 135.7, 140.3, 143.2

(q,  $J = 29.2$  Hz), 189.5.  $^{19}\text{F}$  NMR:  $\delta -69.67$  (s). IR (KBr):  $\nu$  3301, 3087, 3032, 2943, 2873, 1919, 1664, 1586, 1136, 813, 703. Calcd for  $\text{C}_{18}\text{H}_{14}\text{BrF}_3\text{O}$ : C, 56.42; H, 3.68. Found: C, 56.81; H, 3.86.

#### **6,6,6-Trifluoro-1,5-diphenylhex-4-en-3-one (10h)**

Dimethyl 2-oxo-4-phenylbutylphosphonate (9.5 g, 37 mmol) was employed instead of dimethyl 2-oxo-2-phenylethylphosphonate, and chromatographic separation afforded 4.76 g of the pure **9h** (*E* form: 4.4 g, 14.5 mmol, *Z* form: 0.36 g, 1.2 mmol, *E*:*Z* = 93:7).

**(E)-10h** Yield: 51% (yellow oil),  $R_f = 0.42$  (Hex:AcOEt = 10:1).  $^1\text{H}$  NMR:  $\delta$  2.49-2.54 (2H, m), 2.74 (2H, t,  $J = 7.5$  Hz), 6.71 (1H, q,  $J = 1.4$  Hz), 6.95-6.98 (2H, m), 7.16-7.25 (5H, m), 7.36-7.48 (3H, m).  $^{13}\text{C}$  NMR:  $\delta$  29.2, 44.5, 122.7 (q,  $J = 274.1$  Hz), 126.0, 128.1, 128.3, 128.6, 128.9, 129.6, 130.7, 131.3 (q,  $J = 5.0$  Hz), 138.3 (q,  $J = 28.1$  Hz), 140.1, 200.6.  $^{19}\text{F}$  NMR:  $\delta -68.32$  (s). IR (neat):  $\nu$  3088, 3028, 2930, 1708, 1603, 1496, 1455, 1281, 1178, 749, 700. Calcd for  $\text{C}_{18}\text{H}_{15}\text{F}_3\text{O}$ : C, 71.04; H, 4.97. Found: C, 71.01; H, 4.96.

**(Z)-10h** Yield: 4% (yellow oil),  $R_f = 0.28$  (Hex:AcOEt = 10:1).  $^1\text{H}$  NMR:  $\delta$  2.99 (4H, s), 6.40 (1H, s), 7.21-7.39 (10H, m).  $^{13}\text{C}$  NMR:  $\delta$  29.2, 44.7 (q,  $J = 1.2$  Hz), 122.5 (q,  $J = 276.1$  Hz), 126.2, 127.6, 128.3, 128.5, 128.6, 129.4, 133.3, 134.6 (q,  $J = 31.6$  Hz), 135.9 (q,  $J = 3.7$  Hz), 140.3, 201.1.  $^{19}\text{F}$  NMR:  $\delta -60.38$  (s). IR (neat): 3029, 1710, 1604, 1496, 1454, 1364, 1282, 1169, 1132, 762, 698. HRMS (FAB+,  $m/z$ ):  $[\text{M}+\text{H}]^+$  calcd for  $\text{C}_{18}\text{H}_{16}\text{F}_3\text{O}$ , 305.1153; Found, 305.1179.

#### **(E)-6,6,6-Trifluoro-5-phenylhex-4-en-3-one ((E)-10i) [13]**

Dimethyl 2-oxobutylphosphonate (7.4 g, 39 mmol) was employed instead of dimethyl 2-oxo-2-phenylethylphosphonate, and chromatographic separation afforded 4.4 g of the pure **(E)-10i** (19.5 mmol, 66% yield, *E* only) as a yellow oil.  $R_f = 0.34$  (Hex:AcOEt = 20:1).  $^1\text{H}$  NMR:  $\delta$  0.91 (3H, t,  $J = 7.2$  Hz), 2.23 (2H, q,  $J = 7.2$  Hz), 6.75 (1H, s), 7.30-7.44 (5H, m).  $^{13}\text{C}$  NMR:  $\delta$  13.4, 20.7, 123.8 (q,  $J = 274.8$  Hz), 126.1 (q,  $J = 5.6$  Hz), 128.5, 128.8, 133.7, 137.1, 144.6 (q,  $J = 28.5$  Hz), 190.9.  $^{19}\text{F}$  NMR:  $\delta -68.39$  (s). IR (neat):  $\nu$  3734, 2981, 2941, 1711, 1496, 1409, 1281, 1179, 944, 770, 705. HRMS (FAB+,  $m/z$ ):  $[\text{M}]^+$  calcd for  $\text{C}_{12}\text{H}_{11}\text{F}_3\text{O}$ , 228.0762; Found, 228.0776.

#### **(E)-1,3-Diphenylbut-2-en-1-one ((E)-10j) [14,15]**

To a flame-dried two-necked 50 mL flask containing 0.58 mL of acetophenone

(5.0 mmol) and 10 mL of CH<sub>2</sub>Cl<sub>2</sub> were added TiCl<sub>4</sub> (0.60 mL, 5.5 mmol) and 1.4 mL of tributylamine (6.0 mmol), and the whole mixture was stirred for 30 min at room temperature. After addition of 0.58 mL of acetophenone (5.0 mmol) and stirring for 1 h at the same temperature, 2.0 mL of pyridine (25.0 mmol) was added and the mixture was stirred for 5 h at room temperature. Filtration of the reaction mixture after addition of Et<sub>2</sub>O and hexane (25 mL each) with the aid of Celite and concentration of the organic phase furnished crude mixture which was chromatographed on silica gel using a mixture of Hex:AcOEt = 10:1 as an eluent to give 0.35 g of the title compound (**(E)-9j**) (1.6 mmol, 32% yield, *E* only) as a yellow oil. R<sub>f</sub> = 0.57 (Hex:AcOEt = 6:1). <sup>1</sup>H NMR: δ 2.60 (s, 3H), 7.17 (s, 1H), 7.39-7.59 (m, 8H), 8.00-8.01 (m, 2H). <sup>13</sup>C NMR: δ 18.7, 121.9, 126.3, 128.1, 128.4, 128.5, 129.0, 132.4, 139.2, 142.6, 154.9, 191.2.

**General procedure for the preparation of allylic alcohols: racemic (*E*)-4,4,4-trifluoro-1,3-diphenylbut-2-en-1-ol ((*E*)-6a) [6,16,17,18]**

To a flame-dried 100 mL round-bottomed flask containing (*E*)-4,4,4-trifluoro-1,3-diphenylbut-2-en-1-one (**(E)-10a**) (2.8 g, 10.0 mmol) and MeOH (50 mL) was added at 0 °C 0.38 g of NaBH<sub>4</sub> (10.0 mmol) all at once and stirred the reaction for 10 min at the same temperature. After addition of water and evaporation of the volatiles, the mixture was extracted with AcOEt three times and the combined AcOEt phase was dried with anhydrous Na<sub>2</sub>SO<sub>4</sub> and concentrated. The resultant crude material was purified by silica gel column chromatography using a mixture of Hex:AcOEt = 4:1 as an eluent to afford 2.8 g of (**(E)-6a**) (10.0 mmol) in quantitative yield as a colorless oil. R<sub>f</sub> = 0.30 (Hex:AcOEt = 4:1). <sup>1</sup>H NMR: δ 1.94 (1H, d, *J* = 3.6 Hz), 5.14 (1H, dd, *J* = 9.3, 3.3 Hz), 6.61 (1H, dq, *J* = 9.2, 1.5 Hz), 7.28–7.45 (10H, m). <sup>13</sup>C NMR: δ 70.3, 123.1 (q, *J* = 272.1 Hz), 126.1, 128.3, 128.5, 128.8, 129.0, 129.6, 131.3, 132.0 (q, *J* = 30.1 Hz), 136.5 (q, *J* = 5.2 Hz), 141.5. <sup>19</sup>F NMR: δ –67.81 (s).

**(*E*)-4,4,4-Trifluoro-3-(4-methoxyphenyl)-1-phenylbut-2-en-1-ol ((*E*)-6b) [7,8,17,19]**

(*E*)-4,4,4-Trifluoro-3-(4-methoxyphenyl)-1-phenylbut-2-en-1-one (0.91 g, 3.0 mmol) was employed instead of (*E*)-4,4,4-trifluoro-1,3-diphenylbut-2-en-1-ol and chromatography on silica gel using a mixture of Hex:AcOEt = 3:1 as an eluent afforded the title compound 0.91 g of (**(E)-6b**) (2.9 mmol) in 96% yield as a colorless oil. R<sub>f</sub> = 0.49 (Hex:AcOEt = 3:1). <sup>1</sup>H NMR: δ 1.94 (1H, d, *J* = 3.6 Hz), 3.85 (3H, s), 5.17 (1H, dd, *J* = 9.3, 3.3 Hz), 6.58 (1H, dq, *J* = 9.3, 1.5 Hz), 6.92-6.97 (2H, m), 7.18-7.22 (2H,



m), 7.26-7.40 (5H, m).  $^{13}\text{C}$  NMR:  $\delta$  55.1, 70.3, 113.9, 123.3, 126.1, 126.8 (q,  $J$  = 281.0 Hz), 128.2, 128.8, 130.8, 131.6 (q,  $J$  = 32.0 Hz), 136.3 (q,  $J$  = 5.2 Hz), 141.6, 159.9.  $^{19}\text{F}$  NMR:  $\delta$  -67.97 (s).

**(*E*)-4,4,4-Trifluoro-3-(4-fluorophenyl)-1-phenylbut-2-en-1-ol ((*E*)-6c) [20,21]**

(*E*)-1-Phenyl-3-(trifluoromethyl)pent-2-en-1-one (2.1 g, 7.2 mmol) was employed instead of (*E*)-4,4,4-trifluoro-1,3-diphenylbut-2-en-1-ol and chromatography on silica gel using a mixture of Hex:AcOEt = 6:1 as an eluent afforded the title compound 2.1 g of (*E*)-6c (7.2 mmol) in 99% yield as a colorless oil.  $R_f$  = 0.29 (Hex:AcOEt = 6:1).  $^1\text{H}$  NMR:  $\delta$  2.05 (1H, s), 5.08 (1H, dd,  $J$  = 9.3, 2.1 Hz), 6.62 (1H, dq,  $J$  = 9.0, 1.8 Hz), 7.07-7.15 (2H, m), 7.22-7.39 (7H, m).  $^{13}\text{C}$  NMR:  $\delta$  70.4, 115.7 (d,  $J$  = 21.7 Hz), 122.9 (q,  $J$  = 273.6 Hz), 126.1 (d,  $J$  = 1.2 Hz), 127.1 (q,  $J$  = 3.7 Hz), 128.4, 128.9, 131.0 (q,  $J$  = 31.0 Hz), 131.5 (d,  $J$  = 8.7 Hz), 137.0 (q,  $J$  = 5.6 Hz), 141.3, 163.1 (d,  $J$  = 248.8 Hz).  $^{19}\text{F}$  NMR:  $\delta$  -67.99 (s), -113.23 to -113.32 (m). IR (neat):  $\nu$  3339, 2920, 1605, 1513, 1494, 1455, 1174, 1014, 930, 842, 700. HRMS (FAB+,  $m/z$ ):  $[\text{M}+\text{H}]^+$  calcd for  $\text{C}_{16}\text{H}_{13}\text{F}_4\text{O}$ , 297.0903; found, 297.0899.

**(*E*)-1-Phenyl-3-(trifluoromethyl)pent-2-en-1-ol ((*E*)-6d)**

(*E*)-1-Phenyl-3-(trifluoromethyl)pent-2-en-1-one (0.69 g, 3.0 mmol) was employed instead of (*E*)-4,4,4-trifluoro-1,3-diphenylbut-2-en-1-ol and chromatography on silica gel using a mixture of Hex:AcOEt = 3:1 as an eluent afforded the title compound 0.66 g of (*E*)-6d (2.9 mmol) in 96% yield as a colorless oil.  $R_f$  = 0.51 (Hex:AcOEt = 3:1).  $^1\text{H}$  NMR:  $\delta$  1.12 (3H, t,  $J$  = 7.7 Hz), 1.97 (1H, d,  $J$  = 3.6 Hz), 2.36 (2H, qd,  $J$  = 7.5, 2.1 Hz), 5.52 (1H, dd,  $J$  = 8.6, 2.9 Hz), 6.30 (1H, dq,  $J$  = 8.9, 1.4 Hz), 7.33-7.40 (5H, m).  $^{13}\text{C}$  NMR:  $\delta$  13.7, 19.3, 69.5, 124.2 (q,  $J$  = 273.6 Hz), 126.2, 128.2, 128.8, 132.2 (q,  $J$  = 28.1 Hz), 134.4 (q,  $J$  = 5.8 Hz), 141.7.  $^{19}\text{F}$  NMR:  $\delta$  -68.82 (s). IR (neat):  $\nu$  3324, 3033, 2980, 1455, 1321, 1254, 1175, 1121, 927, 699. Calcd for  $\text{C}_{12}\text{H}_{13}\text{F}_3\text{O}$ : C, 62.60; H, 5.69. Found: C, 62.49; H, 5.66.

**(*E*)-1,5-Diphenyl-3-(trifluoromethyl)pent-2-en-1-ol ((*E*)-6e)**

(*E*)-1,5-Diphenyl-3-(trifluoromethyl)pent-2-en-1-one (0.93 g, 3.0 mmol) was employed instead of (*E*)-4,4,4-trifluoro-1,3-diphenylbut-2-en-1-ol and chromatography on silica gel using a mixture of Hex:AcOEt = 3:1 as an eluent afforded the title compound 0.89 g of (*E*)-6e (2.9 mmol) in 95% yield as a colorless oil.  $R_f$  = 0.46 (Hex:AcOEt = 3:1).  $^1\text{H}$  NMR:  $\delta$  1.17 (1H, d,  $J$  = 3.3 Hz), 2.60-2.76 (2H, m), 2.84 (2H, td,  $J$  = 6.9 Hz), 5.08 (1H, dd,  $J$  = 9.0, 3.3 Hz), 6.25 (1H, d,  $J$  = 9.3 Hz), 7.22-7.38 (10H,

m).  $^{13}\text{C}$  NMR:  $\delta$  28.0, 34.5, 69.4, 124.3 (q,  $J = 274.0$  Hz), 125.9, 126.5, 128.1, 128.6, 128.7, 128.8, 129.1 (q,  $J = 27.9$  Hz), 136.4 (q,  $J = 5.8$  Hz), 140.6, 141.2.  $^{19}\text{F}$  NMR:  $\delta$  -67.81 (s). IR (neat):  $\nu$  3379, 3029, 2939, 1495, 1454, 1325, 1118, 903, 747, 699. Calcd for  $\text{C}_{18}\text{H}_{17}\text{F}_3\text{O}$ : C, 70.58; H, 5.59. Found: C, 70.48; H, 5.59.

**(*E*)-1-(4-Methoxyphenyl)-5-phenyl-3-(trifluoromethyl)pent-2-en-1-ol ((*E*)-6f)**

(*E*)-1-(4-Methoxyphenyl)-5-phenyl-3-(trifluoromethyl)pent-2-en-1-ol (1.9 g, 5.7 mmol) was employed instead of (*E*)-4,4,4-trifluoro-1,3-diphenylbut-2-en-1-ol and chromatography on silica gel using a mixture of Hex:AcOEt = 3:1 as an eluent afforded the title compound 1.8 g of (*E*)-6f (5.3 mmol) in 93% yield as a colorless oil.  $R_f$  = 0.43 (Hex:AcOEt = 3:1).  $^1\text{H}$  NMR:  $\delta$  1.15 (1H, d,  $J = 3.0$  Hz), 2.57-2.72 (2H, m), 2.82 (2H, t,  $J = 7.5$  Hz), 3.79 (3H, s), 5.03 (1H, dd,  $J = 9.0, 3.0$  Hz), 6.26 (1H, dq,  $J = 9.0, 1.5$  Hz), 6.84-6.89 (2H, m), 7.14-7.19 (2H, m), 7.22-7.29 (3H, m), 7.33-7.38 (2H, m).  $^{13}\text{C}$  NMR:  $\delta$  28.0, 34.5, 55.2, 69.1, 114.0, 124.3 (q,  $J = 273.6$  Hz), 126.5, 127.3, 128.50 (q,  $J = 28.5$  Hz), 128.54, 128.8, 133.4, 136.5 (q,  $J = 5.8$  Hz), 140.6, 159.3.  $^{19}\text{F}$  NMR:  $\delta$  -67.84 (s). IR (neat):  $\nu$  3375, 2938, 1611, 1513, 1455, 1252, 1164, 1116, 1035, 906, 833, 761. Calcd for  $\text{C}_{19}\text{H}_{19}\text{F}_3\text{O}_2$ : C, 67.85; H, 5.69. Found: C, 67.99; H, 5.64.

**(*E*)-1-(4-Bromophenyl)-5-phenyl-3-(trifluoromethyl)pent-2-en-1-ol ((*E*)-6g)**

(*E*)-1-(4-Bromophenyl)-5-phenyl-3-(trifluoromethyl)pent-2-en-1-ol (1.1 g, 3.0 mmol) was employed instead of (*E*)-4,4,4-trifluoro-1,3-diphenylbut-2-en-1-ol and chromatography on silica gel using a mixture of Hex:AcOEt = 4:1 as an eluent afforded the title compound 0.99 g of (*E*)-6g (2.6 mmol) in 86% yield as a colorless oil.  $R_f$  = 0.42 (Hex:AcOEt = 4:1).  $^1\text{H}$  NMR:  $\delta$  1.07-1.08 (1H, m), 2.61-2.94 (4H, m), 4.96 (1H, dd,  $J = 9.0, 3.0$  Hz), 6.14 (1H, dq,  $J = 9.3, 1.2$  Hz), 7.04-7.45 (9H, m).  $^{13}\text{C}$  NMR:  $\delta$  27.9, 34.4, 68.7, 121.9, 124.2 (q,  $J = 274.2$  Hz), 126.7, 127.5, 128.6, 129.0, 129.4, 131.7, 135.9 (q,  $J = 5.6$  Hz), 139.9, 140.4.  $^{19}\text{F}$  NMR:  $\delta$  -67.72 (s). IR (neat):  $\nu$  3556, 3392, 3028, 2934, 1487, 1454, 1326, 1187, 1163, 1119, 1011. Calcd for  $\text{C}_{18}\text{H}_{16}\text{BrF}_3\text{O}$ : C, 56.12; H, 4.19. Found: C, 56.33; H, 4.53.

**(*E*)-6,6,6-Trifluoro-1,5-diphenylhex-4-en-3-ol ((*E*)-6h)**

(*E*)-6,6,6-Trifluoro-1,5-diphenylhex-4-en-3-ol (0.91 g, 3.0 mmol) was employed instead of (*E*)-4,4,4-trifluoro-1,3-diphenylbut-2-en-1-ol and chromatography on silica gel using a mixture of Hex:AcOEt = 4:1 as an eluent afforded the title compound 0.92 g of (*E*)-6h (3.0 mmol) in quantitative yield as a colorless oil.  $R_f$  = 0.40 (Hex:AcOEt = 4:1).  $^1\text{H}$  NMR:  $\delta$  1.54 (1H, s), 1.76-1.99 (2H, m), 2.53-2.74 (2H, m), 4.09-4.17 (1H,

m), 6.40 (1H, dq,  $J = 7.5, 1.5$  Hz), 7.07-7.38 (10H, m).  $^{13}\text{C}$  NMR:  $\delta$  31.1, 38.1, 67.4, 123.0 (q,  $J = 270.7$  Hz), 125.9, 128.2, 128.4, 128.5, 128.8, 129.3, 131.3, 132.1 (q,  $J = 41.3$  Hz), 137.5 (q,  $J = 4.8$  Hz), 141.0.  $^{19}\text{F}$  NMR:  $\delta$  -67.79 (s). IR (neat):  $\nu$  3346, 3027, 2932, 2863, 1496, 1455, 1275, 1121, 750, 704. Calcd for  $\text{C}_{18}\text{H}_{17}\text{F}_3\text{O}$ : C, 70.58; H, 5.59. Found: C, 70.13; H, 5.79.

**(*E*)-6,6,6-Trifluoro-5-phenylhex-4-en-3-ol ((*E*)-6i)**

(*E*)-6,6,6-Trifluoro-5-phenylhex-4-en-3-one (0.68 g, 3.0 mmol) was employed instead of (*E*)-4,4,4-trifluoro-1,3-diphenylbut-2-en-1-ol and chromatography on silica gel using a mixture of Hex:AcOEt = 4:1 as an eluent afforded the title compound 0.64 g of (*E*)-6i (2.8 mmol) in 92% yield as a white solid. mp 33.9 °C,  $R_f = 0.40$  (Hex:AcOEt = 4:1).  $^1\text{H}$  NMR:  $\delta$  0.88 (3H, t,  $J = 7.5$  Hz), 1.47-1.67 (3H m), 4.00 (1H, m), 6.35 (1H, dq,  $J = 9.2, 1.5$  Hz), 7.24-7.27 (2H, m), 7.38-7.43 (3H, m).  $^{13}\text{C}$  NMR:  $\delta$  9.3, 29.7, 69.3, 123.1 (q,  $J = 272.6$  Hz), 128.5, 128.8, 129.5, 131.5, 132.3 (q,  $J = 29.4$  Hz), 137.4 (q,  $J = 4.8$  Hz).  $^{19}\text{F}$  NMR:  $\delta$  -67.89 (s). IR (KBr):  $\nu$  3313, 2977, 2936, 1174, 1119, 1058, 1014, 945, 903, 876, 774. Calcd for  $\text{C}_{12}\text{H}_{13}\text{F}_3\text{O}$ : C, 62.60; H, 5.69. Found: C, 62.78; H, 5.77.

**(*E*)-1,3-Diphenylbut-2-en-1-ol ((*E*)-6j) [22]**

(*E*)-1,3-Diphenylbut-2-en-1-one (0.22 g, 1.0 mmol) was employed instead of (*E*)-4,4,4-trifluoro-1,3-diphenylbut-2-en-1-ol and chromatography on silica gel using a mixture of Hex:AcOEt = 4:1 as an eluent afforded the title compound 0.19 g of (*E*)-6j (0.84 mmol) in 84% yield as a colorless oil.  $R_f = 0.2$  (*n*-Hex:AcOEt = 6:1).  $^1\text{H}$  NMR:  $\delta$  1.94 (1H, s), 2.21 (3H, d,  $J = 0.9$  Hz), 5.65 (1H, d,  $J = 8.4$  Hz), 6.01 (1H, dq,  $J = 8.4, 1.4$  Hz), 7.22-7.47 (10H, m).  $^{13}\text{C}$  NMR:  $\delta$  16.2, 70.8, 125.8, 125.9, 127.2, 127.3, 128.1, 128.4, 130.0, 136.7, 142.6, 143.6.

**General procedure for the preparation of optically active allylic alcohols [23,24]:**  
**(*R,E*)- 4,4,4-Trifluoro-1,3-diphenylbut-2-en-1-ol ((*R,E*)-6a) [7,8,17,19]**

To a flame-dried 30 mL two-necked flask under argon were added (*S*)-2-diphenyl-(pyrrolidin-2-yl)methanol (0.051 g, 0.20 mmol), phenylboronic acid (0.024 g, 0.20 mmol), and toluene (4 mL) and the mixture was refluxed for 4 h. After cooling to room temperature, (*E*)-4,4,4-trifluoro-1,3-diphenylbut-2-en-1-one (0.55 g, 2.0 mmol) was added where 2.2 mL of  $\text{BH}_3$  (1 M in THF, 2.2 mmol) was dropped slowly and the whole mixture was stirred for 15 min at room temperature. After quenched the

reaction with MeOH (2.0 mL), the mixture was extracted with Et<sub>2</sub>O three times, and the combined Et<sub>2</sub>O layer was successively washed with 1 M HCl, NaHCO<sub>3</sub> aq, and brine. After dried over anhydrous Na<sub>2</sub>SO<sub>4</sub>, evaporation of the volatiles and purification of the crude materials by silica gel column chromatography using a mixture of Hex:AcOEt = 6:1 as an eluent to obtain 0.52 g (1.9 mmol) of title compound **(R,E)-6a** in 93% yield as a colorless oil. The isolated product **(R,E)-6a** was further analyzed by HPLC possessing a CHIRALPAK OD column using a mixture of Hex:*i*-PrOH = 95:5 as an eluent with the flow rate of 0.500 mL/min to afford two peaks at 14.8 (major, (*R*)-isomer) and 17.4 (minor) min whose integration ratio allowed us to calculate the enantiomeric ratio as 86% *ee*.  $[\alpha]_D^{25} -190.3^\circ$  (*c* 1.00, CHCl<sub>3</sub>), and the other physical properties were identical to the ones of racemic form **(E)-6a**.

**(R,E)-4,4,4-Trifluoro-3-(4-methoxyphenyl)-1-phenylbut-2-en-1-ol ((R,E)-6b)**  
[7,20,21]

(*E*)-4,4,4-Trifluoro-3-(4-methoxyphenyl)-1-phenylbut-2-en-1-one (0.61 g, 2.0 mmol) was employed instead of (*E*)-4,4,4-trifluoro-1,3-diphenylbut-2-en-1-ol, and chromatographic purification using a mixture of Hex:AcOEt = 6:1 as an eluent afforded 0.58 g of the desired compound **(R,E)-6b** (1.9 mmol, 94% yield) as a colorless oil. HPLA analysis by the CHIRALPAK OD column with a mixture of Hex:*i*PrOH = 95:5 as an eluent with the flow rate of 0.500 mL/min allowed us to observe two peaks at 17.9 (major, (*R*)-isomer) and 23.9 (minor) min whose integration ratio allowed us to calculate the enantiomeric ratio as 84% *ee*.  $[\alpha]_D^{25} -197.3^\circ$  (*c* 1.00, CHCl<sub>3</sub>), and the other physical properties were identical to the ones of racemic form **(E)-6b**.

**(R,E)-4,4,4-Trifluoro-3-(4-fluorophenyl)-1-phenylbut-2-en-1-ol ((E)-6c)** [20,21]

(*E*)-4,4,4,-Trifluoro-3-(4-fluorophenyl)-1-phenylbut-2-en-1-one (0.29 g, 1.0 mmol) was employed instead of (*E*)-4,4,4-trifluoro-1,3-diphenylbut-2-en-1-ol, and chromatographic purification using a mixture of Hex:AcOEt = 6:1 as an eluent afforded 0.29 g of the desired compound **(R,E)-6c** (0.99 mmol, 97% yield) as a colorless oil. HPLA analysis by the CHIRALPAK OD column with a mixture of Hex:*i*PrOH = 95:5 as an eluent with the flow rate of 0.500 mL/min allowed us to observe two peaks at 14.9 (major, (*R*)-isomer) and 17.3 (minor) min whose integration ratio allowed us to calculate the enantiomeric ratio as 80% *ee*.  $[\alpha]_D^{25} -176.9^\circ$  (*c* 1.00, CHCl<sub>3</sub>), and the other physical properties were identical to the ones of racemic form **(E)-6c**.

**General procedure for the isomerization of racemic allylic alcohols (*E*)-6 to the corresponding saturated ketones 7: 4,4,4-Trifluoro-1,3-diphenylbutan-1-one (7a) [19,25,26,27]**

To a flame-dried 30 mL round-bottomed flask were added under argon 0.14 g of (*E*)-4,4,4-trifluoro-1,3-diphenylbut-2-en-1-ol (*E*)-6a (0.50 mmol), 0.039 g of DBU (0.25 mmol), and 5.0 mL of toluene and the whole mixture was refluxed for 3 h. The mixture was extracted with AcOEt three times and the combined organic phase was dried over anhydrous Na<sub>2</sub>SO<sub>4</sub>. Filtration and concentration afforded crude materials which was chromatographed on silica gel using a mixture of Hex:AcOEt = 6:1 as an eluent to give 0.13 g of the pure title compound 7a (0.46 mmol, 91% yield) as a white solid. R<sub>f</sub> = 0.43 (Hex:AcOEt = 10:1). <sup>1</sup>H NMR: δ 3.60 (1H, dd, *J* = 17.7, 4.2 Hz), 3.71 (1H, dd, *J* = 17.9, 8.9 Hz), 4.25 (1H, m), 7.28-7.41 (5H, m), 7.43-7.49 (2H, m), 7.55-7.61 (1H, m), 7.91-7.94 (2H, m). <sup>13</sup>C NMR: δ 38.2 (d, *J* = 1.2 Hz), 44.7 (q, *J* = 27.5 Hz), 126.9 (q, *J* = 278.9 Hz), 128.0, 128.2, 128.6, 129.0, 133.5, 134.5 (q, *J* = 1.9 Hz), 136.1, 195.2. <sup>19</sup>F NMR: δ -70.95 (d, *J* = 9.0 Hz).

**4,4,4-Trifluoro-3-(4-methoxyphenyl)-1-phenylbutan-1-one (7b) [19,26]**

(*E*)-4,4,4-Trifluoro-3-(4-methoxyphenyl)-1-phenylbut-2-en-1-ol (*E*)-6b (0.15 g, 0.50 mmol) was reacted for 3 h instead of 4,4,4-trifluoro-1,3-diphenylbutan-1-one (*E*)-6a and chromatographic purification using a mixture of Hex:AcOEt = 6:1 as an eluent afforded 0.14 g of the desired product (0.45 mmol, 89% yield) as a white solid. R<sub>f</sub> = 0.57 (Hex:AcOEt = 6:1). <sup>1</sup>H NMR: δ 3.56 (1H, dd, *J* = 17.7, 4.2 Hz), 3.67 (1H, dd, *J* = 18.0, 9.0 Hz), 3.78 (3H, s), 4.12-4.26 (1H, m), 6.84-6.89 (2H, m), 7.25-7.32 (2H, m), 7.43-7.49 (2H, m), 7.55-7.61 (1H, m), 7.91-7.94 (2H, m). <sup>13</sup>C NMR: δ 38.2, 43.9 (q, *J* = 27.3 Hz), 55.0, 114.0, 126.4, 127.0 (q, *J* = 278.5 Hz), 128.0, 128.6, 130.0, 133.4, 136.2, 159.3, 195.3. <sup>19</sup>F NMR: δ -71.35 (d, *J* = 9.0 Hz).

**4,4,4-Trifluoro-3-(4-fluorophenyl)-1-phenylbutan-1-one (7c) [26,28]**

(*E*)-4,4,4-Trifluoro-3-(4-fluorophenyl)-1-phenylbut-2-en-1-ol (*E*)-6c (0.15 g, 5.0 mmol) was reacted for 2 h instead of 4,4,4-trifluoro-1,3-diphenylbutan-1-one (*E*)-6a and chromatographic purification using a mixture of Hex:AcOEt = 6:1 as an eluent afforded 0.15 g of the desired product (0.50 mmol, quantitative yield) as a white solid. R<sub>f</sub> = 0.43 (Hex:AcOEt = 6:1). <sup>1</sup>H NMR: δ 3.54-3.72 (2H, m), 4.16-4.30 (1H, m), 7.03 (2H, t, *J* = 8.7 Hz), 7.35-7.61 (5H, m), 7.92 (2H, d, *J* = 7.2 Hz). <sup>13</sup>C NMR: δ 38.3 (q, *J* = 1.3 Hz), 44.1 (q, *J* = 27.3 Hz), 115.6 (d, *J* = 21.7 Hz), 126.8 (qd, *J* = 279.1, 1.3 Hz), 128.0, 128.7, 130.3 (dq, *J* = 3.8, 1.9 Hz), 130.7 (d, *J* = 8.1 Hz), 133.6, 136.2, 162.6 (d, *J*

= 246.9 Hz), 195.1.  $^{19}\text{F}$  NMR:  $\delta$  -71.17 (dd,  $J$  = 9.0, 4.5 Hz), -114.97 to -115.08 (m).

#### **1-Phenyl-3-(trifluoromethyl)pentan-1-one (7d) [29,30]**

(*E*)-1-Phenyl-3-(trifluoromethyl)pent-2-en-1-ol (**E**)-**6d** (0.12 g, 0.51 mmol) was reacted for 24 h instead of 4,4,4-trifluoro-1,3-diphenylbutan-1-one (**E**)-**6a** and chromatographic purification using a mixture of Hex:AcOEt = 10:1 as an eluent afforded 0.092 g of the desired product (0.40 mmol, 78% yield) as a colorless oil.  $R_f$  = 0.56 (Hex:AcOEt = 10:1).  $^1\text{H}$  NMR:  $\delta$  1.00 (3H, t,  $J$  = 7.5 Hz), 1.46-1.60 (1H, m), 1.70-1.84 (1H, m), 2.93-3.31 (2H, m), 3.22-3.31 (1H, m), 7.47-7.52 (2H, m), 7.58-7.64 (1H, m), 7.96-7.99 (2H, m).  $^{13}\text{C}$  NMR:  $\delta$  11.3, 21.7 (q,  $J$  = 2.5 Hz), 36.7 (q,  $J$  = 2.3 Hz), 39.3 (q,  $J$  = 25.6 Hz), 128.0, 128.3 (q,  $J$  = 279.1 Hz), 128.7, 133.5, 136.4, 196.5.  $^{19}\text{F}$  NMR:  $\delta$  -71.94 (d,  $J$  = 9.0 Hz). IR (neat):  $\nu$  3742, 2940, 1691, 1598, 1450, 1257, 1171, 957, 753, 715, 691. HRMS (FAB+,  $m/z$ ):  $[\text{M}+\text{H}]^+$  calcd for  $\text{C}_{12}\text{H}_{14}\text{F}_3\text{O}$ , 231.0997; Found, 231.1038.

#### **1,5-Diphenyl-3-(trifluoromethyl)pentan-1-one (7e)**

(*E*)-1,5-Diphenyl-3-(trifluoromethyl)pent-2-en-1-ol (**E**)-**6e** (0.15 g, 5.0 mmol) was reacted for 24 h instead of 4,4,4-trifluoro-1,3-diphenylbutan-1-one (**E**)-**6a** and chromatographic purification using a mixture of Hex:AcOEt = 10:1 as an eluent afforded 0.14 g of the desired product (0.46 mmol, 93% yield) as a colorless oil.  $R_f$  = 0.47 (Hex:AcOEt = 10:1).  $^1\text{H}$  NMR:  $\delta$  1.72-1.84 (1H, m), 1.97-2.10 (1H, m), 2.65-2.81 (2H, m), 3.05-3.38 (3H, m), 7.16-7.21 (3H, m), 7.25-7.30 (2H, m), 7.46-7.52 (2H, m), 7.58-7.63 (1H, m), 7.95-7.99 (2H, m).  $^{13}\text{C}$  NMR:  $\delta$  30.7 (q,  $J$  = 2.1 Hz), 33.2, 37.2 (q,  $J$  = 2.3 Hz), 38.0 (q,  $J$  = 26.3 Hz), 126.1, 128.0, 128.2 (q,  $J$  = 278.9 Hz), 128.2, 128.4, 128.7, 133.5, 136.2, 141.0, 196.2.  $^{19}\text{F}$  NMR:  $\delta$  -71.90 (d,  $J$  = 9.0 Hz). IR (neat):  $\nu$  3063, 3029, 2937, 1690, 1598, 1581, 1497, 1450, 1113, 1002, 754, 691. HRMS (ESI+,  $m/z$ ):  $[\text{M}+\text{Na}]^+$  calcd for  $\text{C}_{18}\text{H}_{17}\text{F}_3\text{NaO}$ , 329.1129; Found, 329.1124.

#### **1-(4-Methoxyphenyl)-5-phenyl-3-(trifluoromethyl)pentan-1-one (7f)**

(*E*)-1-(4-Methoxyphenyl)-5-phenyl-3-(trifluoromethyl)pent-2-en-1-ol (**E**)-**6f** (0.17 g, 5.0 mmol) was reacted for 48 h instead of 4,4,4-trifluoro-1,3-diphenylbutan-1-one (**E**)-**6a** and chromatographic purification using a mixture of Hex:AcOEt = 6:1 as an eluent afforded 0.13 g of the desired product (0.38 mmol, 76% yield) as a yellow oil.  $R_f$  = 0.26 (Hex:AcOEt = 6:1).  $^1\text{H}$  NMR:  $\delta$  1.71-1.83 (1H, m), 1.96-2.08 (1H, m), 2.64-2.81 (2H, m), 3.04 (1H, dd,  $J$  = 17.0, 7.7 Hz), 3.11-3.20 (1H, m), 3.27 (1H, dd,  $J$  = 16.7, 3.5 Hz), 3.89 (3H, s), 6.91-6.97 (2H, m), 7.15-7.30 (5H, m), 7.92-7.97 (2H, m).

<sup>13</sup>C NMR:  $\delta$  30.8 (q,  $J$  = 1.8 Hz), 33.2, 36.8 (q,  $J$  = 1.9 Hz), 38.1 (q,  $J$  = 26.0 Hz), 55.5, 113.8, 126.1, 128.3, 128.3 (q,  $J$  = 279.1 Hz), 128.4, 129.4, 130.3, 141.1, 163.8, 194.7. <sup>19</sup>F NMR:  $\delta$  -71.86 (d,  $J$  = 9.3 Hz). IR (neat):  $\nu$  3749, 3733, 1683, 1602, 1576, 1510, 1263, 983, 938, 833, 762. Calcd for C<sub>19</sub>H<sub>19</sub>F<sub>3</sub>O<sub>2</sub>: C, 67.85; H, 5.69. Found: C, 68.11; H, 6.03.

#### **1-(4-Bromophenyl)-5-phenyl-3-(trifluoromethyl)pentan-1-one (7g)**

(*E*)-1-(4-Bromophenyl)-3-trifluoromethyl-5-phenylpent-2-en-1-ol (***E***-6g) (0.19 g, 0.50 mmol) was reacted for 3 h instead of 4,4,4-trifluoro-1,3-diphenylbutan-1-one (***E***-6a) and chromatographic purification using a mixture of Hex:AcOEt = 6:1 as an eluent afforded 0.18 g of the desired product (0.46 mmol, 91% yield) as a colorless oil.  $R_f$  = 0.62 (Hex:AcOEt = 6:1). <sup>1</sup>H NMR:  $\delta$  1.76-1.81 (1H, m), 2.00-2.01 (1H, m), 2.69-2.76 (2H, m), 3.02 (1H, dd,  $J$  = 17.4, 7.2 Hz), 3.06-3.18 (1H, m), 3.27 (1H, dd,  $J$  = 17.1, 3.6 Hz), 7.15-7.30 (5H, m), 7.60-7.64 (2H, m), 7.78-7.83 (2H, m). <sup>13</sup>C NMR:  $\delta$  30.5 (q,  $J$  = 2.1 Hz), 33.1, 37.2 (q,  $J$  = 2.3 Hz), 38.0 (q,  $J$  = 26.3 Hz), 126.1, 128.1 (q,  $J$  = 279.2 Hz), 128.2, 128.4, 128.7, 129.5, 132.0, 134.9, 140.8, 195.2. <sup>19</sup>F NMR:  $\delta$  -71.86 (d,  $J$  = 9.3 Hz). IR (neat):  $\nu$  3029, 2934, 1692, 1586, 1397, 1264, 1151, 1112, 1010, 813, 753. Calcd for C<sub>18</sub>H<sub>16</sub>BrF<sub>3</sub>O: C, 56.12; H, 4.19. Found: C, 56.45; H, 4.61.

#### **(*R*)-4,4,4-Trifluoro-1,3-diphenylbutan-1-one ((*R*)-7a) [6,7,16,17,20,31]**

(*R,E*)-4,4,4-Trifluoro-1,3-diphenylbut-2-en-1-ol (***R,E***-6a) (0.25 g, 0.91 mmol, 83% *ee*) was reacted for 3 h instead of its racemate (***E***-6a) and the same reaction procedure afforded 0.22 g of the title compound (***R***-7a) (0.80 mmol, 89% yield) as a white solid. The isolated product (***R***-7a) was further analyzed by HPLC possessing a CHIRALPAK AD column using a mixture of Hex:iPrOH = 300:1 as an eluent with the flow rate of 1.00 mL/min to afford two peaks at 12.8 (minor) and 15.6 (major, (*R*)-isomer) min whose integration ratio allowed us to calculate the enantiomeric ratio as 85% *ee*.  $[\alpha]_D^{20}$  +22.0° (c 1.02, CCl<sub>4</sub>), and the other physical properties were identical to the ones of the corresponding racemic compound.

#### **(*R*)-4,4,4-Trifluoro-3-(4-methoxyphenyl)-1-phenylbutan-1-one (7b) [7,20,31]**

(*R,E*)-4,4,4-Trifluoro-3-(4-methoxyphenyl)-1-phenylbut-2-en-1-ol (***R,E***-6b) (0.27 g, 0.87 mmol, 80% *ee*) was used instead of (*E*)-4,4,4-Trifluoro-1,3-diphenylbut-2-en-1-ol (***E***-6a) and the same reaction procedure afforded 0.23 g of the title compound (***R***-7b) (0.74 mmol, 85% yield) as a white solid. The isolated product (***R***-7b) was further analyzed by HPLC possessing a CHIRALPAK AD column using a mixture of

Hex:*i*-PrOH = 100:1 as an eluent with the flow rate of 1.00 mL/min to afford two peaks at 14.1 (minor) and 20.6 (major, (*R*)-isomer) min whose integration ratio allowed us to calculate the enantiomeric ratio as 77% *ee*.  $[\alpha]_{\text{D}}^{20} +24.2^{\circ}$  (c 1.04, CCl<sub>4</sub>), and the other physical properties were identical to the ones of the corresponding racemic compound.

**4,4,4-Trifluoro-3-(4-fluorophenyl)-1-phenylbut-2-en-1-ol (**7c**) [31]**

(*R,E*)-4,4,4-Trifluoro-3-(4-fluorophenyl)-1-phenylbut-2-en-1-ol (***R,E*-6c**) (0.25 g, 0.86 mmol, 80% *ee*) was used instead of (*E*)-4,4,4-trifluoro-1,3-diphenylbut-2-en-1-ol (***E*-6a**) and the same reaction procedure afforded 0.22 g of the title compound (***R*-7c**) (0.76 mmol, 88% yield) as a white solid. The isolated product (***R*-7c**) was further analyzed by HPLC possessing a CHIRALPAK AD column using a mixture of Hex:*i*-PrOH = 100:1 as an eluent with the flow rate of 1.00 mL/min to afford two peaks at 14.6 (minor) and 20.6 (major, (*R*)-isomer) min whose integration ratio allowed us to calculate the enantiomeric ratio as 78% *ee*.  $[\alpha]_{\text{D}}^{20} +25.8^{\circ}$  (c 1.01, CCl<sub>4</sub>), and the other physical properties were identical to the ones of the corresponding racemic compound.



### 3. $^1\text{H}$ and $^{13}\text{C}$ NMR charts

#### Dimethyl 2-oxo-2-phenylethylphosphonate (9a)

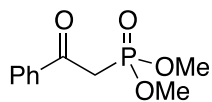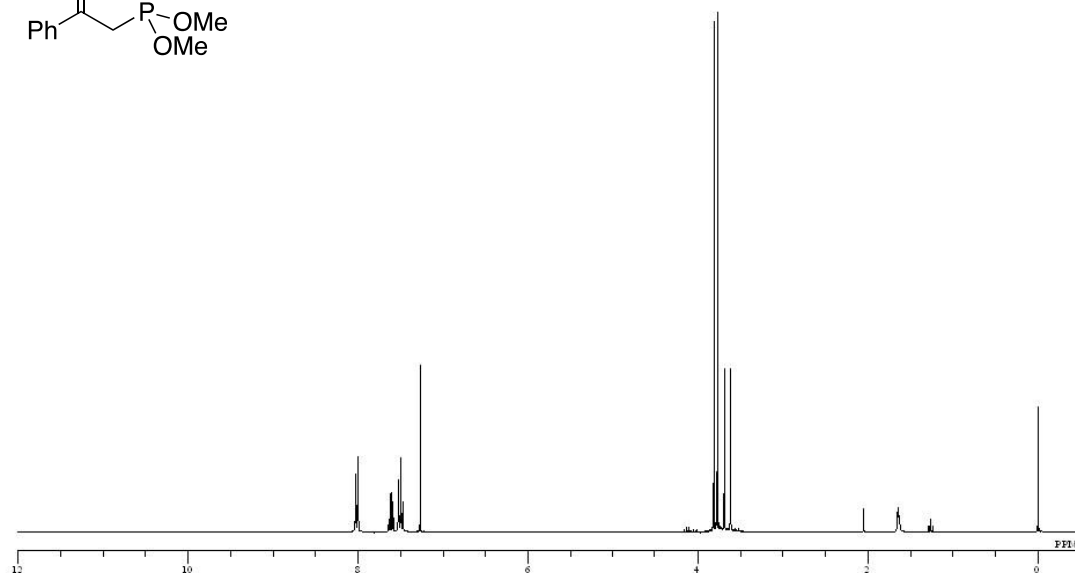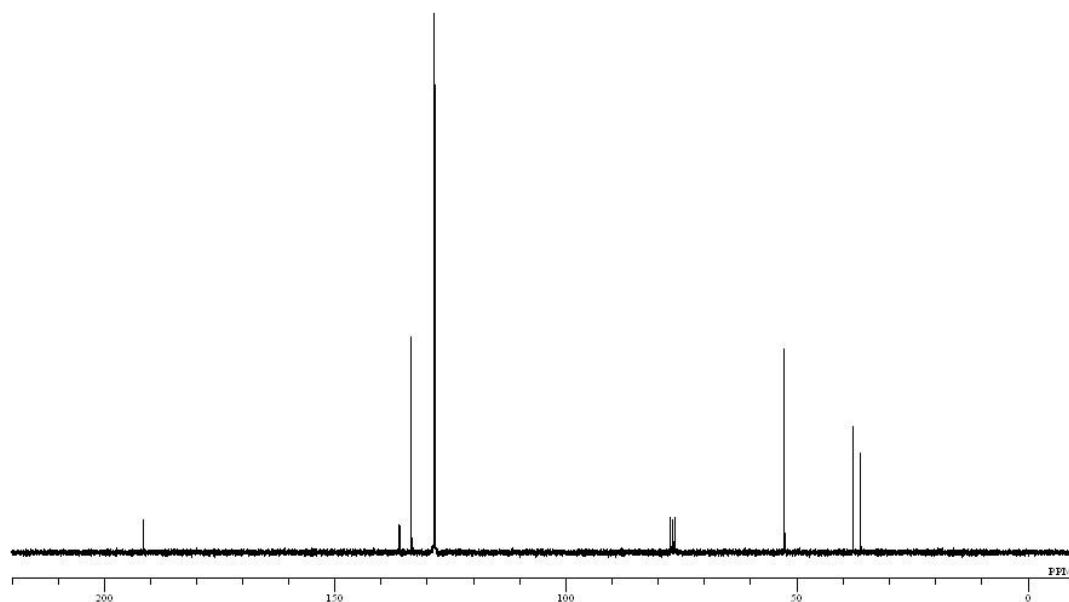

**Dimethyl 2-oxo-4-phenylbutylphosphonate (9b)**

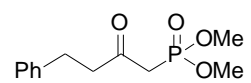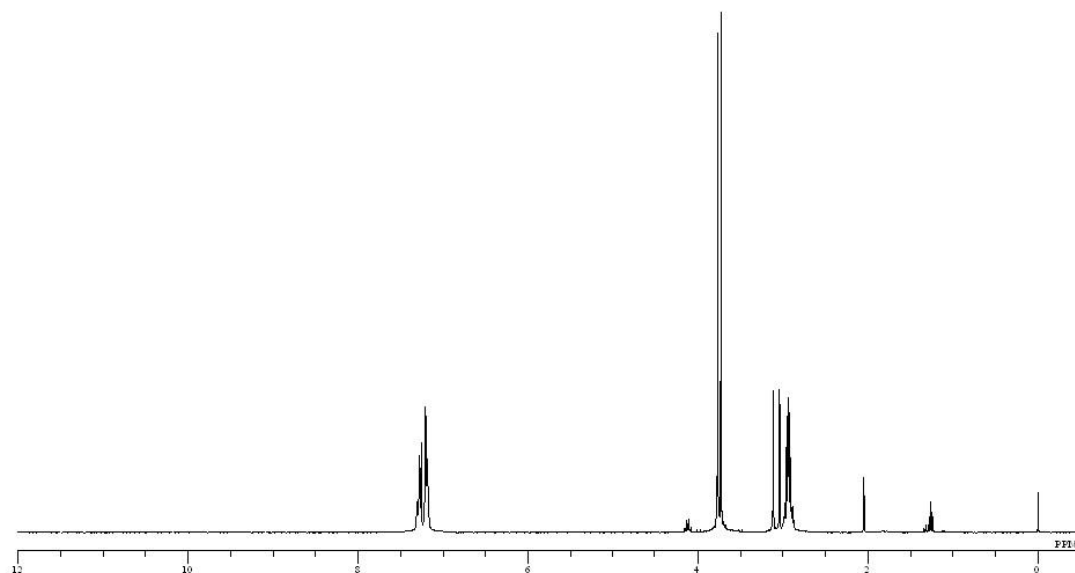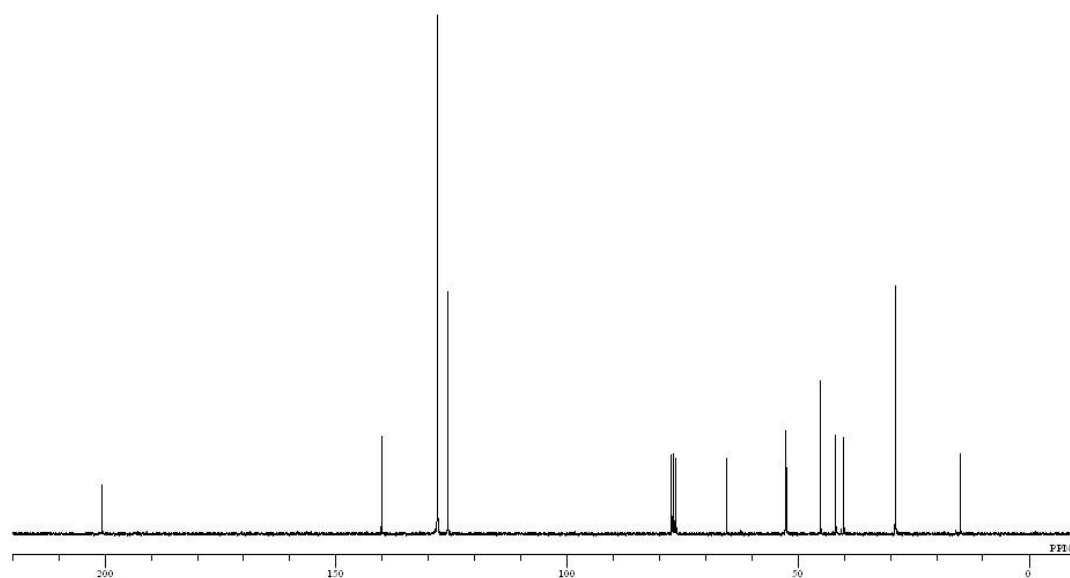

**Dimethyl 2-oxobutylphosphonate (9c)**

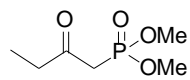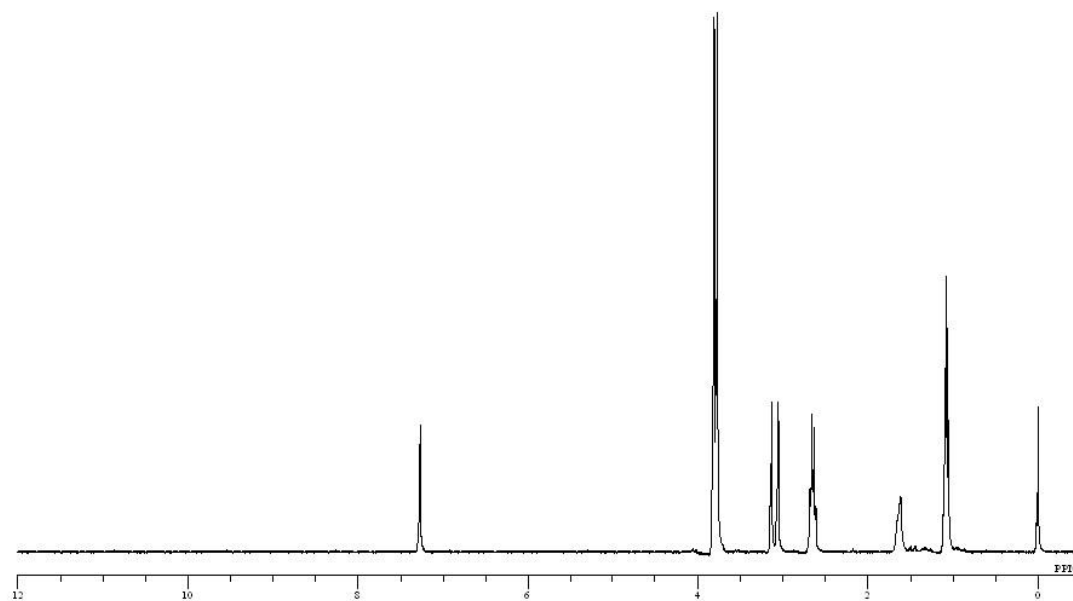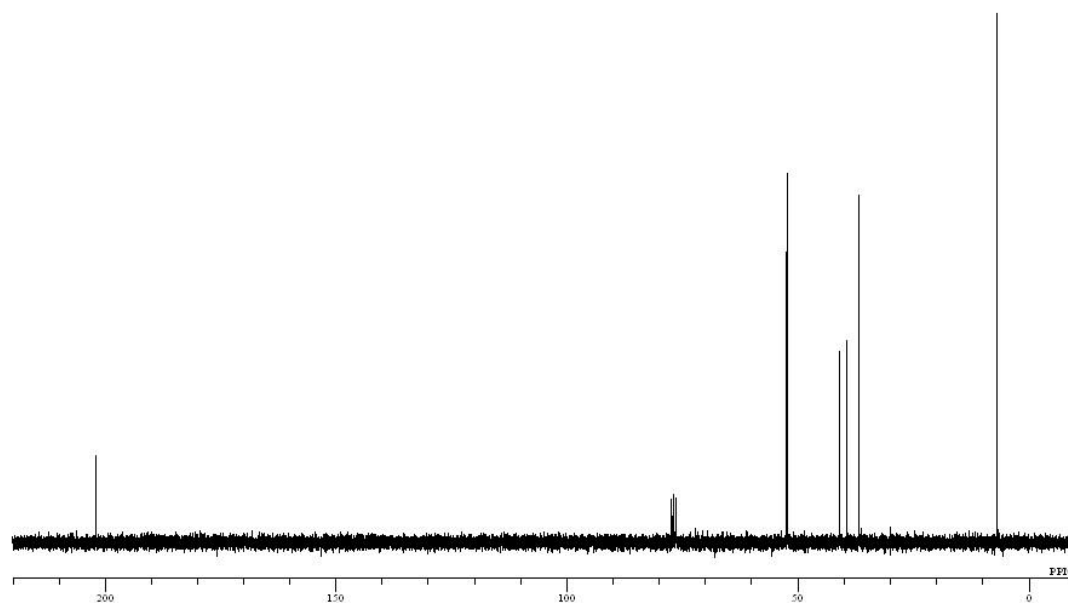

**Dimethyl 2-(4-methoxyphenyl)-2-oxoethylphosphonate (9d)**

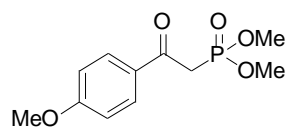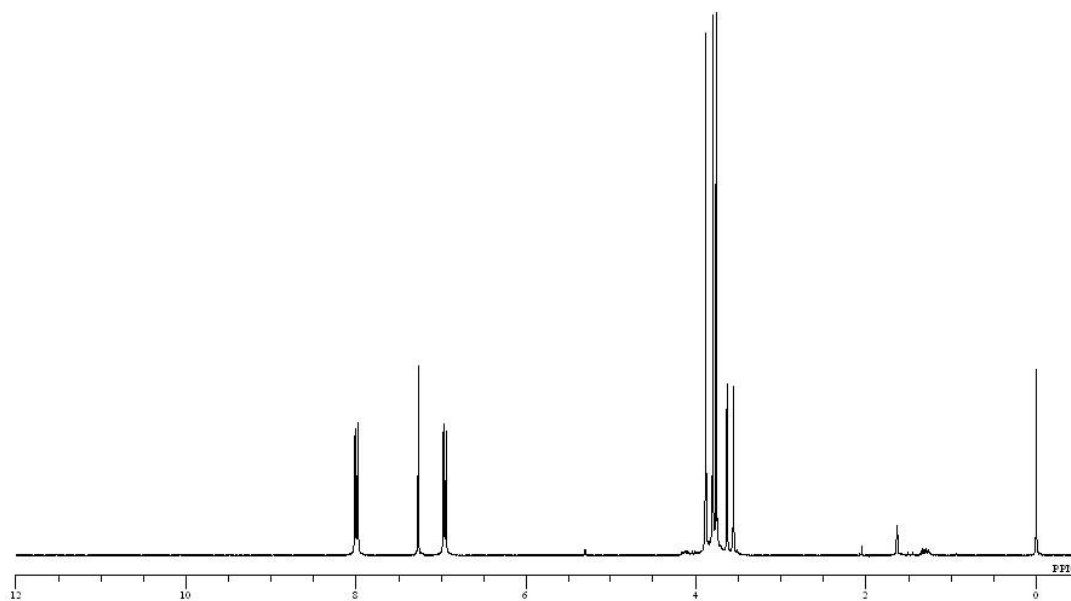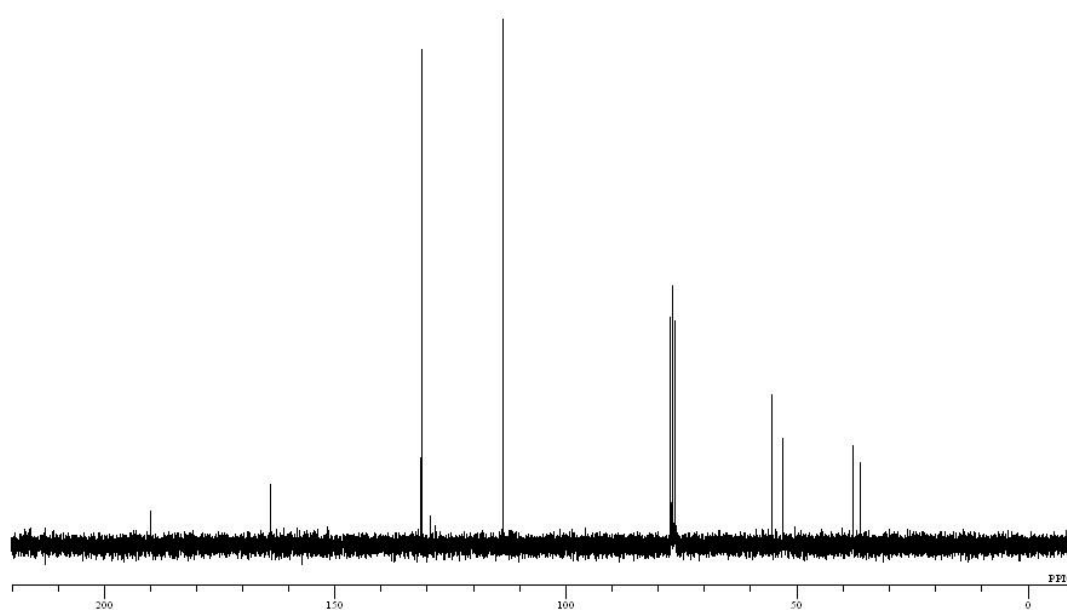

**Dimethyl 2-(4-nitrophenyl)-2-oxoethylphosphonate (9e)**

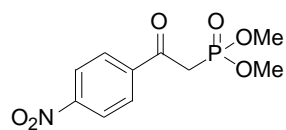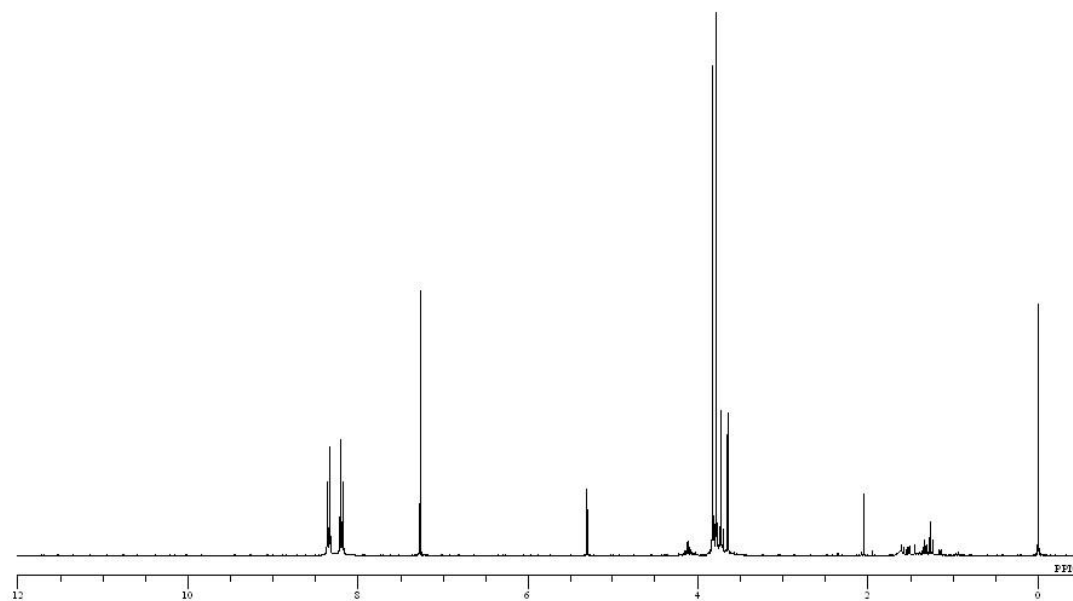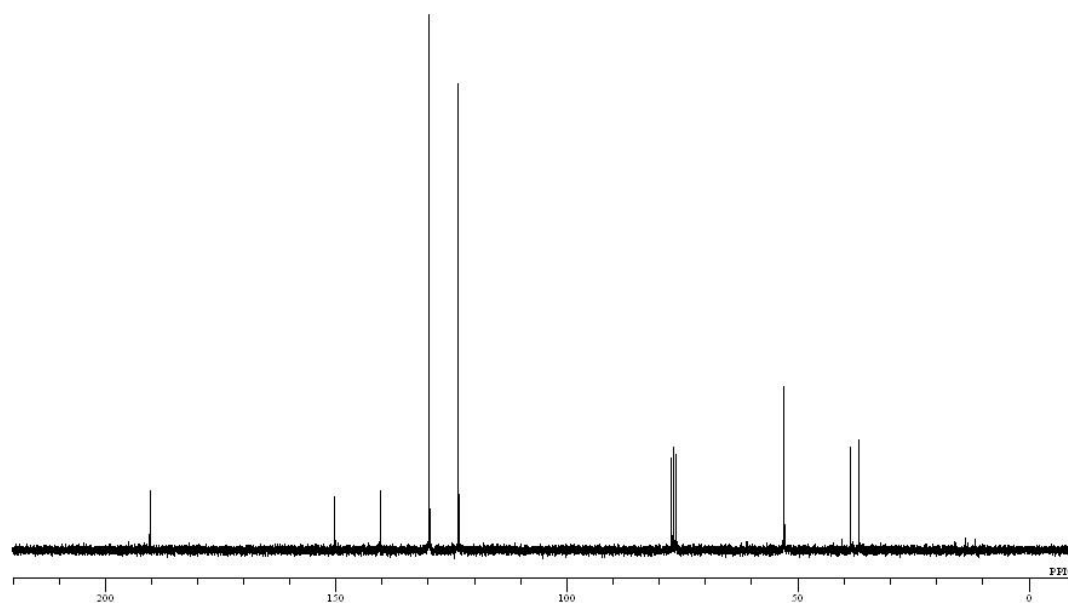

**Dimethyl 2-(4-bromophenyl)-2-oxoethylphosphonate (9f)**

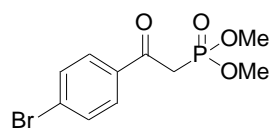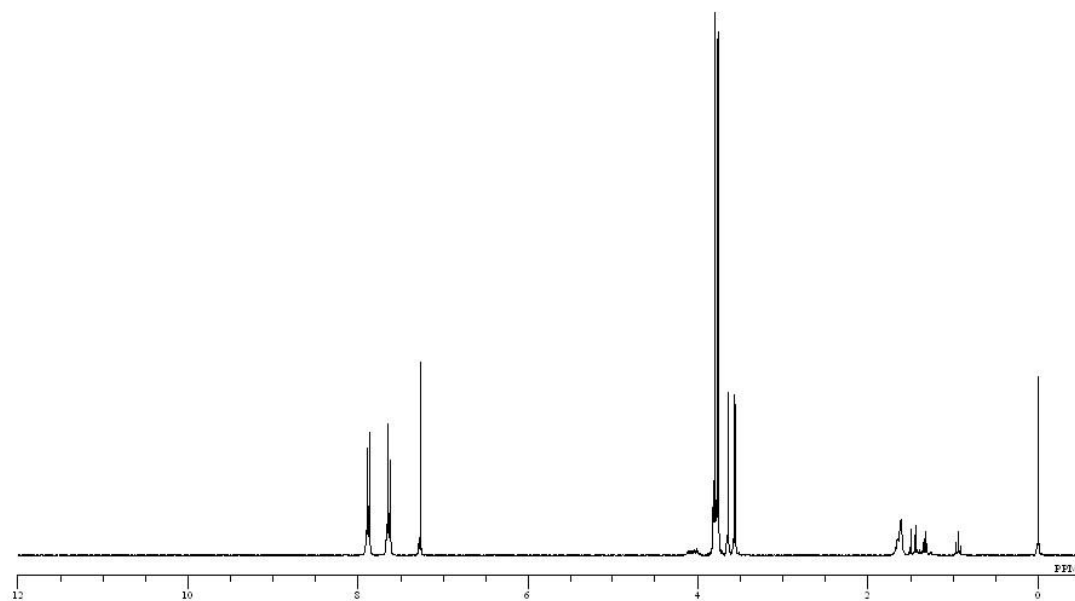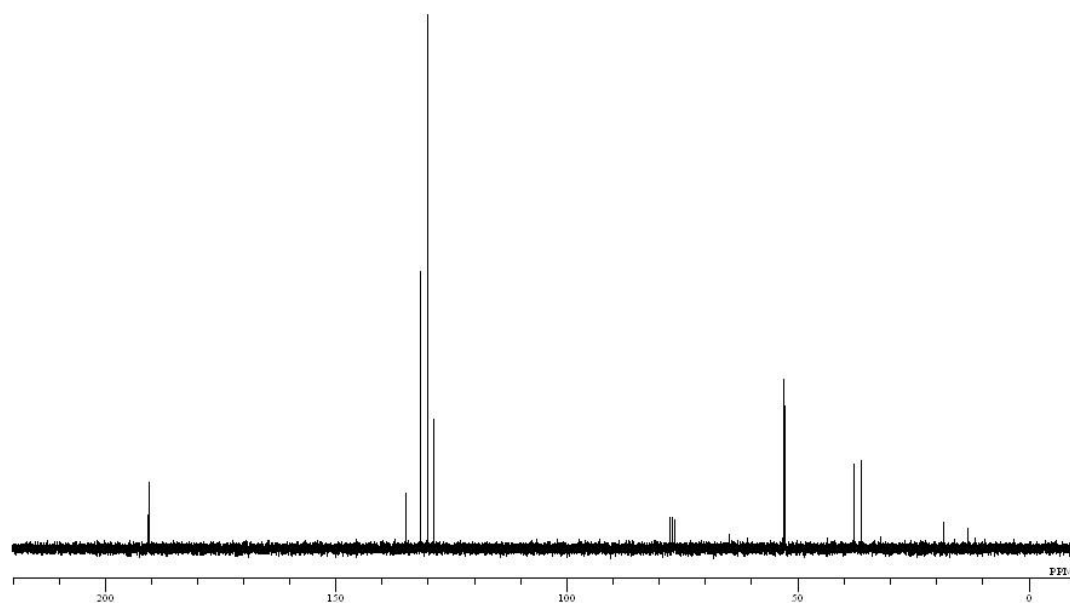

**(E)-4,4,4-Trifluoro-1,3-diphenylbut-2-en-1-one ((E)-10a)**

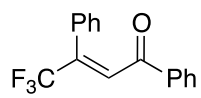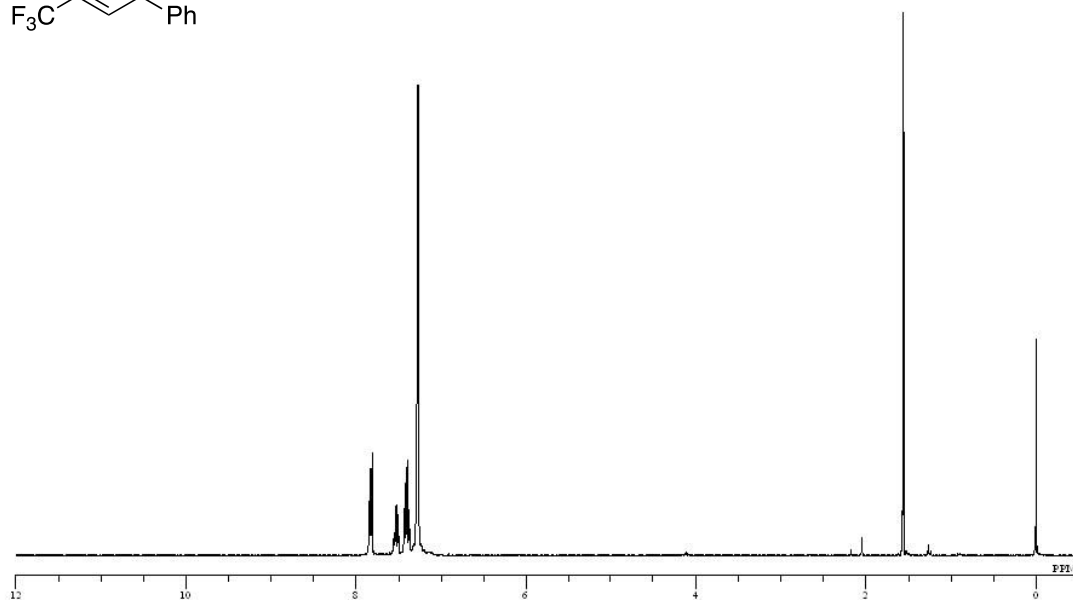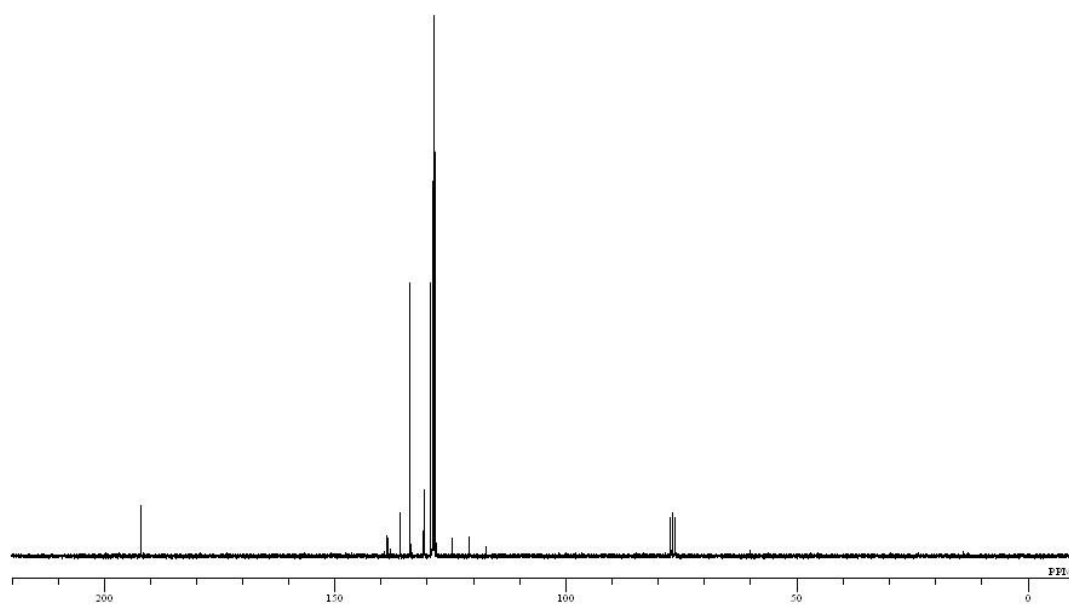

**(*E*)-4,4,4-Trifluoro-3-(4-methoxyphenyl)-1-phenylbut-2-en-1-one ((*E*)-10b)**

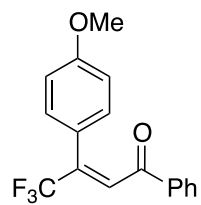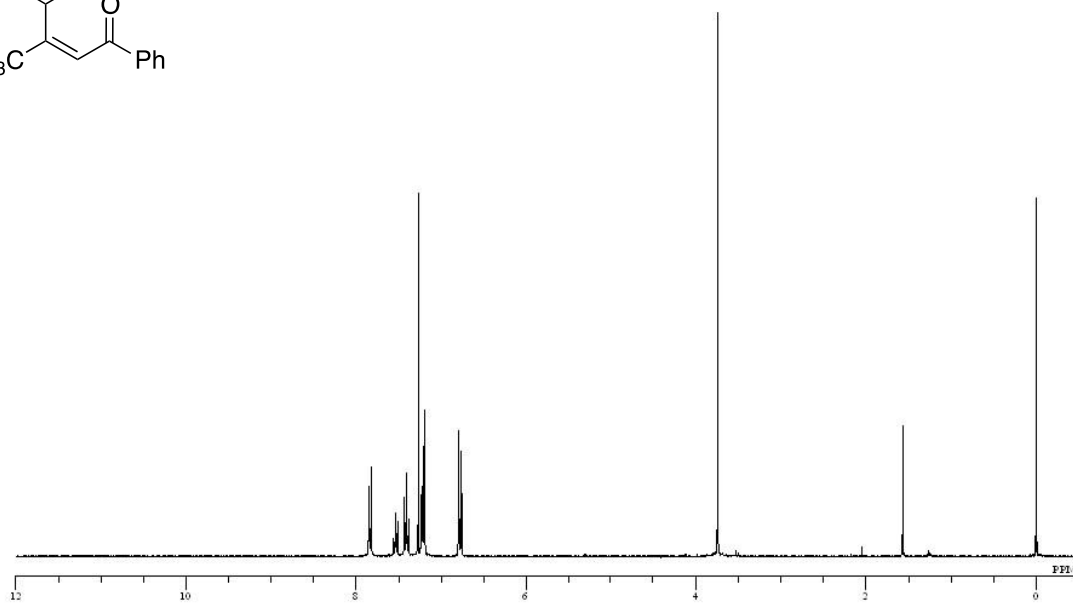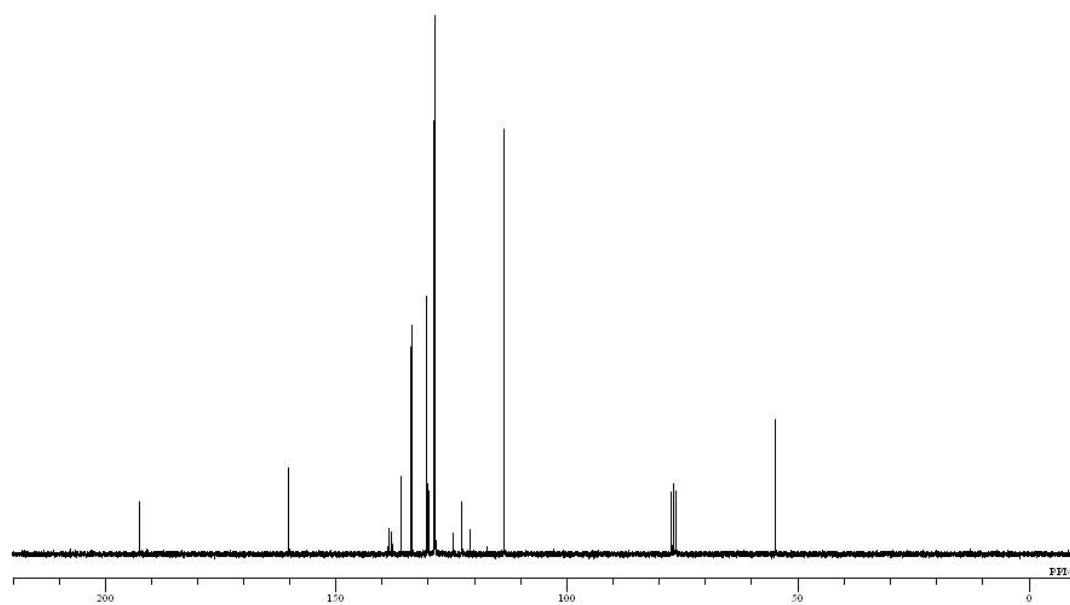



**(Z)-4,4,4-Trifluoro-3-(4-methoxyphenyl)-1-phenylbut-2-en-1-one ((Z)-10b)**

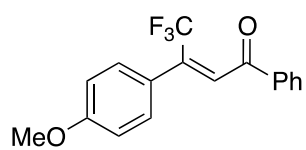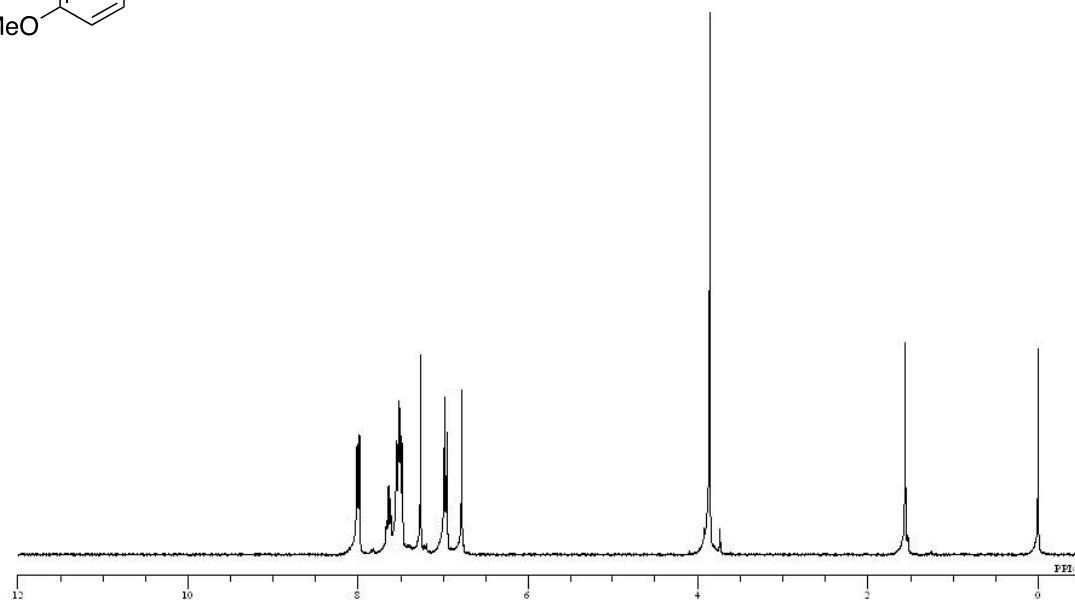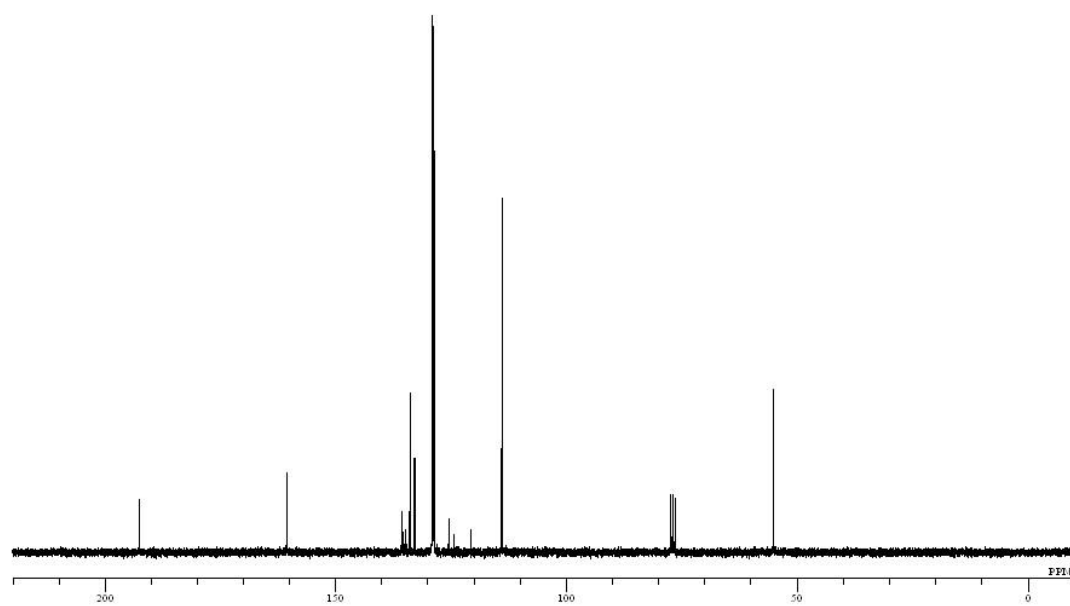

**(*E*)-4,4,4-Trifluoro-3-(4-fluorophenyl)-1-phenylbut-2-en-1-one ((*E*)-10c)**

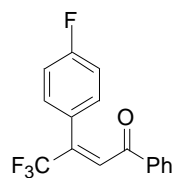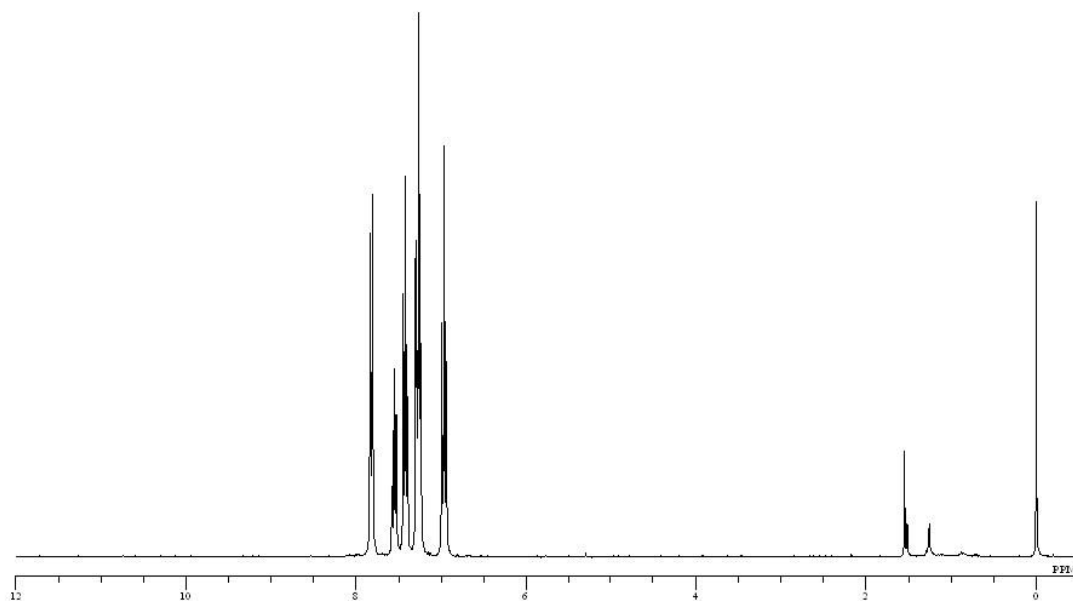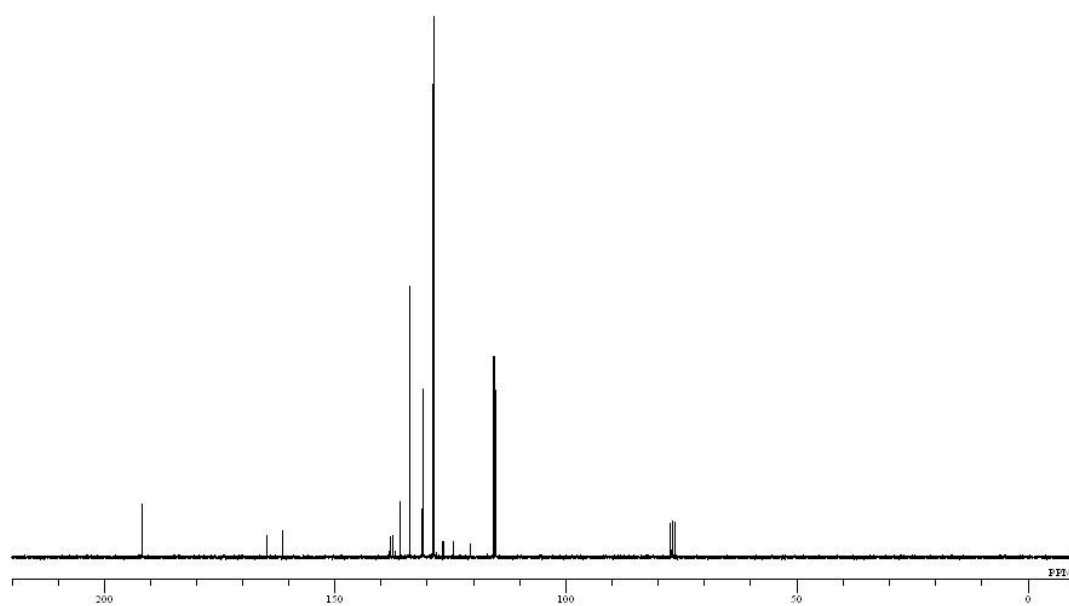

**(*E*)-1-Phenyl-3-(trifluoromethyl)pent-2-en-1-one ((*E*)-10d)**

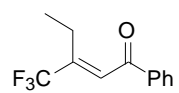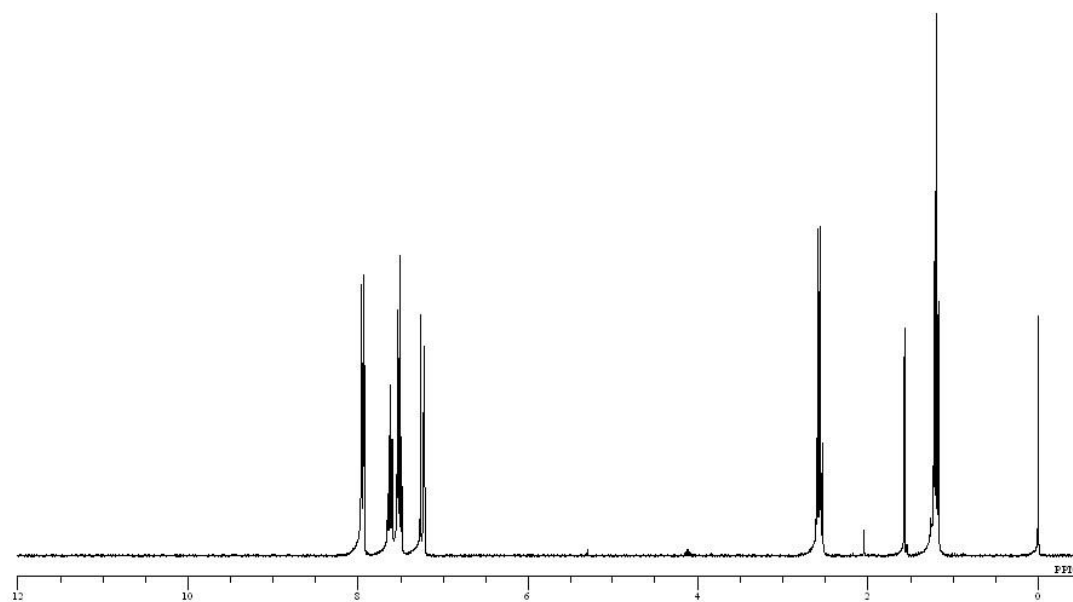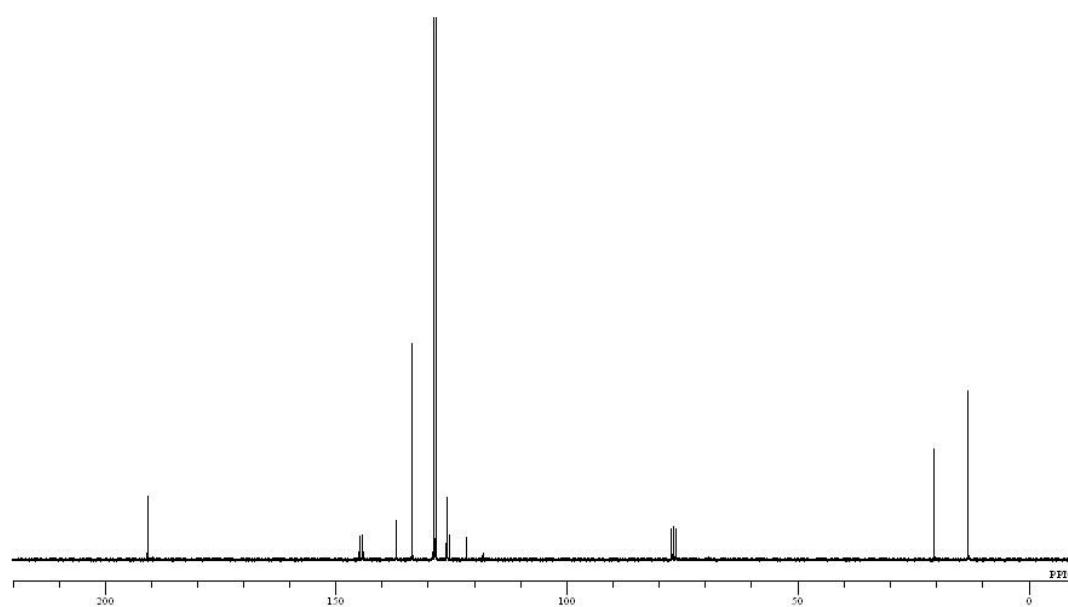

**(*E*)-1,5-Diphenyl-3-(trifluoromethyl)pent-2-en-1-one ((*E*)-10e)**

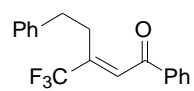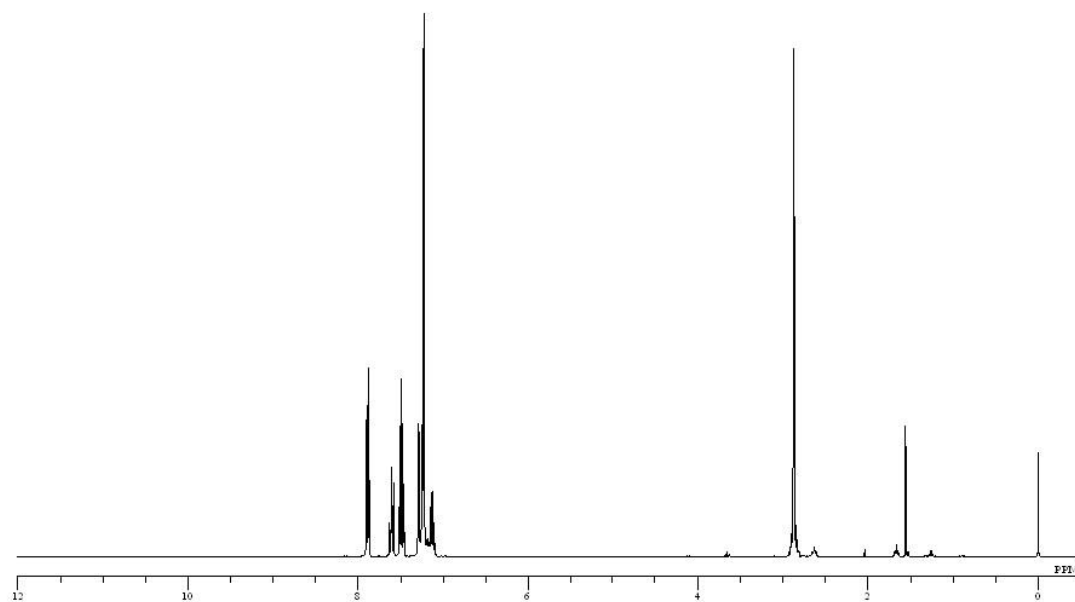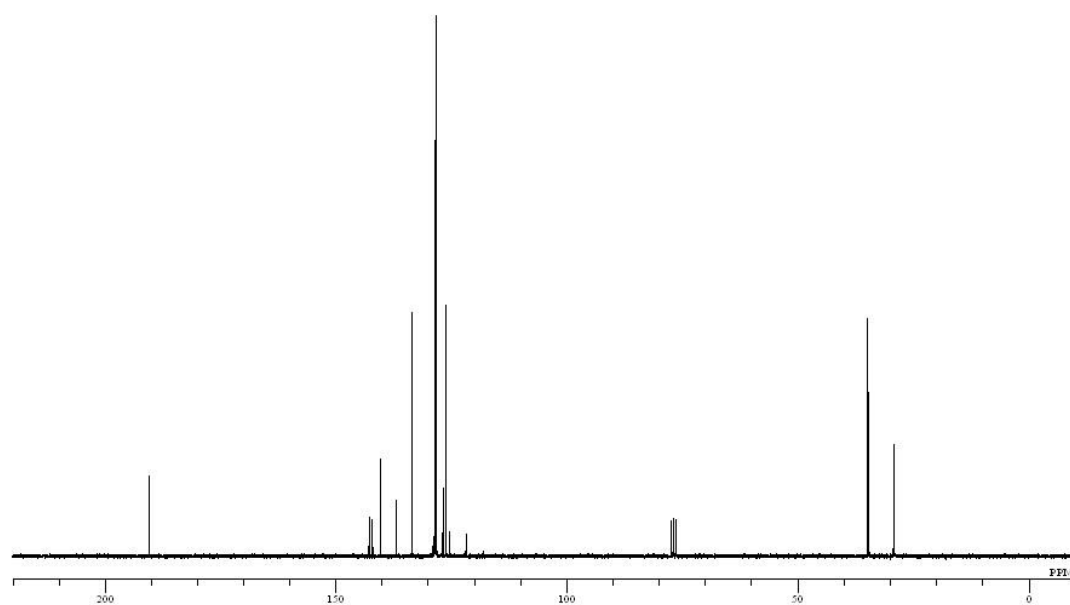

**(*E*)-1-(4-Methoxyphenyl)-5-phenyl-3-(trifluoromethyl)pent-2-en-1-one ((*E*)-10f)**

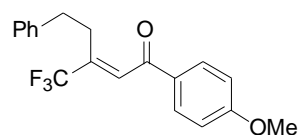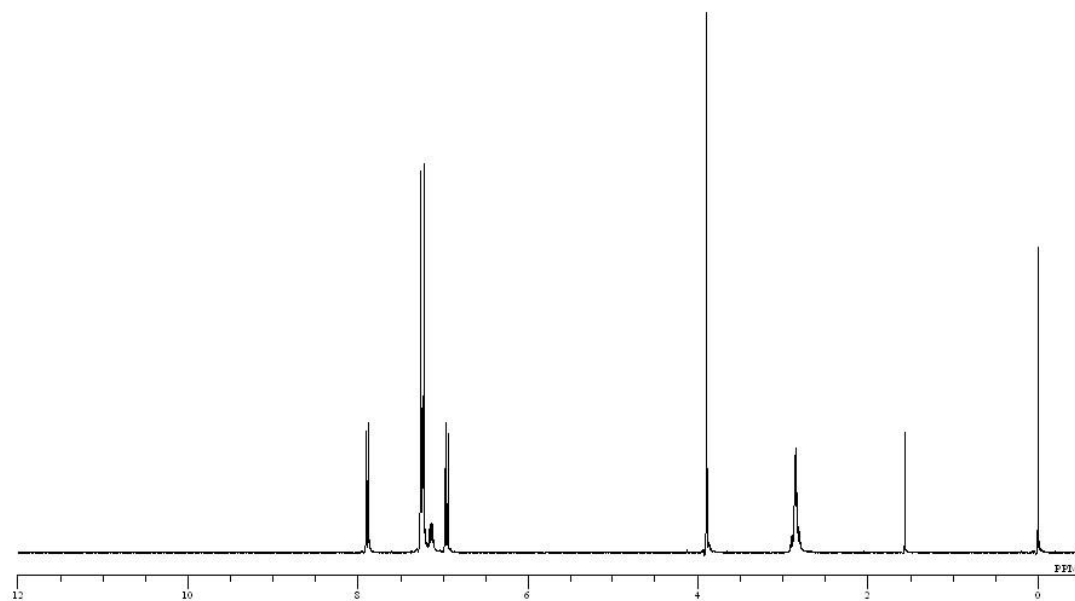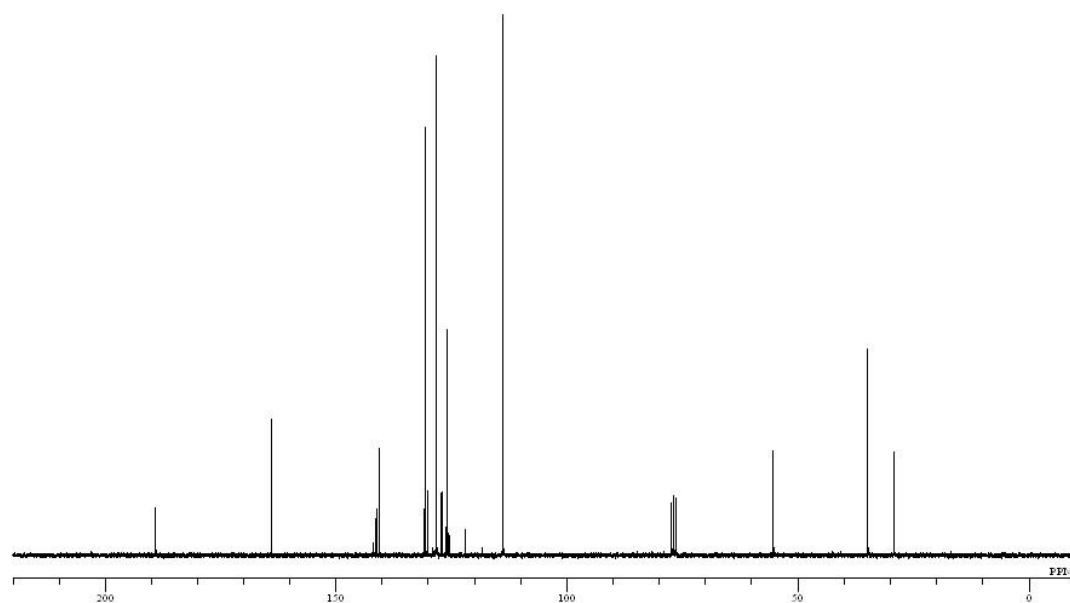

**(*E*)-1-(4-Bromophenyl)-5-phenyl-3-(trifluoromethyl)pent-2-en-1-one ((*E*)-10g)**

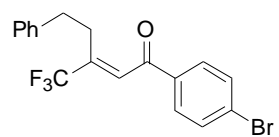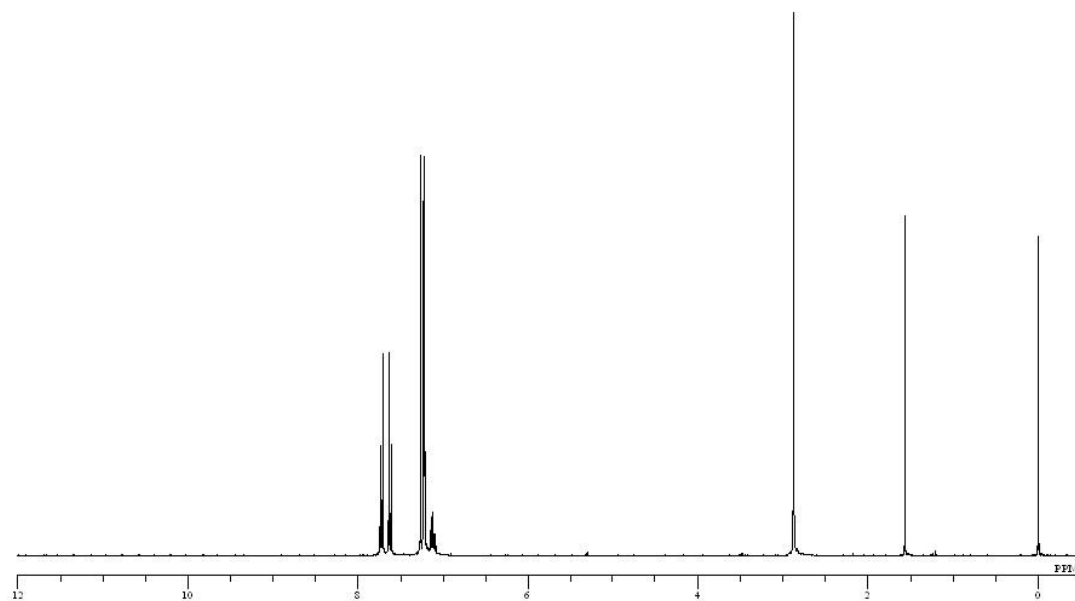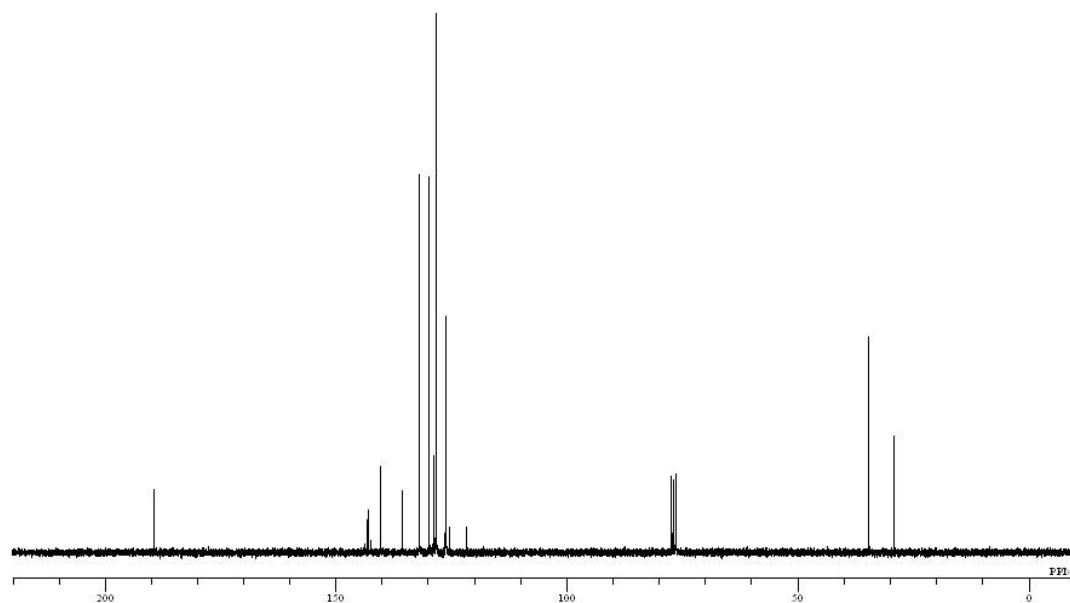

**(*E*)-6,6,6-Trifluoro-1,5-diphenylhex-4-en-3-one ((*E*)-10h)**

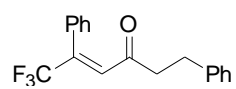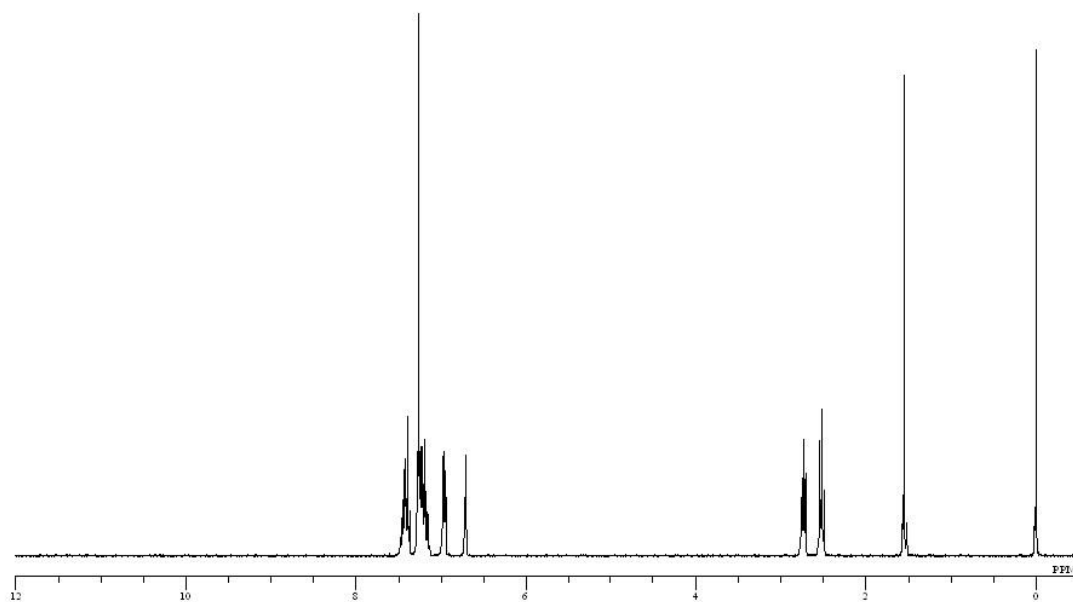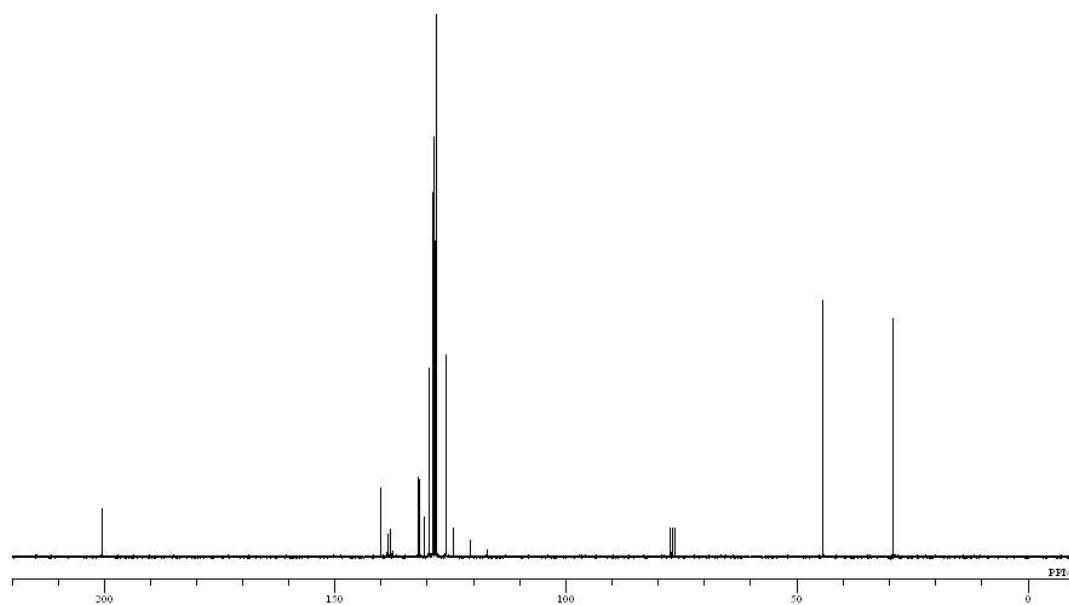

**(Z)-6,6,6-Trifluoro-1,5-diphenylhex-4-en-3-one ((Z)-10h)**

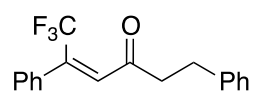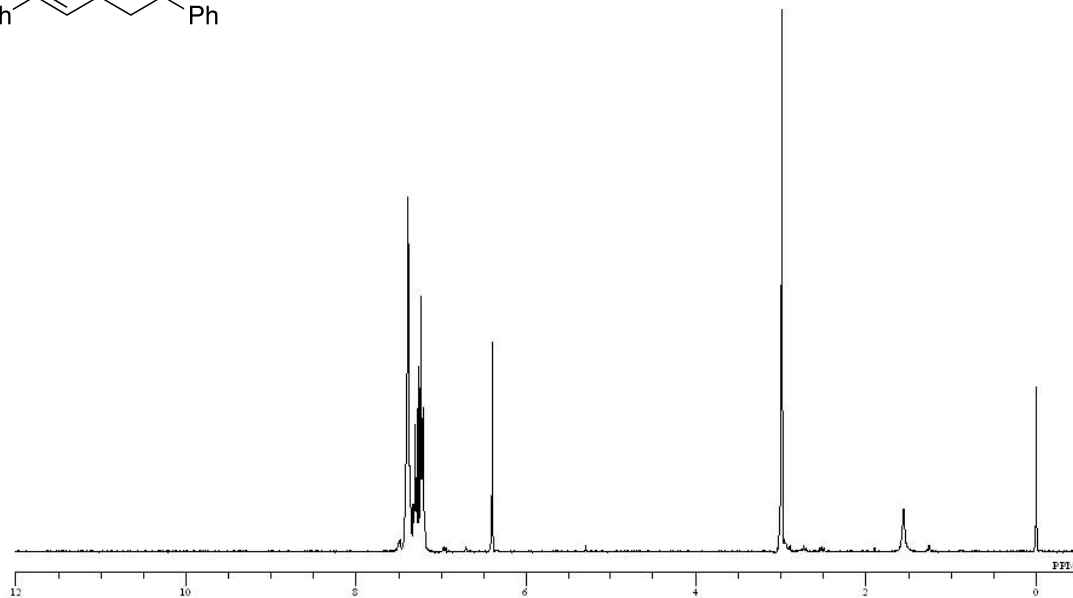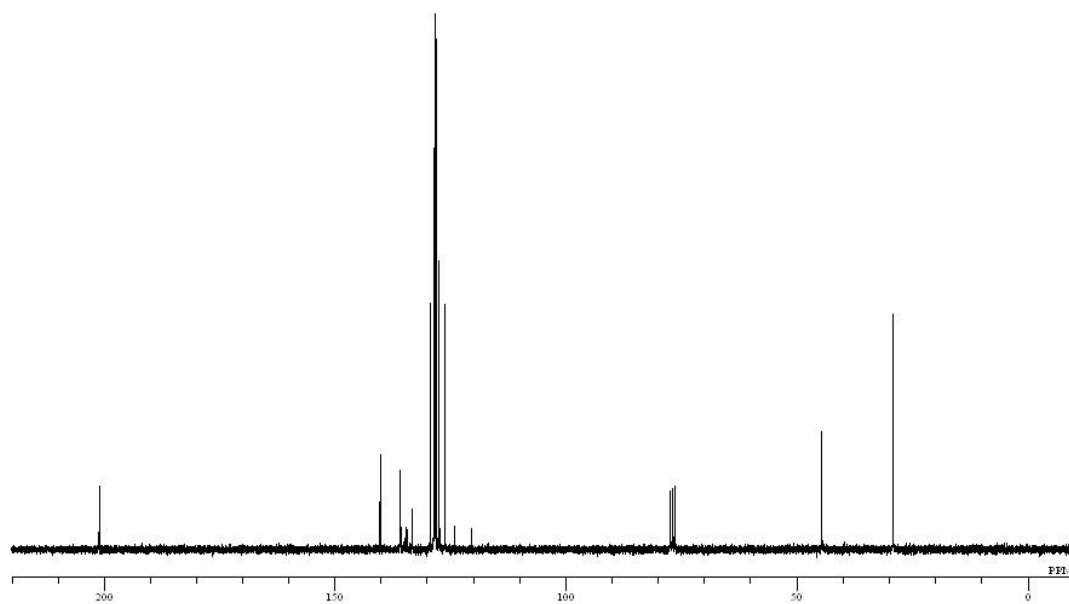



**(*E*)-6,6,6-Trifluoro-5-phenylhex-4-en-3-one ((*E*)-10i)**

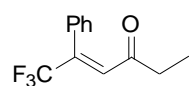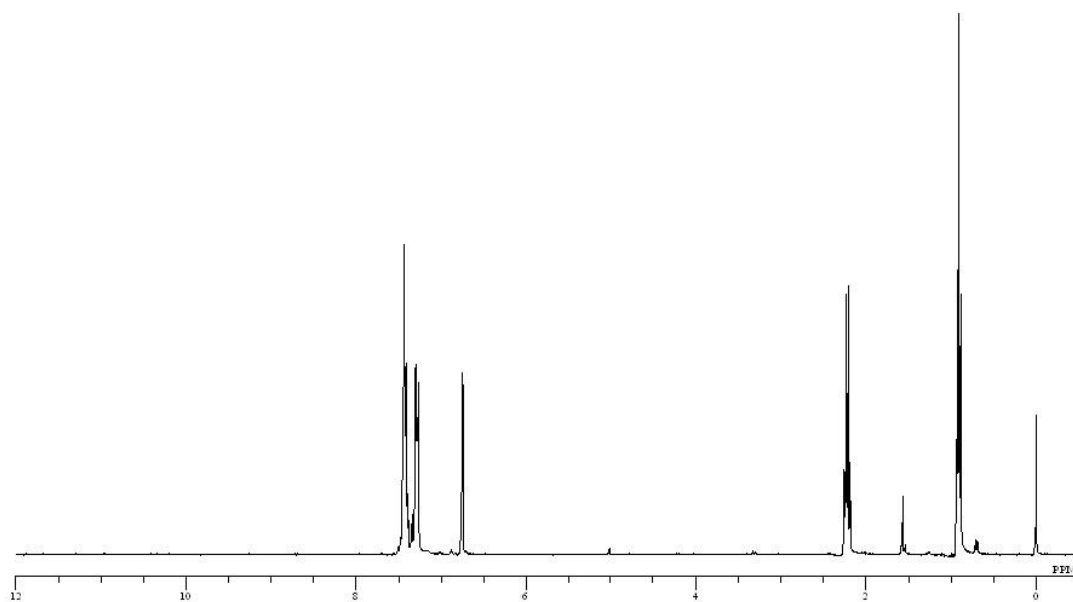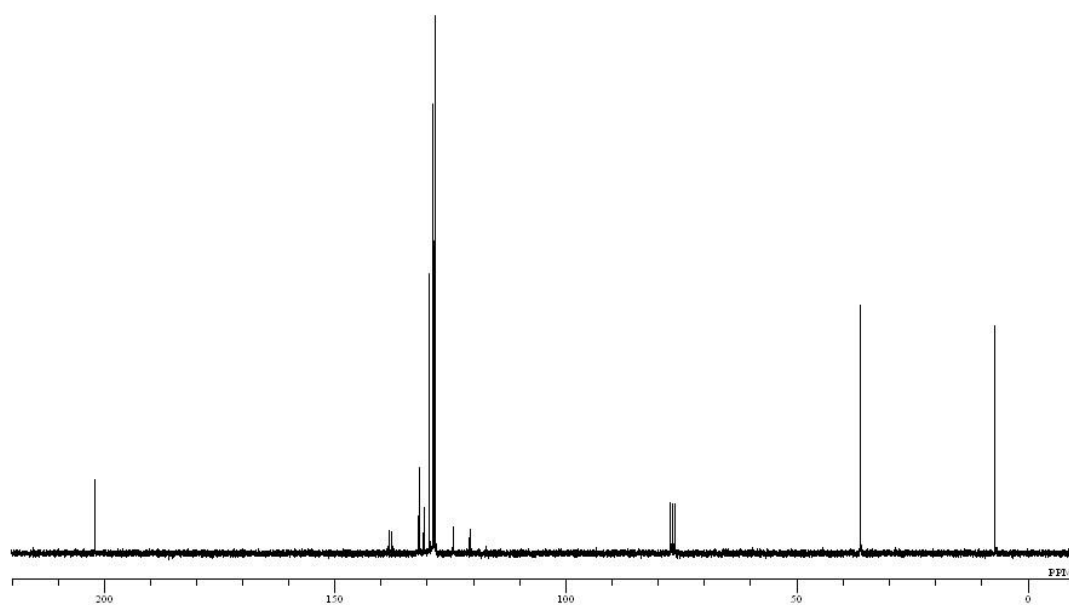

**(*E*)-4,4,4-Tri- fluoro-1,3-diphenylbut-2-en-1-ol ((*E*)-6a)**

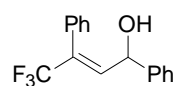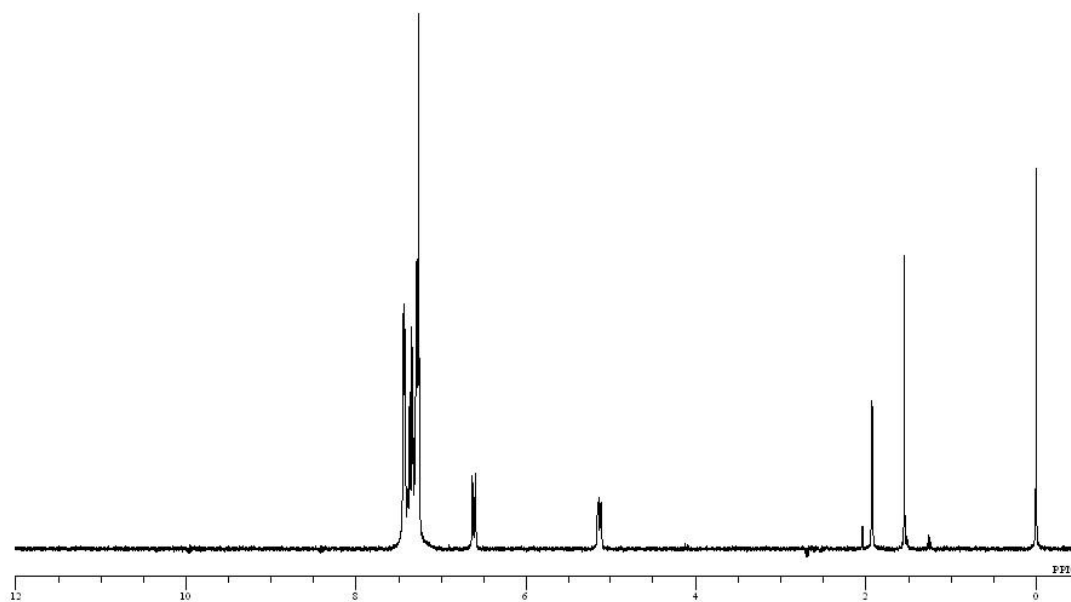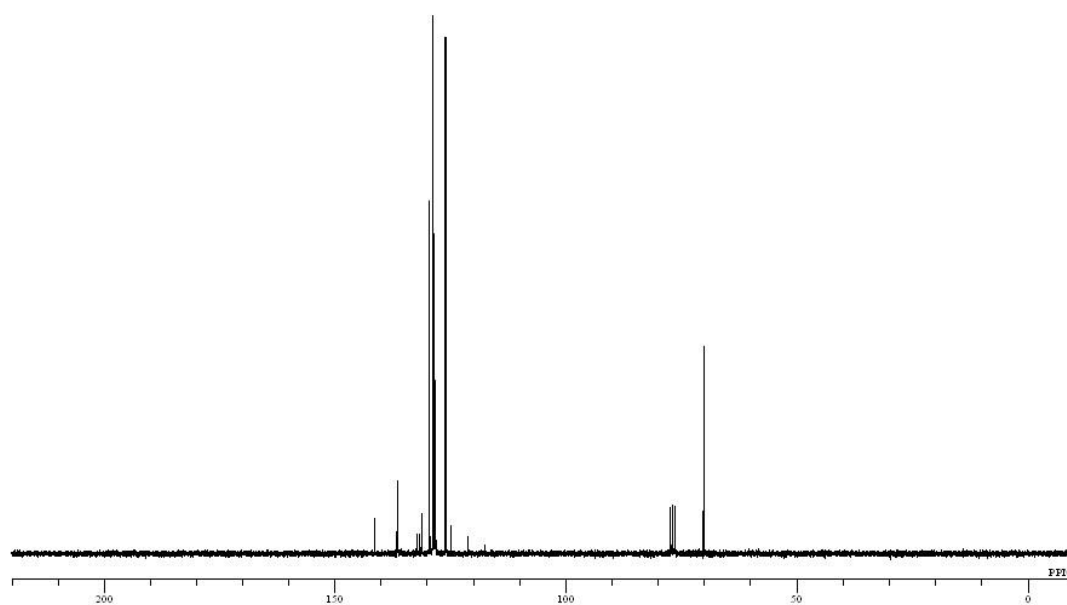

**(*E*)-4,4,4-Trifluoro-3-(4-methoxyphenyl)-1-phenylbut-2-en-1-ol ((*E*)-6b)**

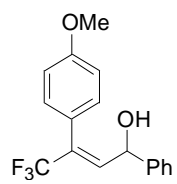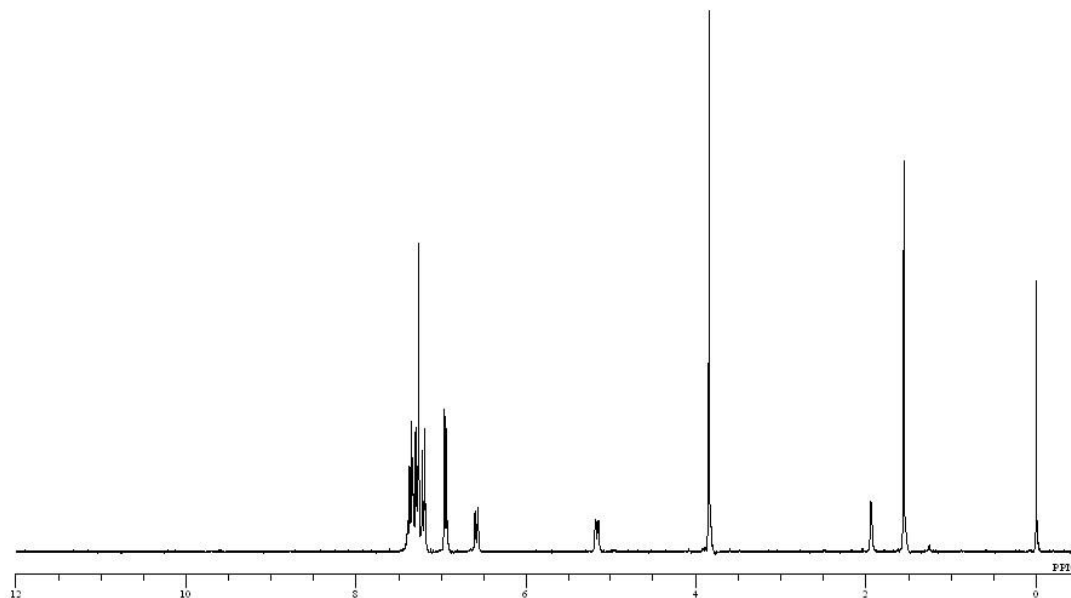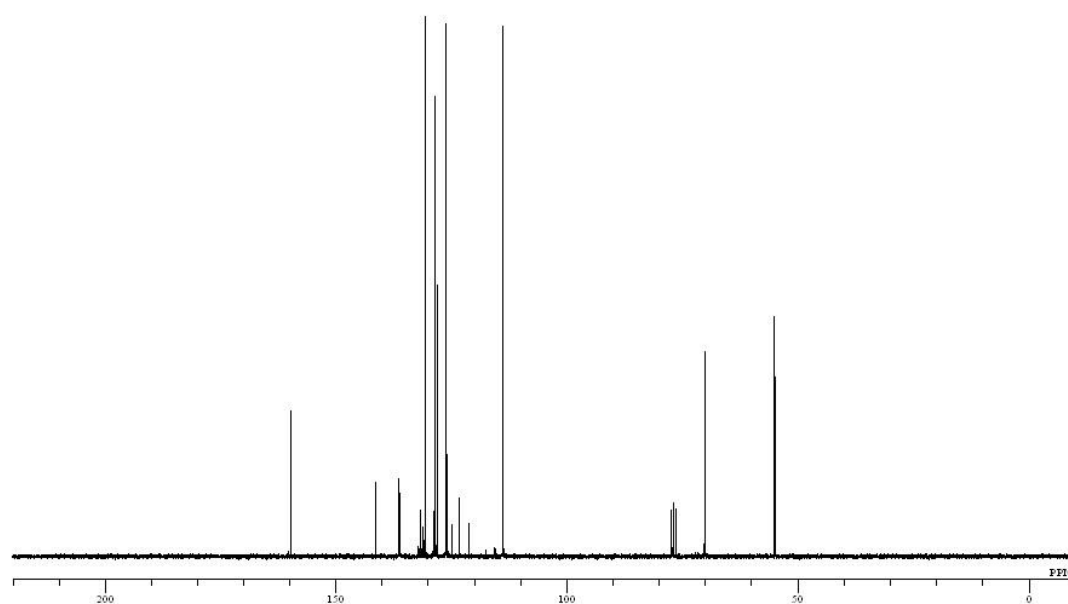

**(*E*)-4,4,4-Trifluoro-3-(4-fluorophenyl)-1-phenylbut-2-en-1-ol ((*E*)-6c)**

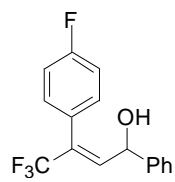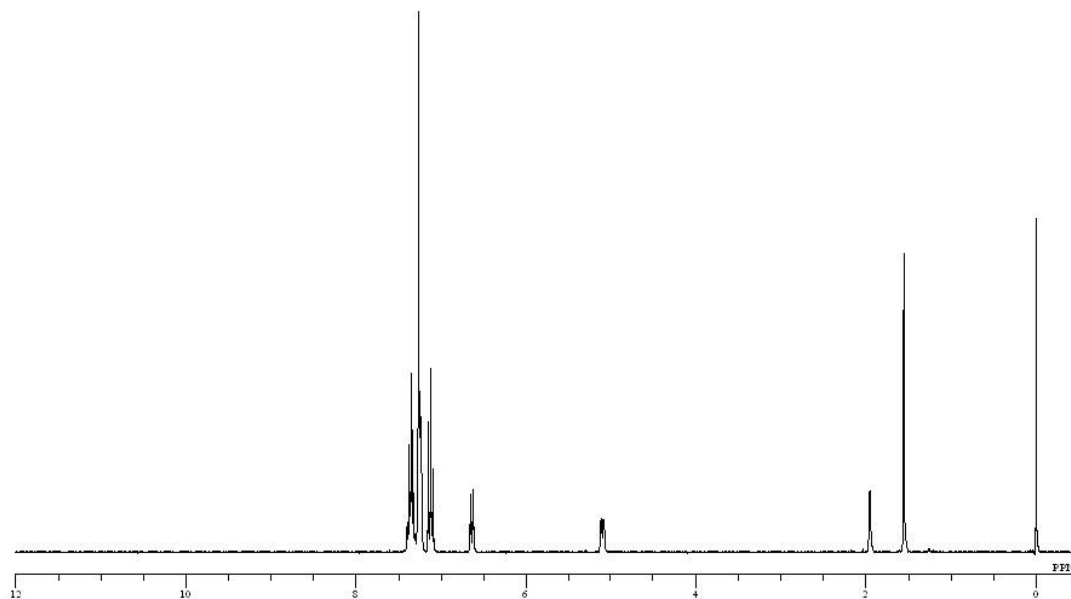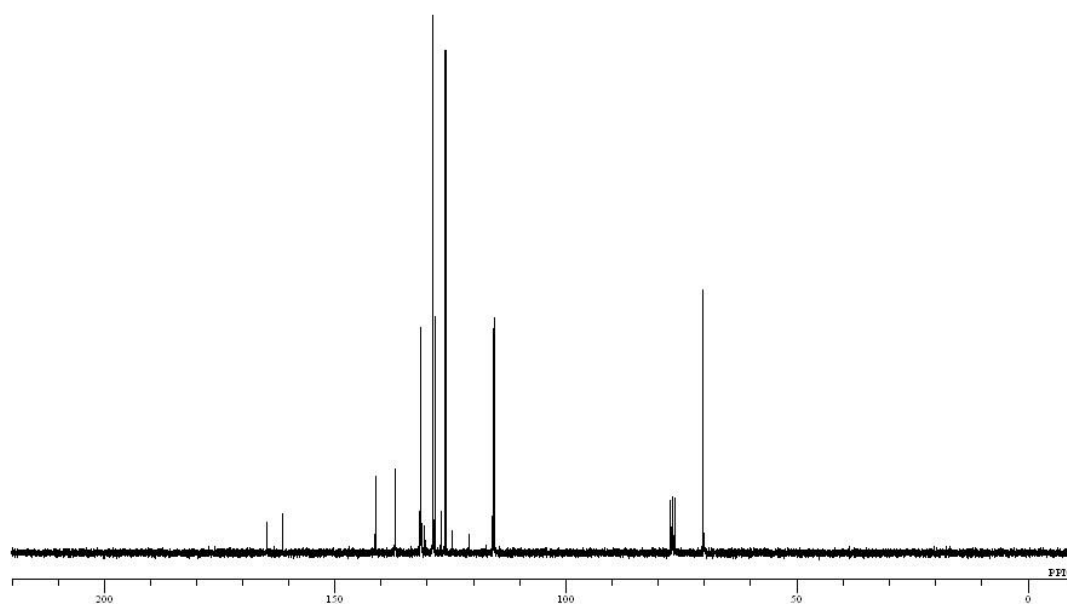

**(*E*)-1-Phenyl-3-(trifluoromethyl)pent-2-en-1-ol ((*E*)-6d)**

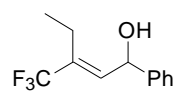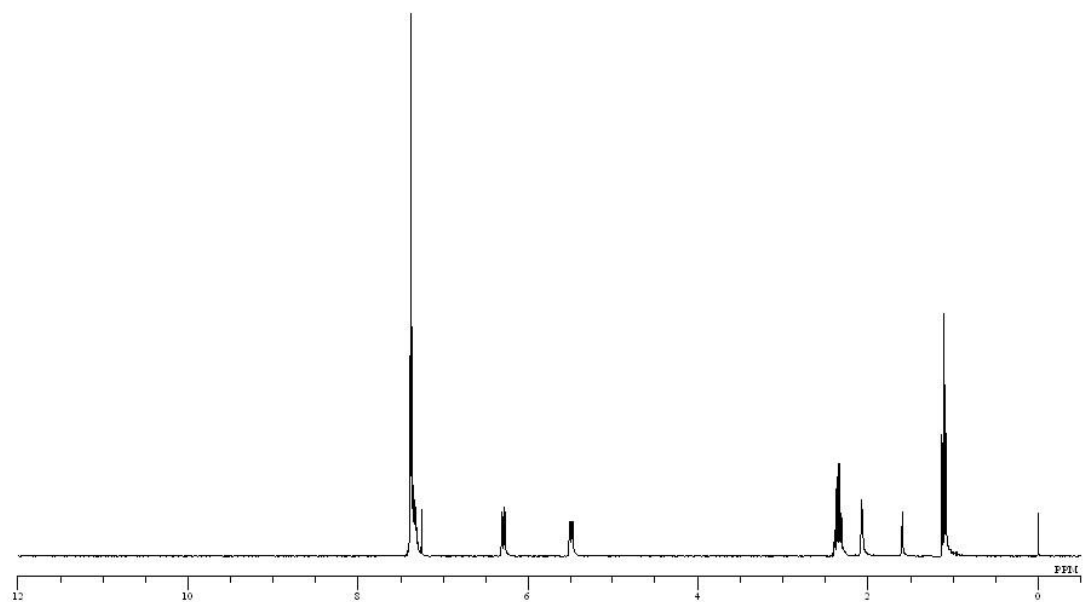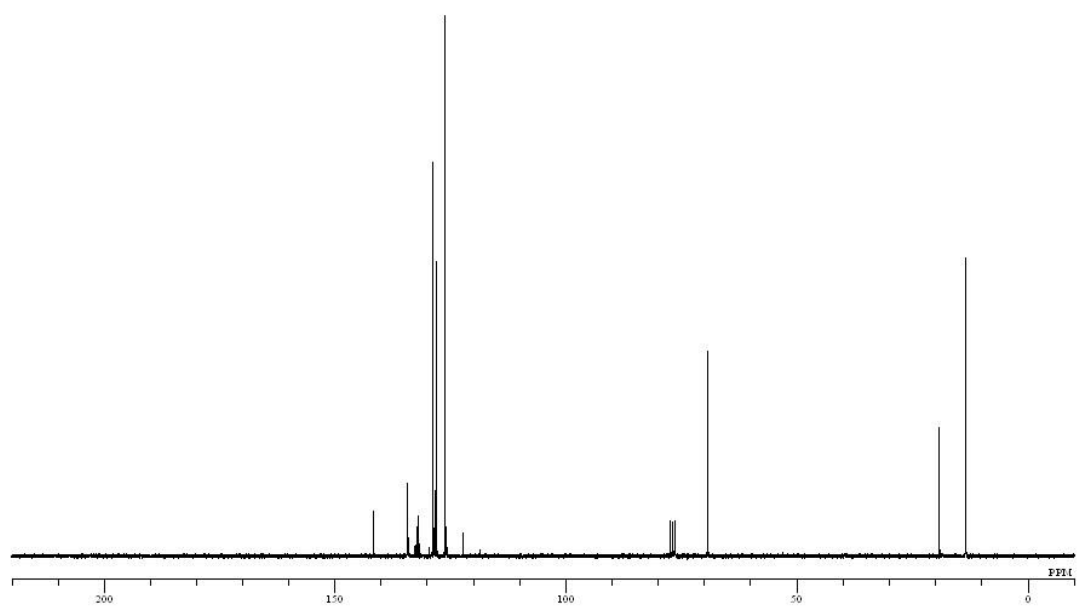

**(E)-1,5-Diphenyl-3-(trifluoromethyl)pent-2-en-1-ol ((E)-6e)**

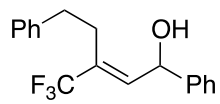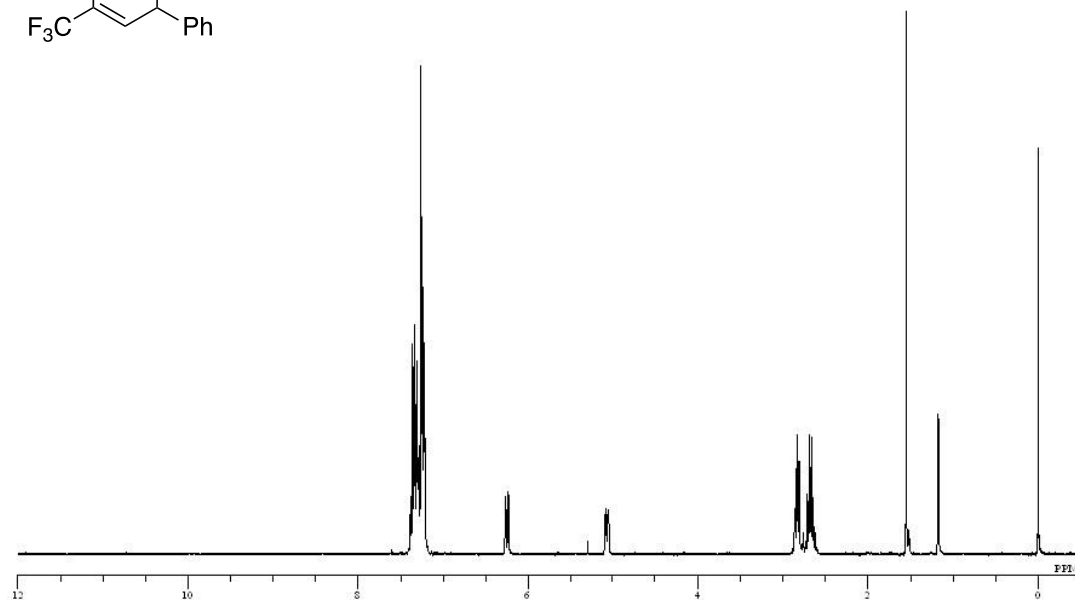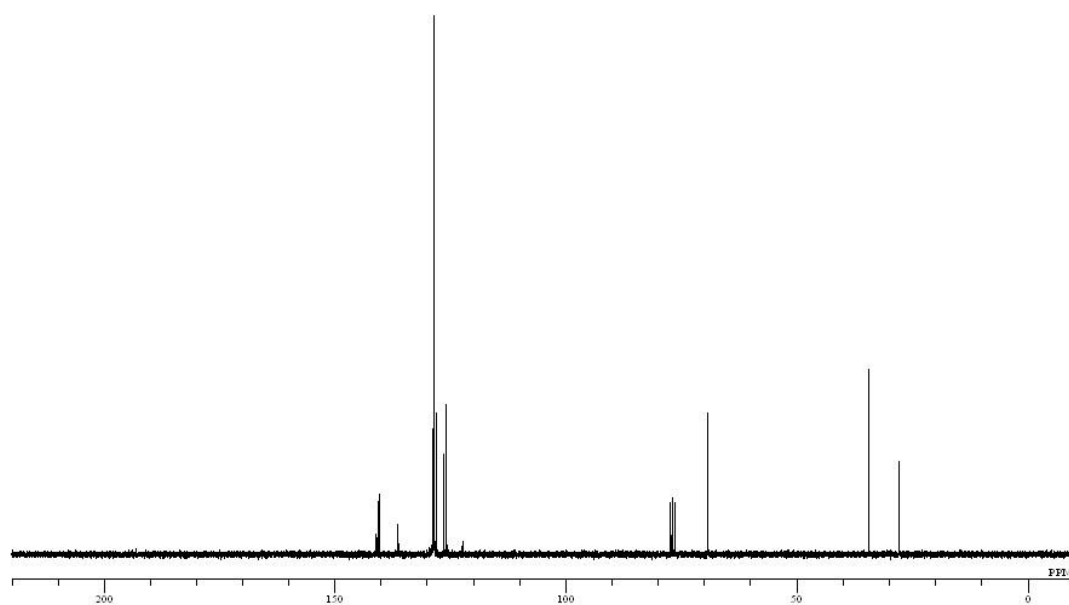

**(*E*)-1-(4-Methoxyphenyl)-5-phenyl-3-(trifluoromethyl)pent-2-en-1-ol ((*E*)-6f)**

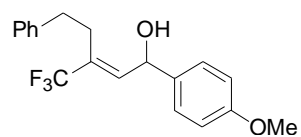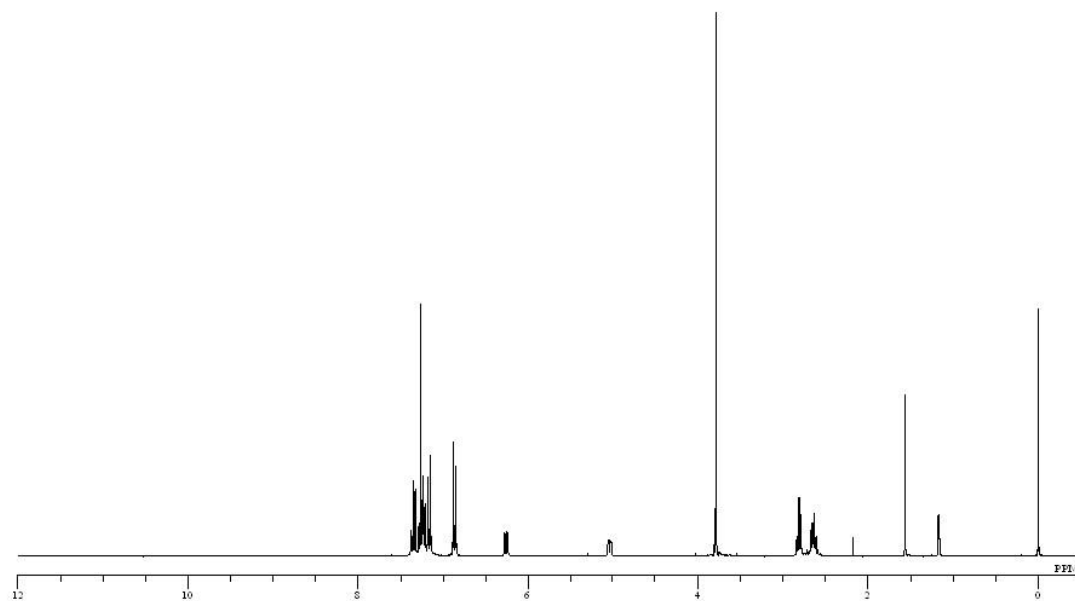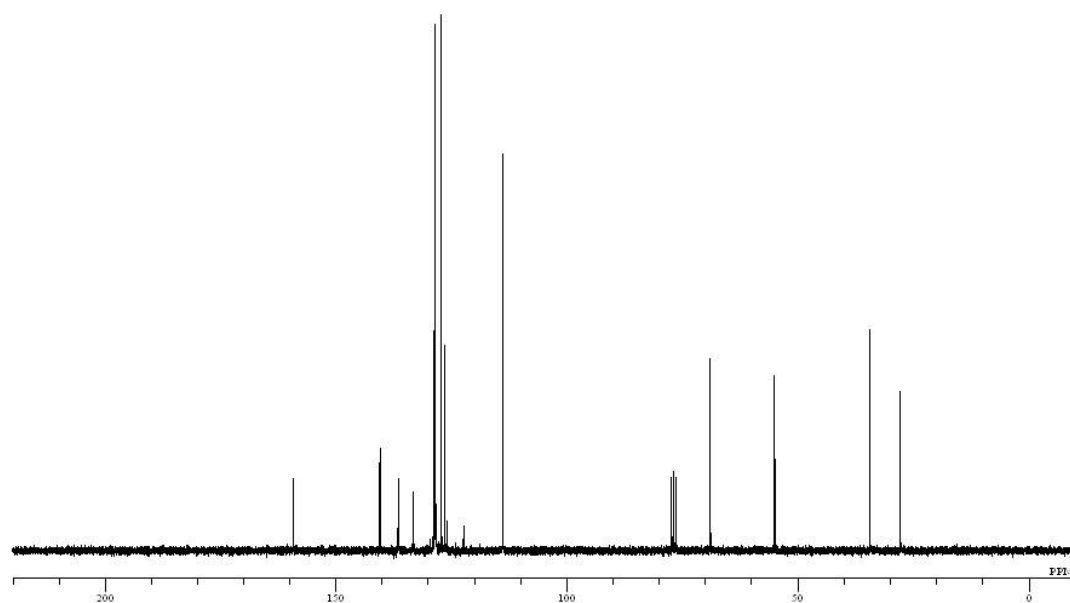

**(*E*)-1-(4-Bromophenyl)-5-phenyl-3-(trifluoromethyl)pent-2-en-1-ol ((*E*)-6g)**

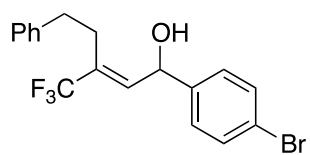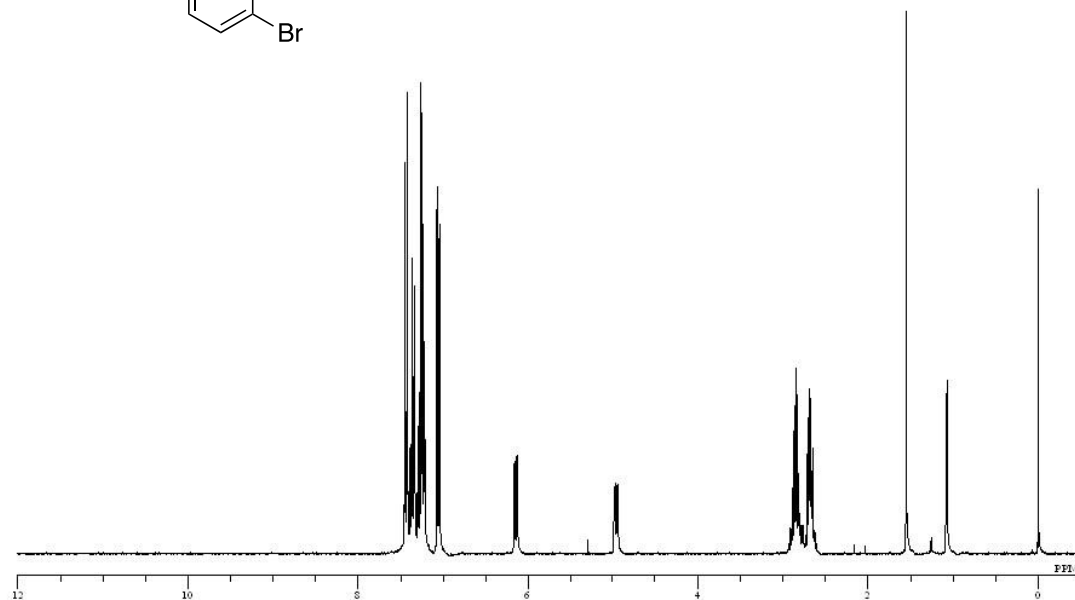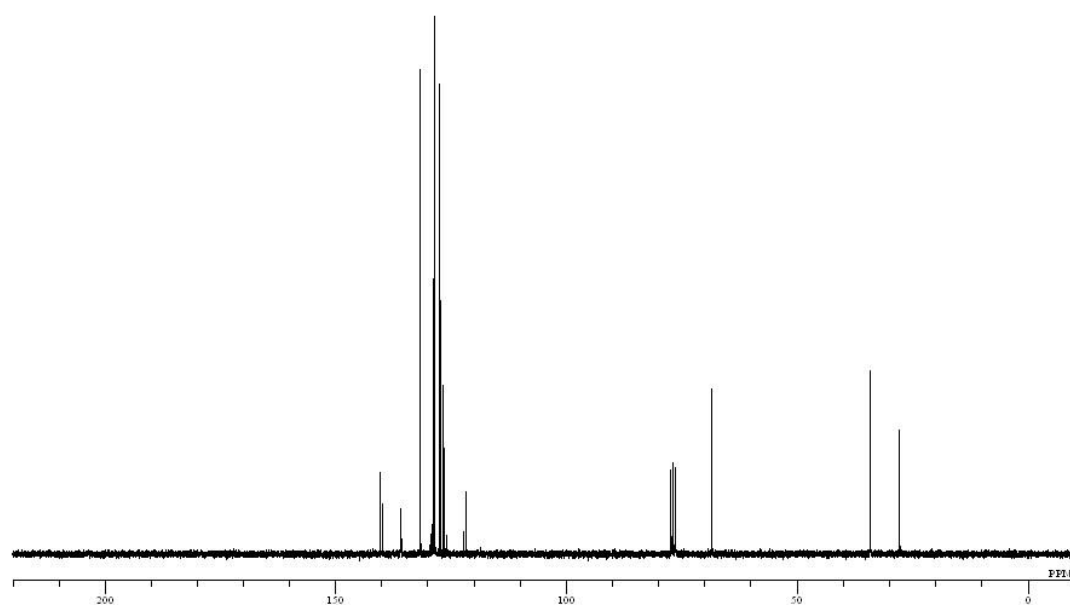



**(*E*)-6,6,6-Trifluoro-1,5-diphenylhex-4-en-3-ol ((*E*)-6h)**

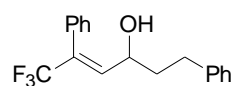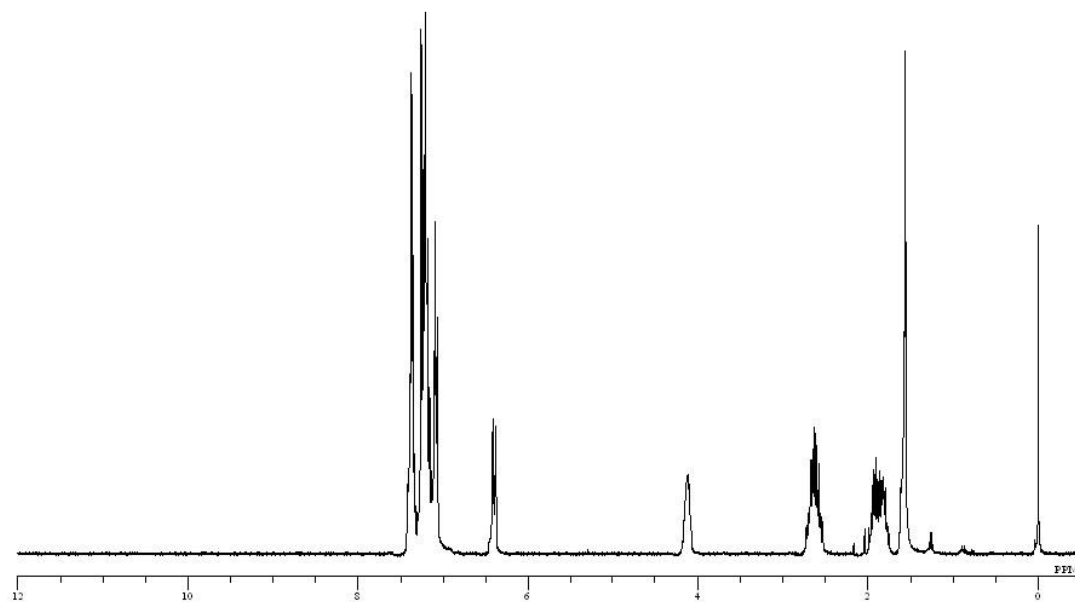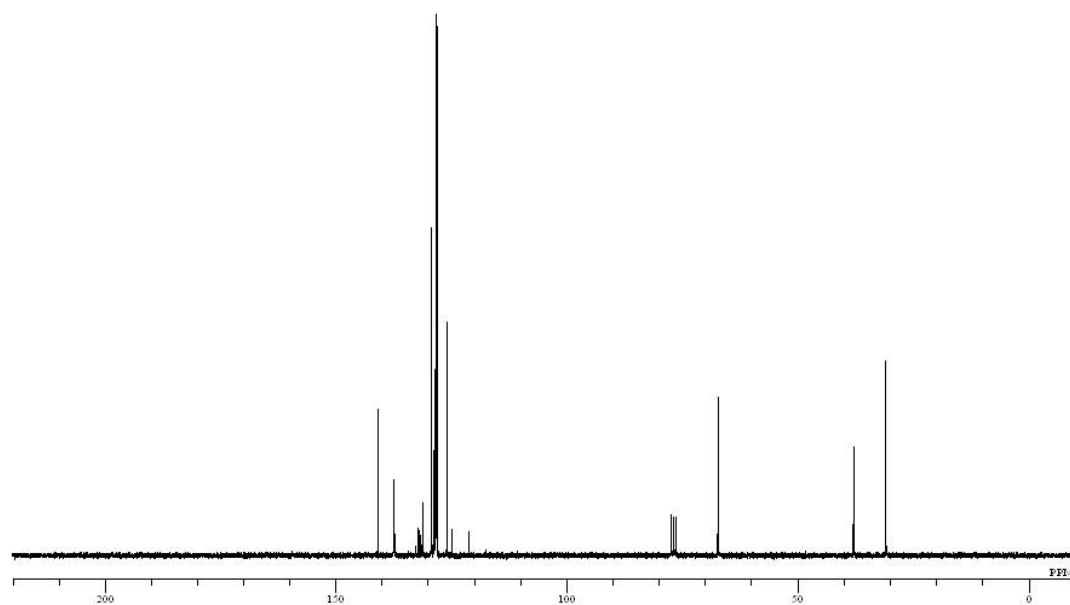

**(*E*)-6,6,6-Trifluoro-5-phenylhex-4-en-3-ol ((*E*)-6i)**

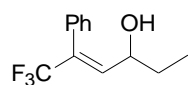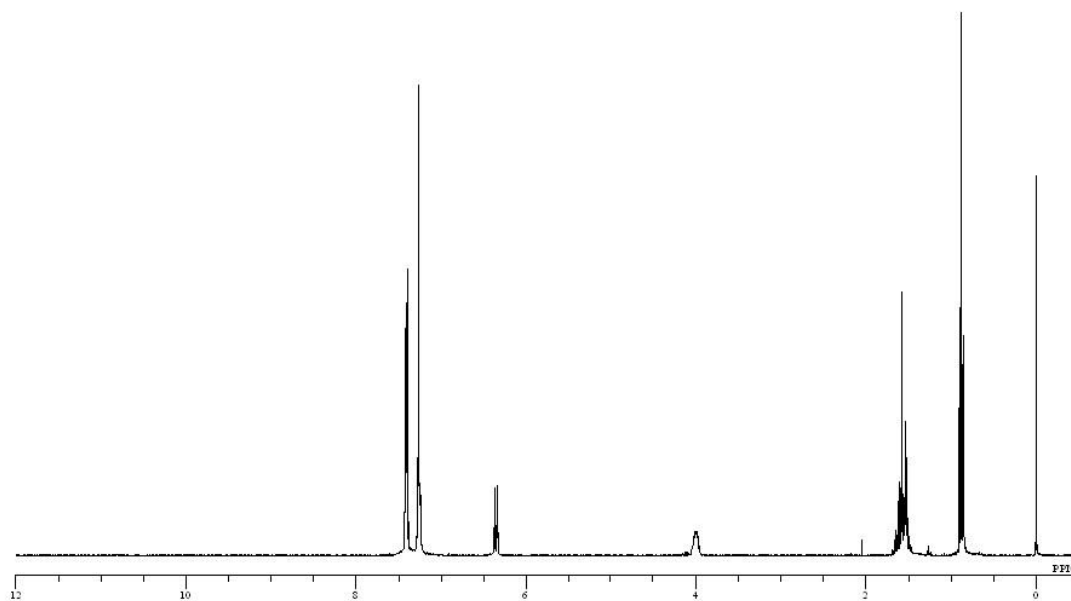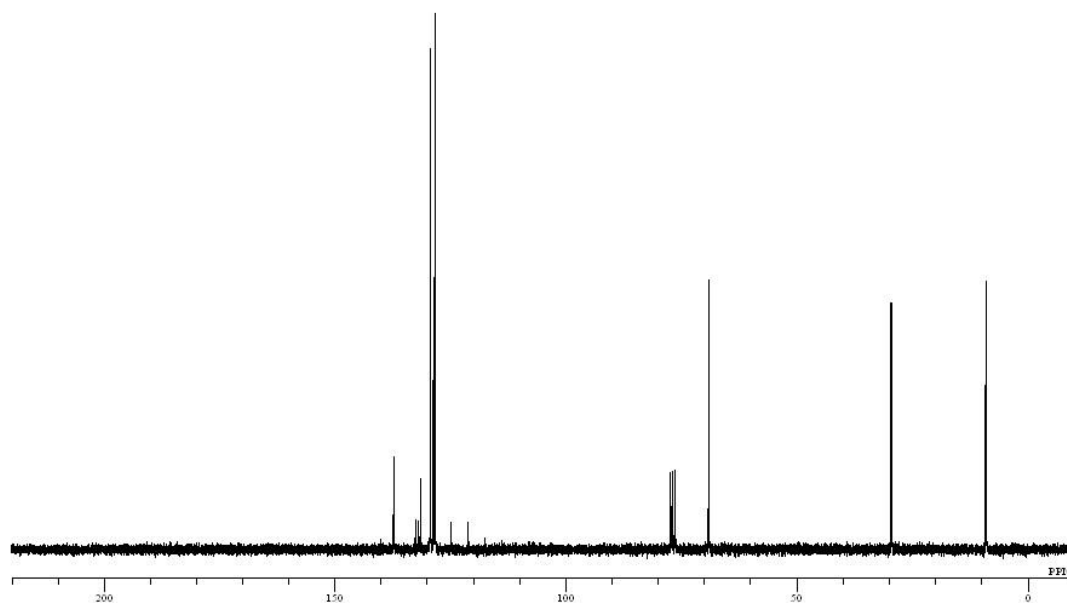

**4,4,4-Trifluoro-1,3-diphenylbutan-1-one (7a)**

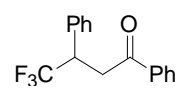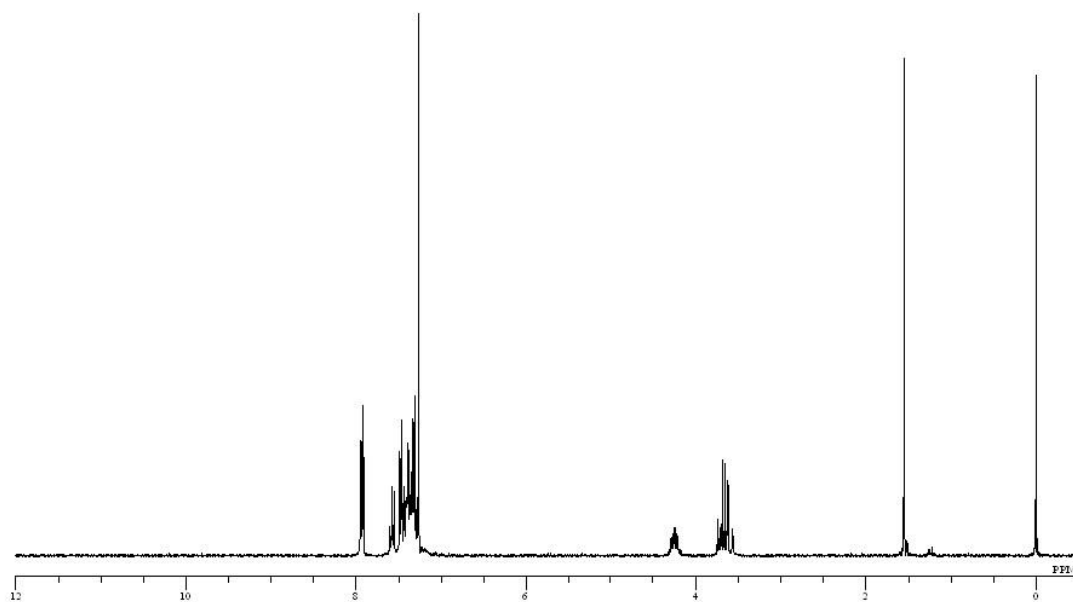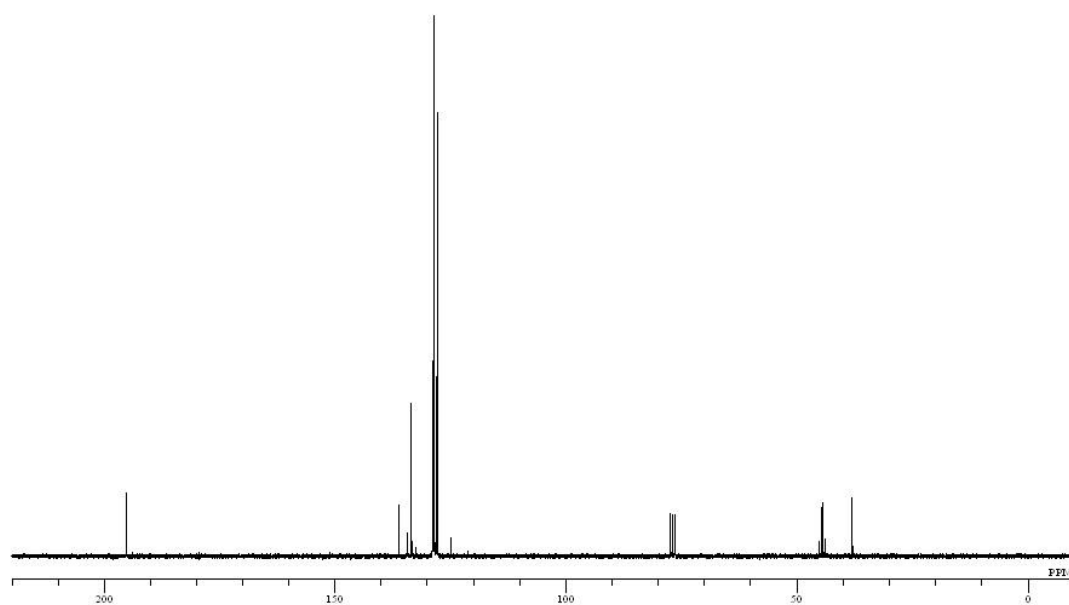

**4,4,4-Trifluoro-3-(4-methoxyphenyl)-1-phenylbutan-1-one (7b)**

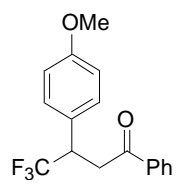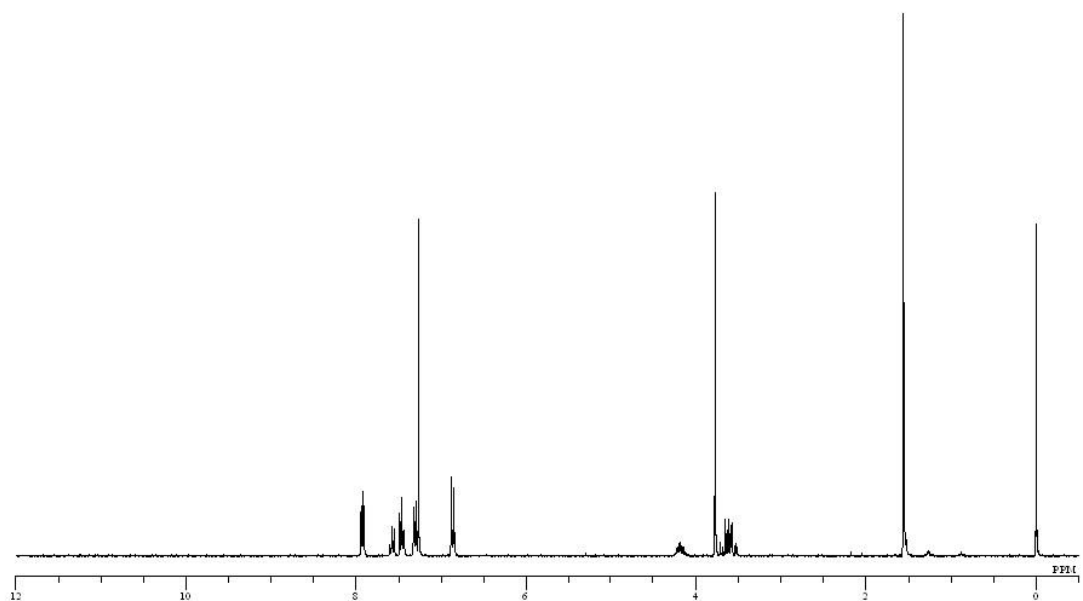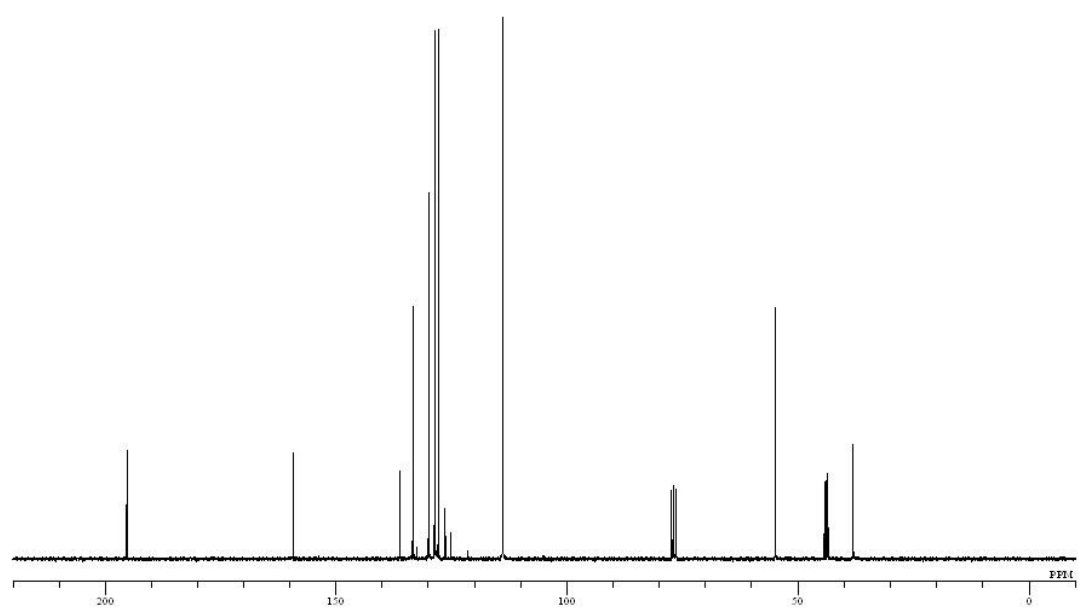

**4,4,4-Trifluoro-3-(4-fluorophenyl)-1-phenylbutan-1-one (7c)**

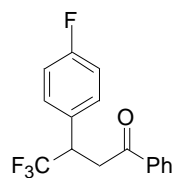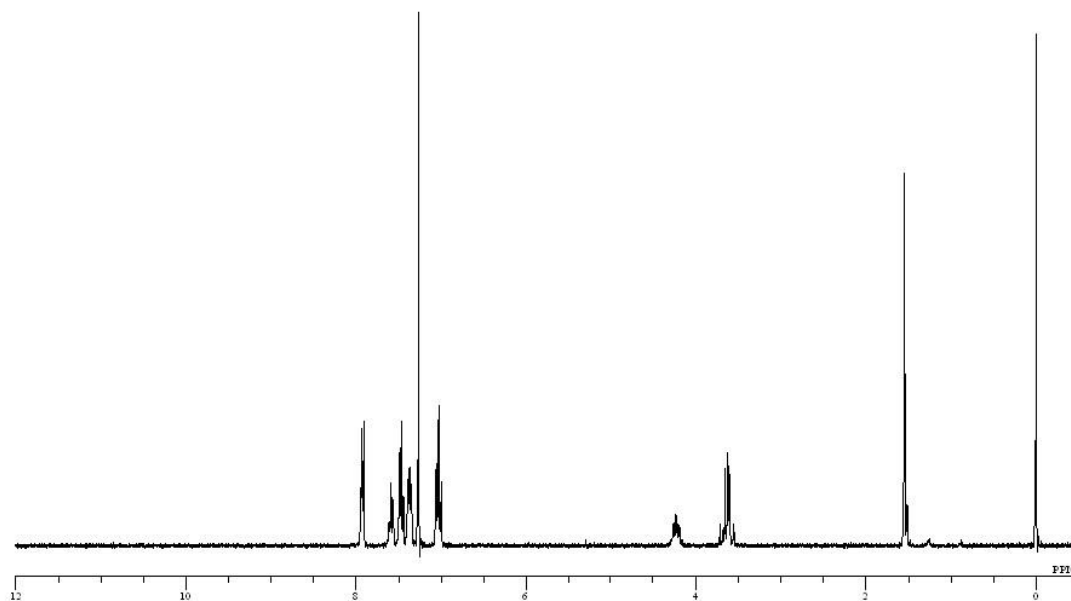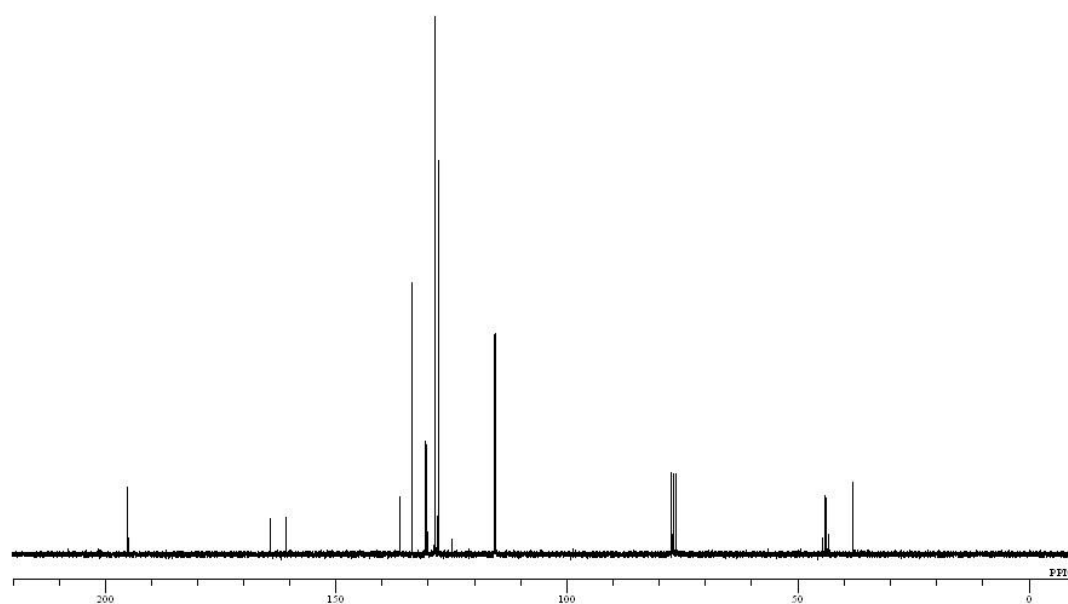

**1-Phenyl-3-(trifluoromethyl)pentan-1-one (7d)**

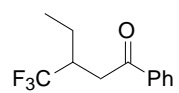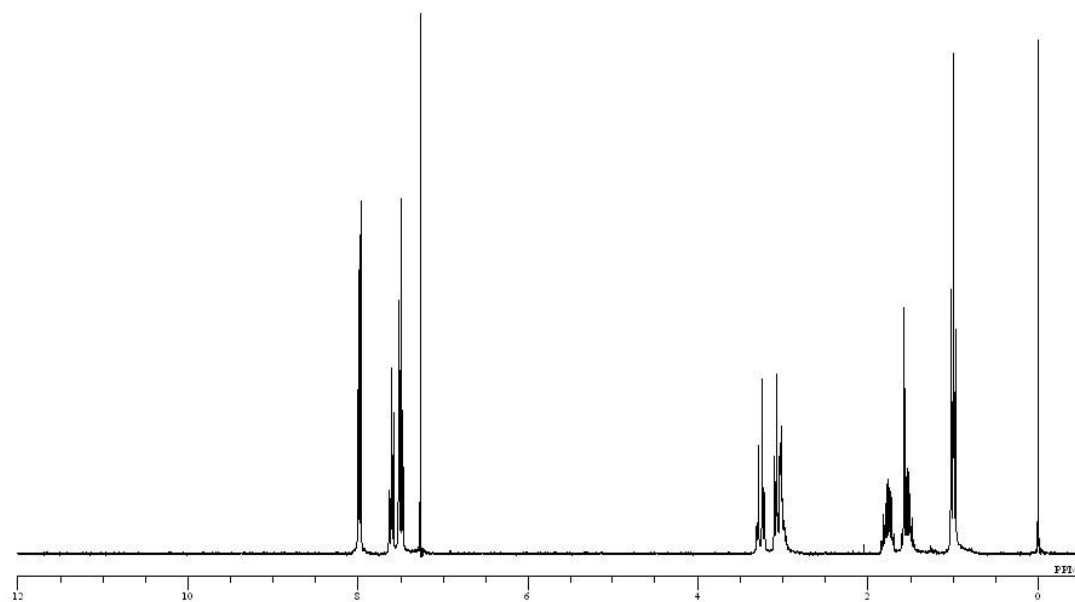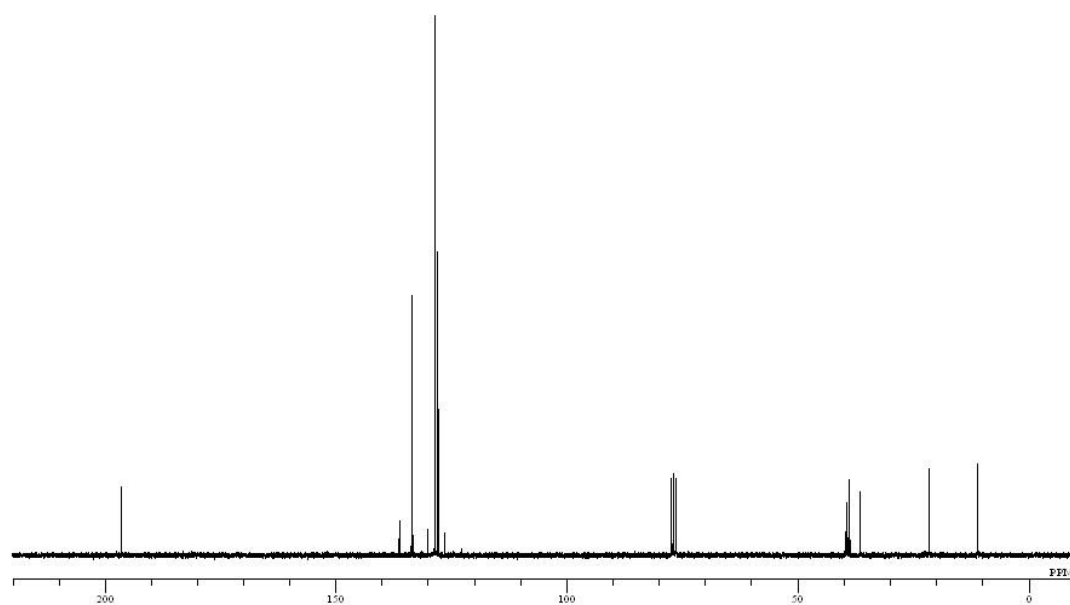

**1,5-Diphenyl-3-(trifluoromethyl)pentan-1-one (7e)**

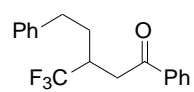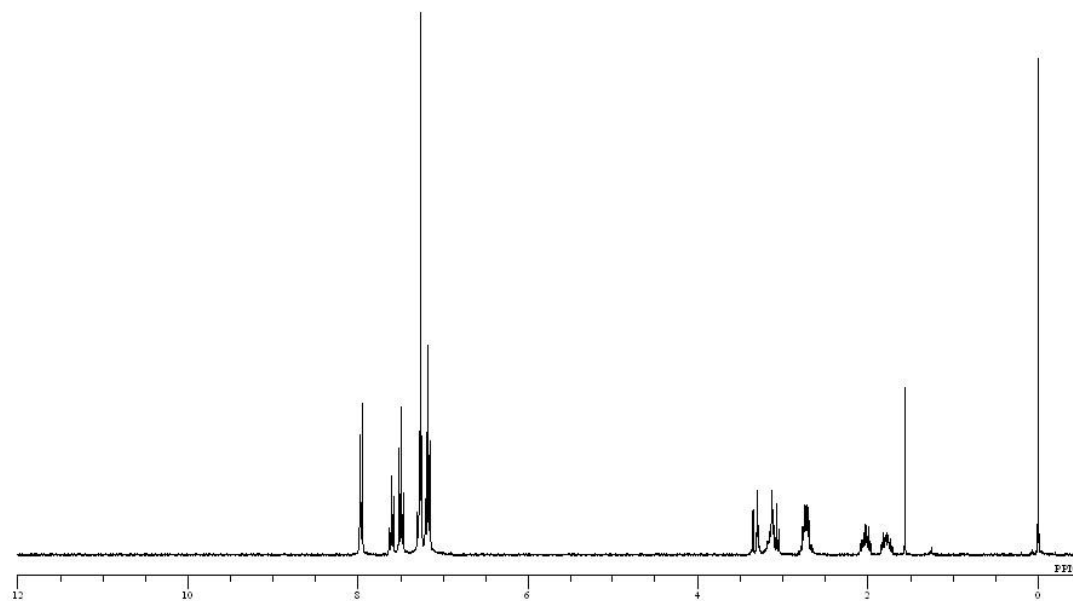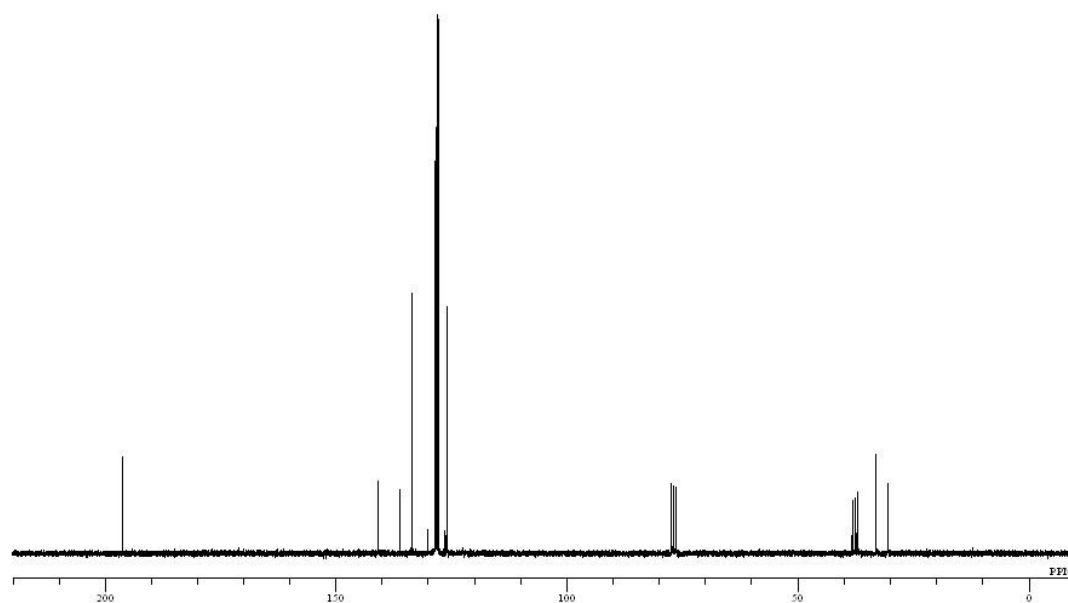

**1-(4-Methoxyphenyl)-5-phenyl-3-(trifluoromethyl)pentan-1-one (7f)**

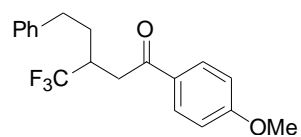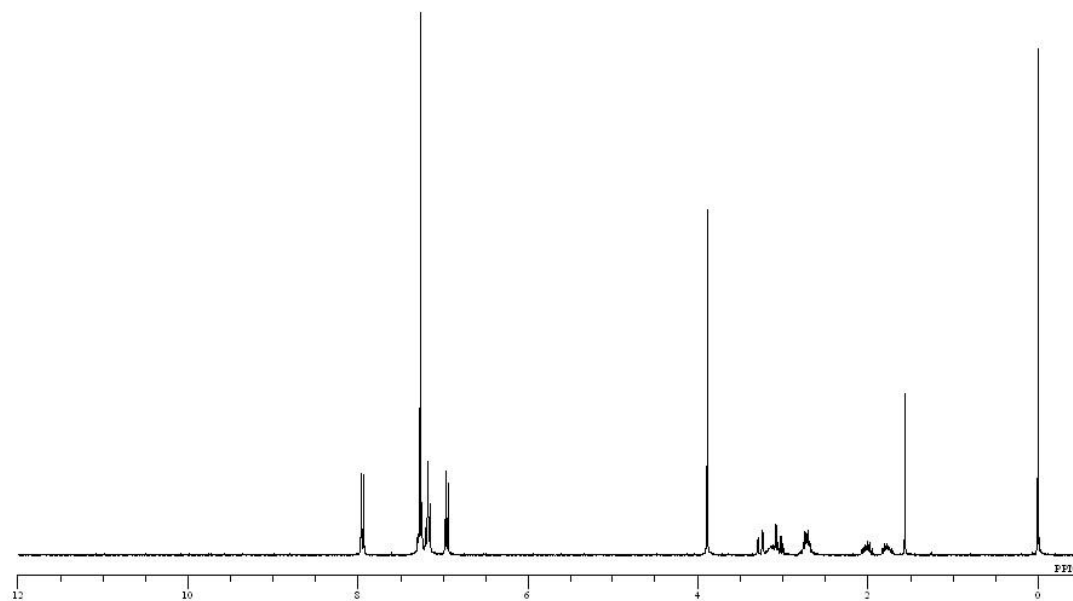



**1-(4-Bromophenyl)-5-phenyl-3-(trifluoromethyl)pentan-1-one (7g)**

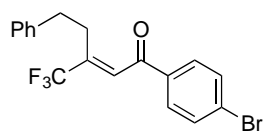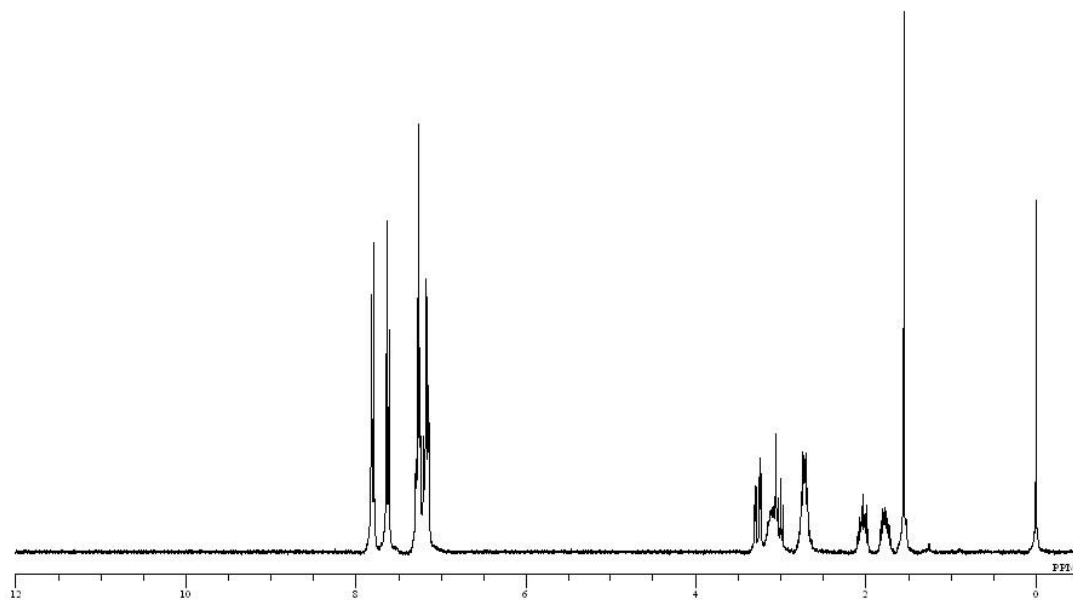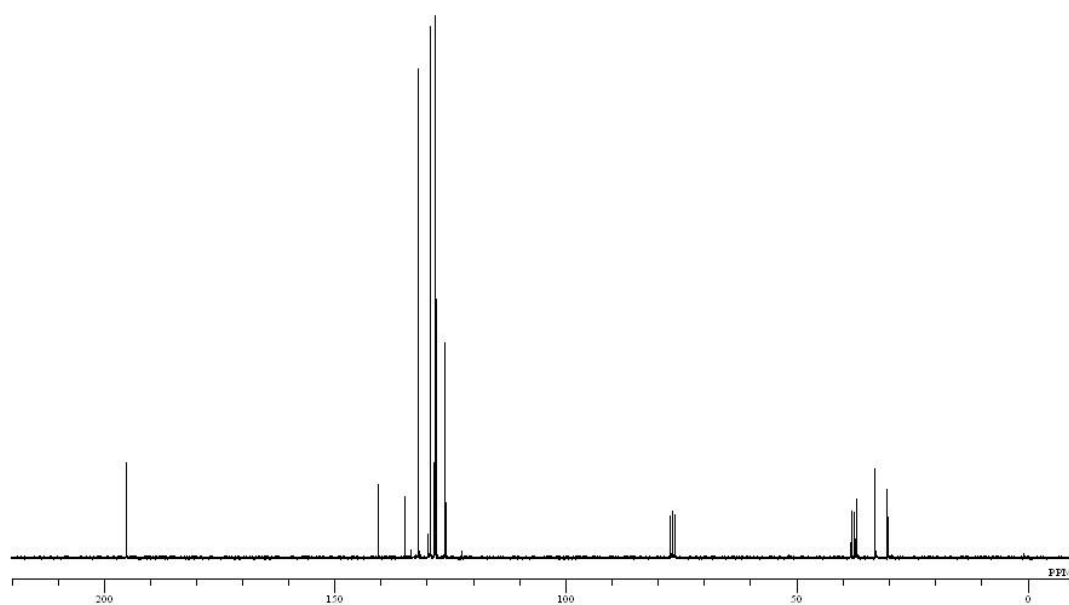

#### 4. HPLC Charts

(*E*)-4,4,4-Trifluoro-1,3-diphenylbut-2-en-1-ol ((*E*)-6a)

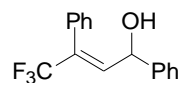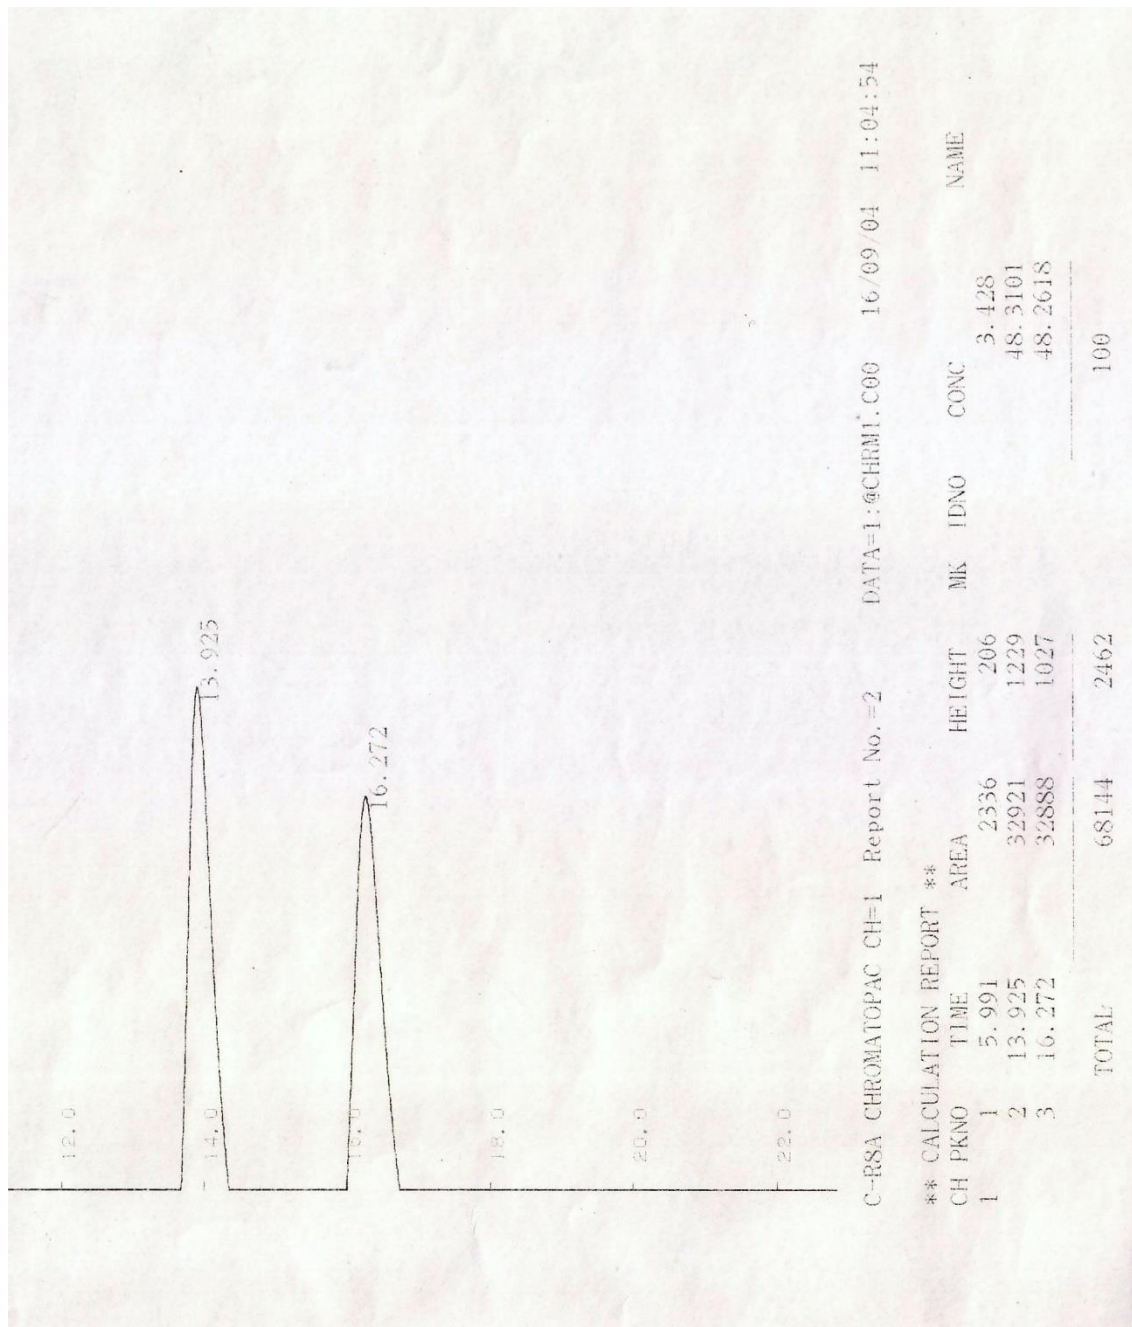

**(*R,E*)-4,4,4-Trifluoro-1,3-diphenylbut-2-en-1-ol ((*R,E*)-6a)**

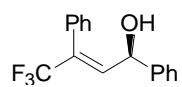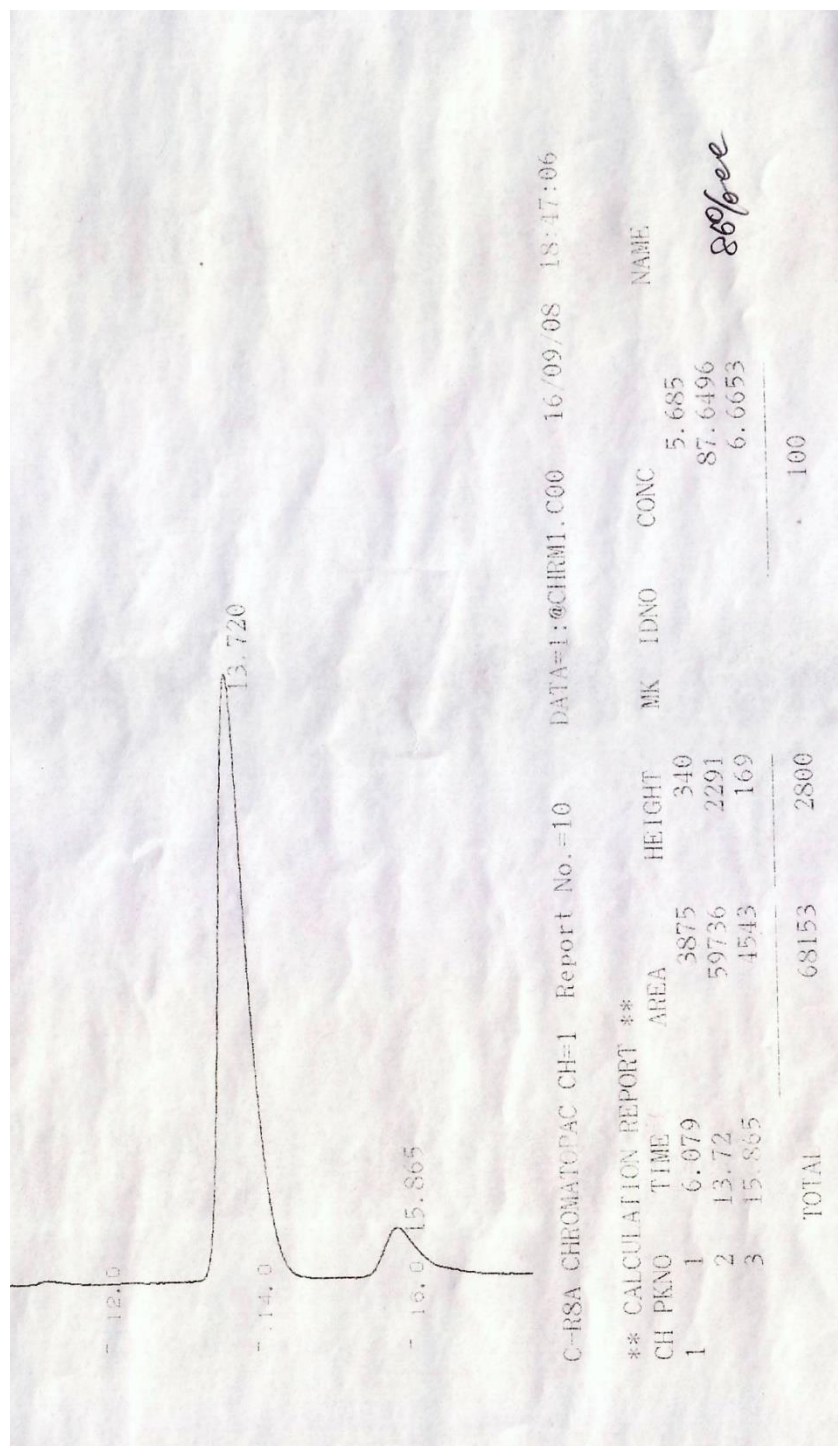

**(E)-4,4,4-Trifluoro-3-(4-methoxyphenyl)-1-phenylbut-2-en-1-ol ((E)-6b)**

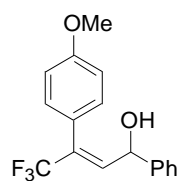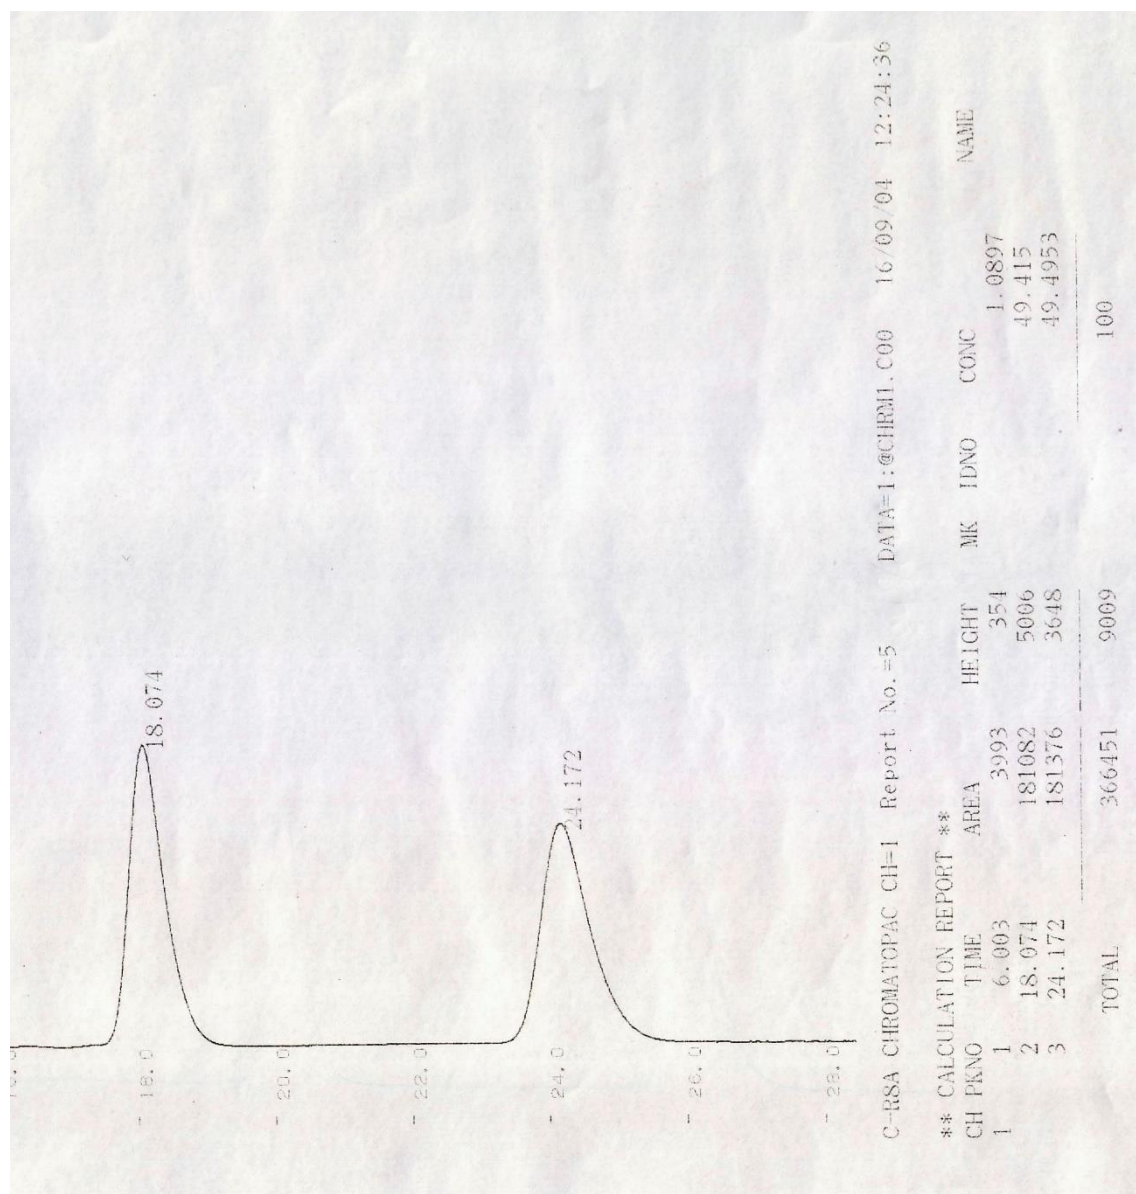



**(*R,E*)-4,4,4-Trifluoro-3-(4-methoxyphenyl)-1-phenylbut-2-en-1-ol ((*R,E*)-6b)**

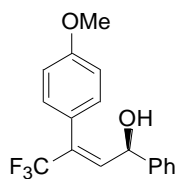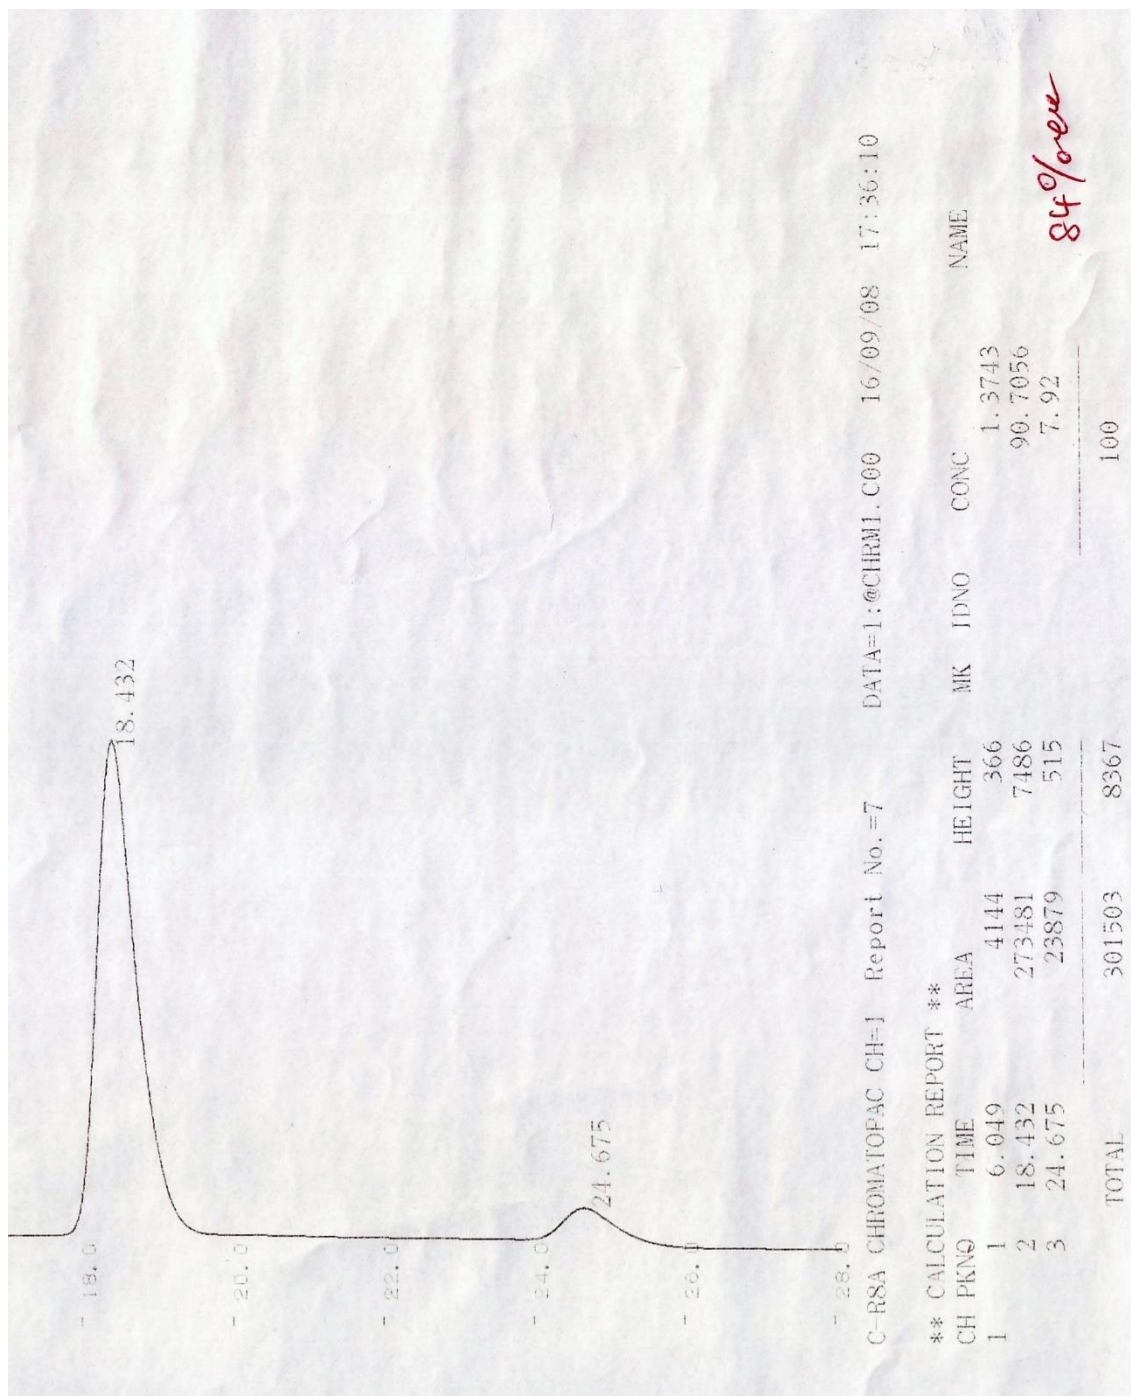

**(E)-4,4,4-Trifluoro-3-(4-fluorophenyl)-1-phenylbut-2-en-1-ol ((E)-6c)**

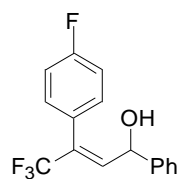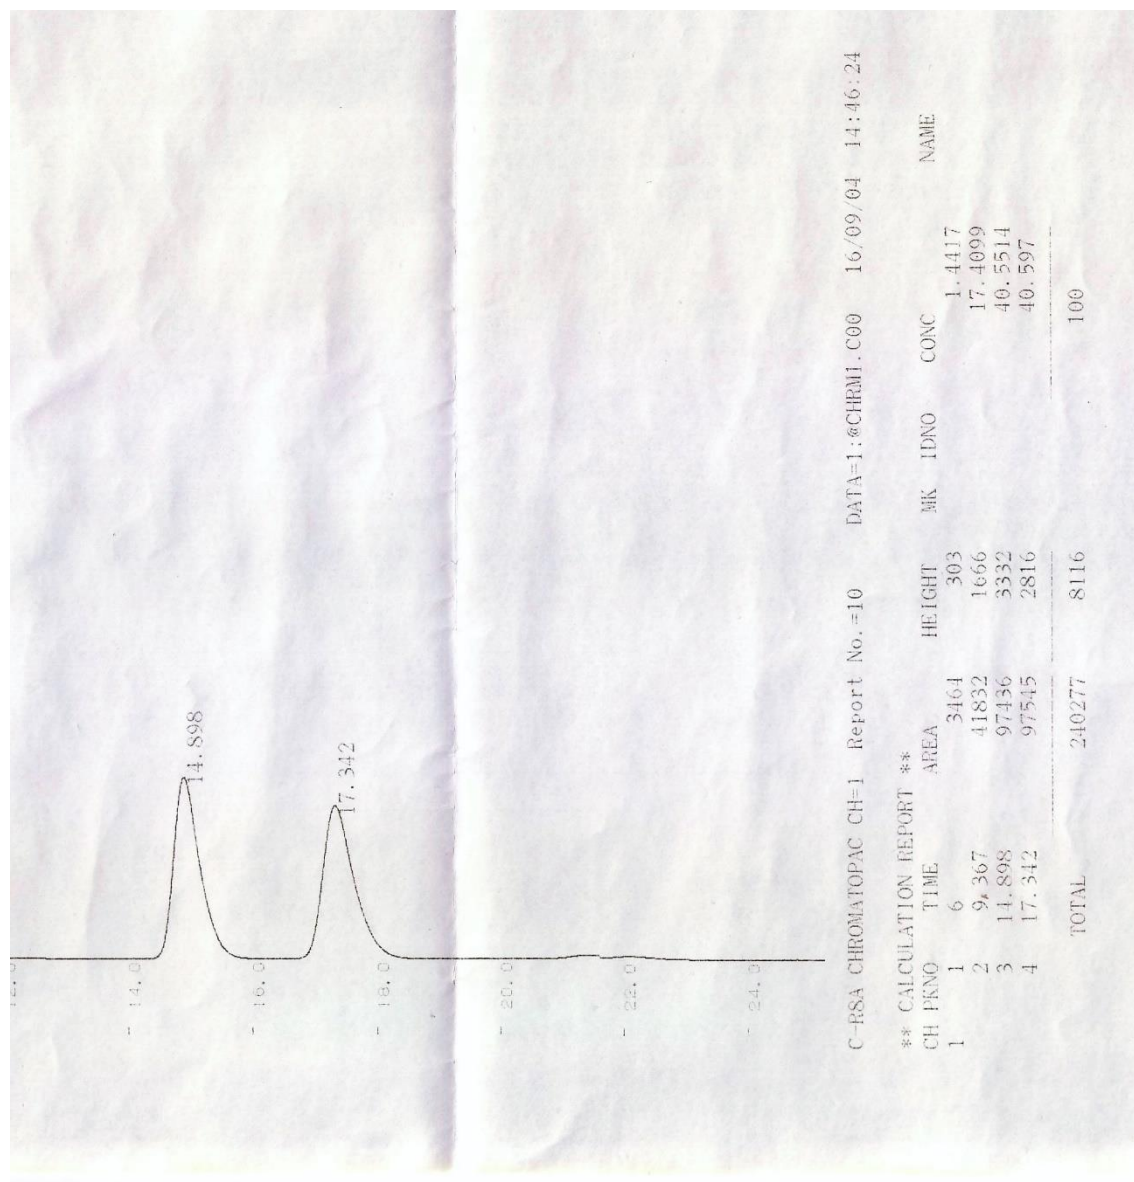

**(*R,E*)-4,4,4-Trifluoro-3-(4-fluorophenyl)-1-phenylbut-2-en-1-ol ((*R,E*)-6c)**

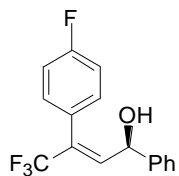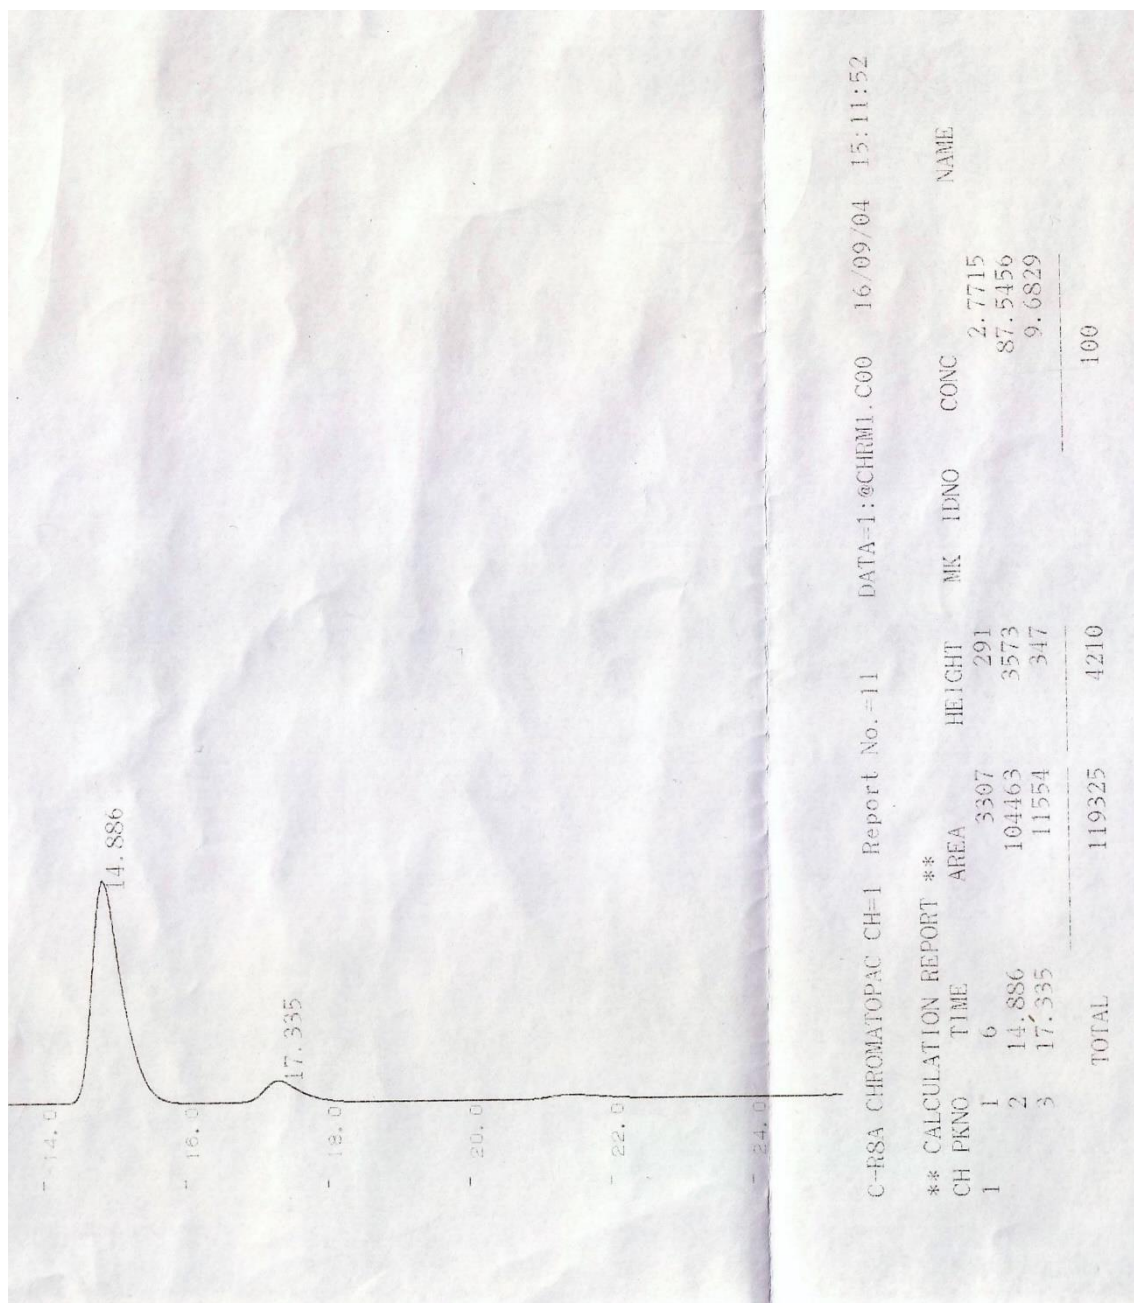

# 4,4,4-Trifluoro-1,3-diphenylbutan-1-one (7a)

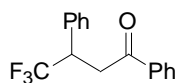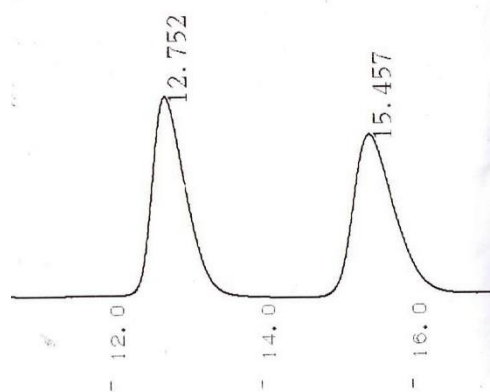

C-RSA CHROMATOPAC CH=1 Report No.=4 DATA=1:@CHRM1.C00 16/09/12 15:23:12

| ** CALCULATION REPORT ** |      |        |        | MK | IDNO | CONC    | NAME |
|--------------------------|------|--------|--------|----|------|---------|------|
| CH                       | PKNO | TIME   | AREA   |    |      |         |      |
| 1                        | 1    | 3.115  | 92694  |    |      | 25.3451 |      |
|                          | 2    | 5.807  | 88220  |    |      | 24.1216 |      |
|                          | 3    | 12.752 | 92500  |    |      | 25.2918 |      |
|                          | 4    | 15.457 | 92316  |    |      | 25.2415 |      |
| TOTAL                    |      |        | 365730 |    |      | 10949   |      |
|                          |      |        |        |    |      | 100     |      |



**(R)-4,4,4-Trifluoro-1,3-diphenylbutan-1-one ((R)-7a)**

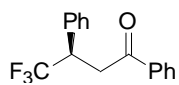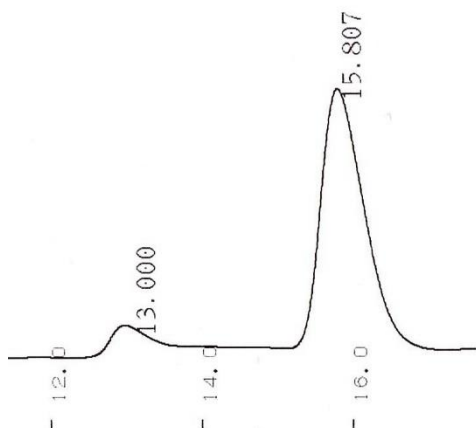

C-RSA CHROMATOPAC CH=1 Report No.=7 DATA=1:@CHRM1.C00 16/09/12 16:18:50

**\*\* CALCULATION REPORT \*\***

| CH    | PKNO   | TIME  | AREA | HEIGHT | MK | IDNO | CONC    | NAME  |     |
|-------|--------|-------|------|--------|----|------|---------|-------|-----|
| 1     | 1      | 3.107 | 1431 | 181    |    |      | 1.6694  | (571) |     |
| 2     | 13     | 13    | 6164 | 201    |    |      | 7.1887  |       |     |
| 3     | 15.807 | 78147 | 1970 |        |    |      | 91.1418 |       |     |
| TOTAL |        |       |      |        |    |      | 85742   | 2352  | 100 |

85% ee

**4,4,4-Trifluoro-3-(4-methoxyphenyl)-1-phenylbutan-1-one (7b)**

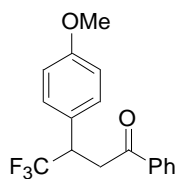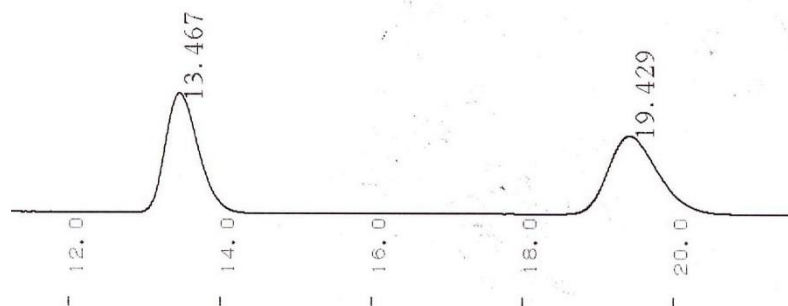

C-RSA CHROMATOPAC CH=1 Report No.=1 DATA=1:@CHRM1.C00 16/09/13 12:12:48

| ** CALCULATION REPORT ** |      |        |       |        |         |
|--------------------------|------|--------|-------|--------|---------|
| CH                       | PKNO | TIME   | AREA  | HEIGHT | MK      |
| 1                        | 1    | 3.074  | 1033  | 145    |         |
|                          | 2    | 5.827  | 2253  | 153    |         |
|                          | 3    | 13.467 | 55551 | 1816   |         |
|                          | 4    | 19.429 | 53920 | 1183   |         |
|                          |      |        |       |        | CONC    |
|                          |      |        |       |        | 0.9163  |
|                          |      |        |       |        | 1.9983  |
|                          |      |        |       |        | 49.2659 |
|                          |      |        |       |        | 47.8195 |

**(R)-4,4,4-Trifluoro-3-(4-methoxyphenyl)-1-phenylbutan-1-one ((R)-7b)**

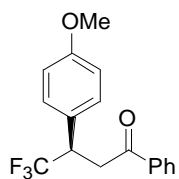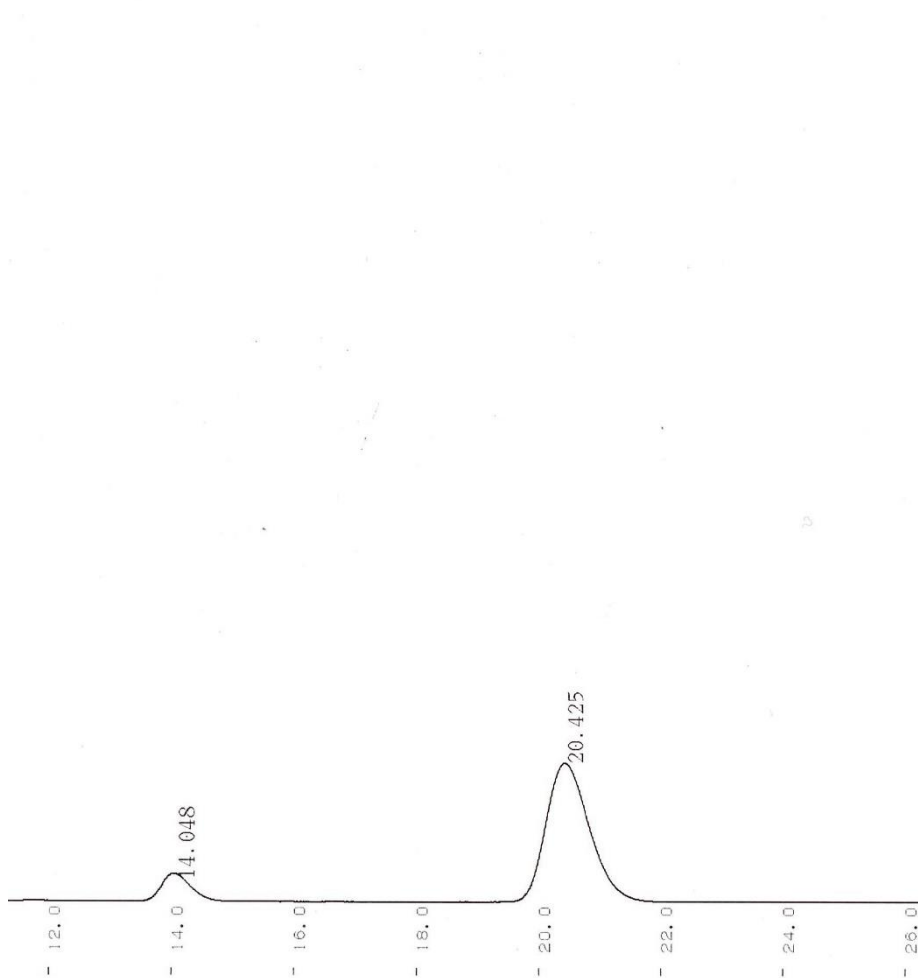

C-RSA CHROMATOPAC CH=1 Report No. =4 DATA=1:@CHRM1.C00 16/09/13 14:36:08

| ** CALCULATION REPORT ** |      |        |        |        |      |      |
|--------------------------|------|--------|--------|--------|------|------|
| CH                       | PKNO | TIME   | AREA   | HEIGHT | MK   | IDNO |
| 1                        | 1    | 3.091  | 1394   | 190    |      |      |
|                          | 2    | 14.048 | 16432  | 520    |      |      |
|                          | 3    | 20.425 | 127560 | 2594   |      |      |
| TOTAL                    |      |        |        | 145506 | 2594 | 100  |
|                          |      |        |        |        |      | 100  |

77% ee

**4,4,4-Trifluoro-3-(4-fluorophenyl)-1-phenylbutan-1-one (7c)**

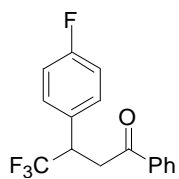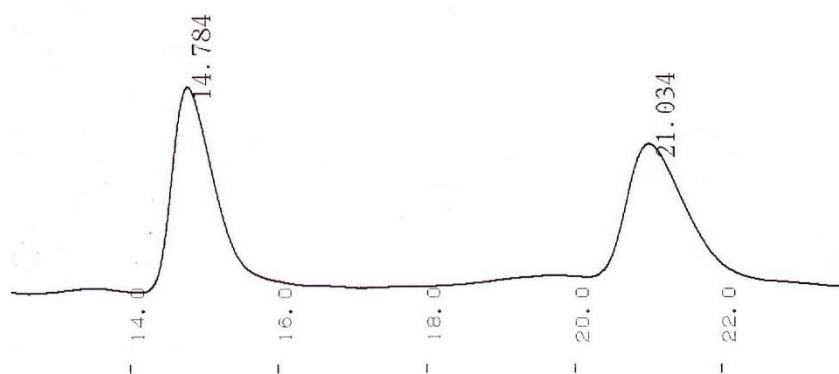

32.0

| CH | PKNO | TIME   | AREA  | HEIGHT | MK | IDNO | CONC    | NAME |
|----|------|--------|-------|--------|----|------|---------|------|
| 1  | 1    | 3.107  | 1356  | 167    |    |      | 1.0777  |      |
|    | 2    | 9.679  | 3567  | 135    |    |      | 2.8349  |      |
|    | 3    | 14.784 | 63480 | 1583   |    |      | 50.4464 |      |
|    | 4    | 21.034 | 57433 | 1039   |    |      | 45.641  |      |

C-RSA CHROMATOPAC CH=1 Report No.=9 DATA=1:@CHRM1.C00 16/09/12 17:28:18

\*\* CALCULATION REPORT \*\*

**(R)-4,4,4-Trifluoro-3-(4-fluorophenyl)-1-phenylbutan-1-one ((R)-7c)**

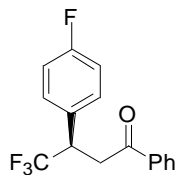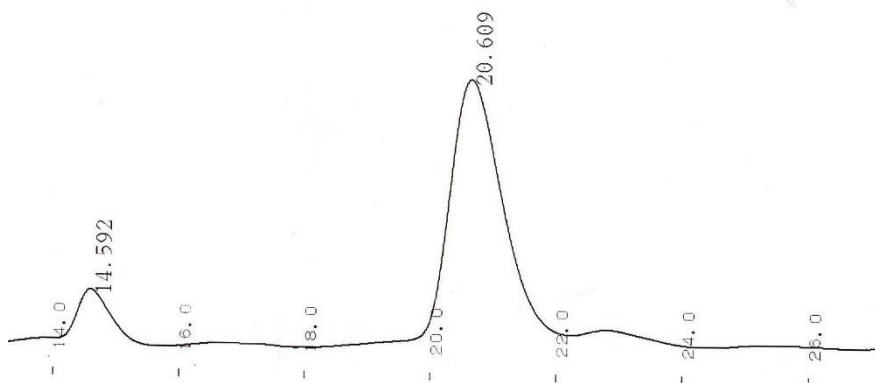

C-RSA CHROMATOPAC CH=1 Report No.=10 DATA=1:@CHRM1.C00 16/09/12 18:00:36

| ** CALCULATION REPORT ** |      |        |        |        |    |      |
|--------------------------|------|--------|--------|--------|----|------|
| CH                       | PKNO | TIME   | AREA   | HEIGHT | MK | IDNO |
| 1                        | 1    | 3.106  | 1381   | 171    |    |      |
|                          | 2    | 14.592 | 16317  | 468    |    |      |
|                          | 3    | 20.609 | 132010 | 2353   |    |      |
| TOTAL                    |      |        |        | 149708 |    | 2992 |
|                          |      |        |        |        |    | 100  |

78% ee

## 5. Computational Details

Full optimization for each compounds was carried out by Gaussian 09W [32] software using the B3LYP/6-311++G\*\* level of theory, and the solvent effect was obtained as the single point calculation by the polarizable continuum model using the integral equation formalism variant (IEFPCM) or the conductor-like polarizable continuum model (CPCM). Frequency calculation was also performed for confirmation of optimized stationary points and transition state model by no and 1 negative frequency, respectively.

### 1Fa

E = -568.396577048, -568.403758070 (in THF)

|     |         |         |         |
|-----|---------|---------|---------|
| C1  | 2.9357  | 1.2128  | 0.1820  |
| H2  | 2.5416  | 2.0942  | -0.3284 |
| H3  | 4.0177  | 1.1852  | 0.0327  |
| H4  | 2.7260  | 1.2941  | 1.2498  |
| C5  | 2.3112  | -0.0655 | -0.3889 |
| H6  | 2.5256  | -0.1233 | -1.4640 |
| C7  | 0.8536  | -0.0643 | -0.2402 |
| C8  | -0.3414 | -0.0310 | -0.1254 |
| C9  | -1.7841 | 0.0049  | 0.0141  |
| O10 | 2.7988  | -1.2455 | 0.2629  |
| H11 | 3.7377  | -1.3282 | 0.0575  |
| F12 | -2.2004 | -0.6445 | 1.1259  |
| F13 | -2.2512 | 1.2733  | 0.0994  |
| F14 | -2.4138 | -0.5731 | -1.0364 |

### 3F-Ca

E = -567.829356193, -567.901266570 (in THF)

|    |        |         |         |
|----|--------|---------|---------|
| C1 | 2.9283 | -1.1541 | 0.0969  |
| H2 | 2.3860 | -2.0791 | -0.1032 |
| H3 | 3.3114 | -1.1975 | 1.1247  |
| H4 | 3.7997 | -1.1136 | -0.5702 |

|     |         |         |         |
|-----|---------|---------|---------|
| C5  | 2.0370  | 0.0310  | -0.1071 |
| C6  | 0.7666  | 0.0165  | -0.4666 |
| C7  | -0.4371 | 0.0285  | -0.9527 |
| C8  | -1.5888 | -0.0177 | -0.0595 |
| O9  | 2.7374  | 1.2429  | 0.1404  |
| H10 | 2.1350  | 1.9730  | -0.0425 |
| F11 | -2.4107 | 1.0816  | -0.1988 |
| F12 | -2.4038 | -1.1041 | -0.3022 |
| F13 | -1.3819 | -0.0831 | 1.3234  |

### 3F-Oa

E = -567.823099021, -567.899844205 (in THF)

|     |         |         |         |
|-----|---------|---------|---------|
| C1  | -3.0296 | 1.1395  | -0.1747 |
| H2  | -2.6690 | 2.0245  | 0.3634  |
| H3  | -4.1135 | 1.0696  | -0.0515 |
| H4  | -2.8107 | 1.2563  | -1.2403 |
| C5  | -2.3976 | -0.1775 | 0.3550  |
| H6  | -2.5905 | -0.1734 | 1.4583  |
| C7  | -0.9082 | -0.0452 | 0.2579  |
| C8  | 0.2954  | -0.0159 | 0.1362  |
| C9  | 1.7225  | 0.0140  | -0.0116 |
| O10 | -2.8355 | -1.3003 | -0.2678 |
| F11 | 2.1634  | -0.7087 | -1.0795 |
| F12 | 2.2100  | 1.2762  | -0.1906 |
| F13 | 2.3791  | -0.4857 | 1.0741  |

### 1Fb

E = -760.176083913, -760.183467700 (in THF)

|    |         |        |         |
|----|---------|--------|---------|
| C1 | -0.6070 | 1.4656 | -0.2595 |
| H2 | -0.6673 | 1.9307 | -1.2515 |
| C3 | 0.7024  | 0.8123 | -0.1692 |
| C4 | 1.7701  | 0.2645 | -0.1238 |

|     |         |         |         |
|-----|---------|---------|---------|
| C5  | 3.0535  | −0.4089 | −0.0705 |
| O6  | −0.6404 | 2.4774  | 0.7560  |
| H7  | −1.5021 | 2.9101  | 0.7067  |
| C8  | −1.7449 | 0.4597  | −0.1316 |
| C9  | −2.6171 | 0.2536  | −1.2018 |
| C10 | −1.9337 | −0.2492 | 1.0602  |
| C11 | −3.6706 | −0.6546 | −1.0857 |
| H12 | −2.4761 | 0.8020  | −2.1274 |
| C13 | −2.9870 | −1.1512 | 1.1767  |
| H14 | −1.2594 | −0.0907 | 1.8942  |
| C15 | −3.8567 | −1.3569 | 0.1030  |
| H16 | −4.3439 | −0.8085 | −1.9212 |
| H17 | −3.1290 | −1.6969 | 2.1025  |
| H18 | −4.6755 | −2.0612 | 0.1954  |
| F19 | 4.0838  | 0.4394  | −0.2969 |
| F20 | 3.2763  | −0.9827 | 1.1349  |
| F21 | 3.1423  | −1.3916 | −0.9973 |

### 3F-Cb

E = −759.630921556, −759.695201006 (in THF)

|     |         |         |         |
|-----|---------|---------|---------|
| C1  | 0.4261  | 1.0959  | −0.1989 |
| C2  | −0.7851 | 0.6009  | −0.4672 |
| C3  | −1.9199 | 0.1686  | −0.8740 |
| C4  | −2.9846 | −0.2983 | 0.0004  |
| O5  | 0.6060  | 2.4896  | −0.0080 |
| H6  | −0.2319 | 2.9195  | −0.2103 |
| C7  | 1.6514  | 0.3221  | −0.0861 |
| C8  | 1.6498  | −1.0851 | −0.2239 |
| C9  | 2.8913  | 0.9505  | 0.1589  |
| C10 | 2.8251  | −1.8173 | −0.1307 |
| H11 | 0.7106  | −1.5955 | −0.4061 |
| C12 | 4.0665  | 0.2061  | 0.2547  |
| H13 | 2.9247  | 2.0265  | 0.2694  |
| C14 | 4.0490  | −1.1808 | 0.1109  |



|     |         |         |         |
|-----|---------|---------|---------|
| H15 | 2.7895  | -2.8962 | -0.2441 |
| H16 | 5.0047  | 0.7187  | 0.4431  |
| H17 | 4.9646  | -1.7565 | 0.1861  |
| F18 | -2.7829 | -0.2435 | 1.3776  |
| F19 | -4.1554 | 0.4019  | -0.1789 |
| F20 | -3.3093 | -1.6149 | -0.2252 |

### 3F-Ob

E = -759.610861467, -759.682660875 (in THF)

|     |         |         |         |
|-----|---------|---------|---------|
| C1  | -0.6196 | 1.3903  | -0.7080 |
| H2  | -0.6589 | 1.4164  | -1.8275 |
| C3  | 0.6748  | 0.6859  | -0.4194 |
| C4  | 1.7581  | 0.2186  | -0.1532 |
| C5  | 3.0412  | -0.3431 | 0.1622  |
| O6  | -0.6503 | 2.6075  | -0.1320 |
| C7  | -1.7718 | 0.4199  | -0.3155 |
| C8  | -1.9424 | -0.8136 | -0.9538 |
| C9  | -2.6784 | 0.7984  | 0.6726  |
| C10 | -2.9944 | -1.6582 | -0.6026 |
| H11 | -1.2471 | -1.1163 | -1.7323 |
| C12 | -3.7342 | -0.0444 | 1.0298  |
| H13 | -2.5369 | 1.7644  | 1.1427  |
| C14 | -3.8956 | -1.2754 | 0.3948  |
| H15 | -3.1148 | -2.6119 | -1.1064 |
| H16 | -4.4325 | 0.2616  | 1.8024  |
| H17 | -4.7157 | -1.9304 | 0.6691  |
| F18 | 4.0791  | 0.4404  | -0.2456 |
| F19 | 3.2213  | -0.5381 | 1.4982  |
| F20 | 3.2422  | -1.5594 | -0.4229 |

### 1Ha

E = -270.587474540, -270.594534928 (in THF)

|     |         |         |         |
|-----|---------|---------|---------|
| C1  | -1.7619 | 1.2009  | -0.1789 |
| H2  | -1.3771 | 2.0913  | 0.3238  |
| H3  | -2.8426 | 1.1575  | -0.0168 |
| H4  | -1.5681 | 1.2879  | -1.2499 |
| C5  | -1.0959 | -0.0610 | 0.3815  |
| H6  | -1.3062 | -0.1236 | 1.4575  |
| C7  | 0.3570  | -0.0458 | 0.2008  |
| C8  | 1.5532  | -0.0049 | 0.0599  |
| C9  | 3.0008  | 0.0365  | -0.1136 |
| O10 | -1.6057 | -1.2500 | -0.2581 |
| H11 | -2.5487 | -1.3048 | -0.0623 |
| H12 | 3.3178  | 0.9861  | -0.5534 |
| H13 | 3.5166  | -0.0818 | 0.8432  |
| H14 | 3.3345  | -0.7671 | -0.7758 |

### 3H-Ca

E = -269.970093212, -270.047887418 (in THF)

|     |         |         |         |
|-----|---------|---------|---------|
| C1  | 1.8936  | -1.1257 | 0.0959  |
| H2  | 1.3690  | -2.0748 | -0.0252 |
| H3  | 2.4049  | -1.1433 | 1.0689  |
| H4  | 2.6815  | -1.0710 | -0.6709 |
| C5  | 0.9332  | 0.0178  | -0.0176 |
| C6  | -0.3658 | -0.0230 | -0.2860 |
| C7  | -1.6072 | -0.0359 | -0.6623 |
| C8  | -2.7424 | -0.0842 | 0.3439  |
| O9  | 1.6367  | 1.2654  | 0.1269  |
| H10 | 0.9896  | 1.9635  | -0.0238 |
| H11 | -2.4232 | -0.1091 | 1.4030  |
| H12 | -3.4069 | 0.7803  | 0.2191  |
| H13 | -3.3765 | -0.9629 | 0.1702  |

### 3H-Oa

E = -269.987804539, -270.078085013 (in THF)

|    |         |        |         |
|----|---------|--------|---------|
| C1 | -1.8318 | 1.1392 | -0.1656 |
|----|---------|--------|---------|

|     |         |         |         |
|-----|---------|---------|---------|
| H2  | -1.4530 | 2.0257  | 0.3590  |
| H3  | -2.9136 | 1.0766  | -0.0132 |
| H4  | -1.6427 | 1.2569  | -1.2378 |
| C5  | -1.1783 | -0.1768 | 0.3436  |
| H6  | -1.3556 | -0.1731 | 1.4505  |
| C7  | 0.3110  | -0.0432 | 0.2062  |
| C8  | 1.5127  | 0.0112  | 0.0653  |
| C9  | 2.9634  | 0.0624  | -0.1129 |
| O10 | -1.6724 | -1.2961 | -0.2615 |
| H11 | 3.4810  | 0.1938  | 0.8427  |
| H12 | 3.3411  | -0.8599 | -0.5660 |
| H13 | 3.2591  | 0.8921  | -0.7629 |

### **<sup>1</sup>Hb**

E = -462.367245869, -462.374910305 (in THF)

|     |         |         |         |
|-----|---------|---------|---------|
| C1  | 0.7215  | 1.1462  | -0.1593 |
| H2  | 0.7228  | 1.7432  | -1.0802 |
| C3  | 1.8780  | 0.2494  | -0.1953 |
| C4  | 2.8271  | -0.4907 | -0.2556 |
| C5  | 3.9731  | -1.3894 | -0.3213 |
| O6  | 0.8883  | 2.0306  | 0.9701  |
| H7  | 0.1270  | 2.6240  | 0.9878  |
| H8  | 4.5844  | -1.1842 | -1.2043 |
| H9  | 4.6082  | -1.2728 | 0.5611  |
| H10 | 3.6513  | -2.4334 | -0.3677 |
| C11 | -0.6018 | 0.3918  | -0.0930 |
| C12 | -1.5544 | 0.5612  | -1.0995 |
| C13 | -0.8866 | -0.4588 | 0.9816  |
| C14 | -2.7764 | -0.1119 | -1.0396 |
| H15 | -1.3418 | 1.2199  | -1.9355 |
| C16 | -2.1061 | -1.1265 | 1.0453  |
| H17 | -0.1507 | -0.5953 | 1.7661  |
| C18 | -3.0542 | -0.9562 | 0.0329  |
| H19 | -3.5076 | 0.0265  | -1.8281 |
| H20 | -2.3181 | -1.7833 | 1.8816  |

|     |         |         |        |
|-----|---------|---------|--------|
| H21 | -4.0024 | -1.4794 | 0.0827 |
|-----|---------|---------|--------|

### 3H-Cb

E = -461.781456797, -461.849393931 (in THF)

|     |         |         |         |
|-----|---------|---------|---------|
| C1  | -0.7357 | 0.8308  | -0.0329 |
| C2  | -1.9142 | 0.1603  | -0.1598 |
| C3  | -3.0016 | -0.4108 | -0.4295 |
| C4  | -4.1424 | -1.0465 | 0.2873  |
| O5  | -0.7629 | 2.2648  | 0.0427  |
| H6  | -1.6305 | 2.5372  | -0.2737 |
| H7  | -4.0458 | -1.0333 | 1.3850  |
| H8  | -5.0861 | -0.5512 | 0.0335  |
| H9  | -4.2642 | -2.0907 | -0.0209 |
| C10 | 0.5713  | 0.2579  | -0.0092 |
| C11 | 0.7784  | -1.1524 | -0.0664 |
| C12 | 1.7441  | 1.0634  | 0.0738  |
| C13 | 2.0505  | -1.7011 | -0.0495 |
| H14 | -0.0876 | -1.8032 | -0.1255 |
| C15 | 3.0144  | 0.4954  | 0.0927  |
| H16 | 1.6359  | 2.1394  | 0.1186  |
| C17 | 3.1943  | -0.8899 | 0.0326  |
| H18 | 2.1594  | -2.7811 | -0.0987 |
| H19 | 3.8810  | 1.1482  | 0.1553  |
| H20 | 4.1867  | -1.3260 | 0.0493  |

### 3H-Ob

E = -461.778352466, -461.861828646 (in THF)

|    |         |         |         |
|----|---------|---------|---------|
| C1 | -0.7448 | 1.0495  | 0.6889  |
| H2 | -0.7716 | 0.9682  | 1.8065  |
| C3 | -1.8626 | 0.1568  | 0.2247  |
| C4 | -2.8055 | -0.4881 | -0.1759 |
| C5 | -3.9463 | -1.2587 | -0.6678 |
| O6 | -0.8706 | 2.3236  | 0.2477  |
| H7 | -4.5995 | -1.5752 | 0.1516  |

|     |         |         |         |
|-----|---------|---------|---------|
| H8  | -4.5531 | -0.6685 | -1.3620 |
| H9  | -3.6233 | -2.1598 | -1.1986 |
| C10 | 0.5932  | 0.3488  | 0.3087  |
| C11 | 0.9854  | -0.8532 | 0.9102  |
| C12 | 1.4441  | 0.9326  | -0.6293 |
| C13 | 2.1936  | -1.4633 | 0.5760  |
| H14 | 0.3364  | -1.3156 | 1.6494  |
| C15 | 2.6543  | 0.3243  | -0.9740 |
| H16 | 1.1362  | 1.8743  | -1.0699 |
| C17 | 3.0348  | -0.8759 | -0.3734 |
| H18 | 2.4825  | -2.3931 | 1.0560  |
| H19 | 3.3041  | 0.7907  | -1.7082 |
| H20 | 3.9764  | -1.3468 | -0.6353 |

## 2Fa

E = -569.662705667, -569.669891067 (in THF)

|     |         |         |         |
|-----|---------|---------|---------|
| C1  | 2.8704  | 1.2120  | 0.1179  |
| H2  | 2.3726  | 2.1072  | -0.2624 |
| H3  | 3.8998  | 1.2151  | -0.2527 |
| H4  | 2.8938  | 1.2586  | 1.2096  |
| C5  | 2.1445  | -0.0506 | -0.3538 |
| H6  | 2.1145  | -0.0655 | -1.4499 |
| C7  | -1.7288 | 0.0068  | -0.0186 |
| O8  | 2.7962  | -1.2397 | 0.1242  |
| H9  | 3.7286  | -1.1928 | -0.1169 |
| F10 | -1.7824 | -0.1629 | 1.3197  |
| F11 | -2.3820 | 1.1702  | -0.2921 |
| F12 | -2.4845 | -0.9810 | -0.5702 |
| C13 | -0.3448 | 0.0123  | -0.5705 |
| H14 | -0.2997 | 0.1269  | -1.6484 |
| C15 | 0.7429  | -0.1041 | 0.1835  |
| H16 | 0.6560  | -0.2279 | 1.2594  |

**4F-Oa**

E = -569.080892049, -569.158580004 (in THF)

|     |         |         |         |
|-----|---------|---------|---------|
| C1  | -3.0643 | -1.0846 | 0.0790  |
| H2  | -2.6676 | -2.0223 | -0.3322 |
| H3  | -4.0901 | -0.9537 | -0.2805 |
| H4  | -3.0975 | -1.1659 | 1.1715  |
| C5  | -2.2240 | 0.1483  | -0.3352 |
| H6  | -2.1605 | 0.1164  | -1.4508 |
| C7  | 1.6740  | -0.0234 | -0.0221 |
| O8  | -2.7153 | 1.3341  | 0.1409  |
| F9  | 1.7373  | -0.0986 | 1.3290  |
| F10 | 2.4117  | -1.0782 | -0.4963 |
| F11 | 2.3981  | 1.0877  | -0.3724 |
| C12 | 0.3000  | -0.0059 | -0.5690 |
| H13 | 0.2596  | 0.0359  | -1.6533 |
| C14 | -0.8063 | -0.0091 | 0.1821  |
| H15 | -0.7208 | -0.0326 | 1.2670  |

**2Fb**

E = -761.442998032, -761.450752358 (in THF)

|     |         |         |         |
|-----|---------|---------|---------|
| C1  | -0.4857 | 1.2356  | -0.6039 |
| H2  | -0.3424 | 1.2246  | -1.690  |
| C3  | 2.9648  | -0.4257 | 0.0766  |
| O4  | -0.6198 | 2.5869  | -0.1408 |
| H5  | -1.4500 | 2.9417  | -0.4815 |
| C6  | -1.7019 | 0.3831  | -0.2654 |
| C7  | -2.2372 | -0.4846 | -1.2215 |
| C8  | -2.2869 | 0.4426  | 1.0052  |
| C9  | -3.3381 | -1.2841 | -0.9150 |
| H10 | -1.7947 | -0.5334 | -2.2112 |
| C11 | -3.3889 | -0.3532 | 1.3108  |
| H12 | -1.8857 | 1.1198  | 1.7507  |
| C13 | -3.9160 | -1.2201 | 0.3523  |

|     |         |         |         |
|-----|---------|---------|---------|
| H14 | -3.7467 | -1.9500 | -1.6666 |
| H15 | -3.8363 | -0.2974 | 2.2968  |
| H16 | -4.7738 | -1.8385 | 0.5911  |
| F17 | 4.1081  | 0.1664  | -0.3629 |
| F18 | 2.9497  | -0.2957 | 1.4203  |
| F19 | 3.1093  | -1.7536 | -0.1870 |
| C20 | 1.7627  | 0.1417  | -0.5968 |
| H21 | 1.7833  | 0.0627  | -1.6785 |
| C22 | 0.7493  | 0.6915  | 0.0635  |
| H23 | 0.7678  | 0.7593  | 1.1470  |

#### 4F-Cb

E = -760.881059270, -760.943671947 (in THF)

|     |         |         |         |
|-----|---------|---------|---------|
| C1  | -0.5236 | 1.1758  | -0.1071 |
| C2  | 2.9668  | -0.3555 | 0.0265  |
| O3  | -0.7837 | 2.5776  | -0.0735 |
| H4  | -1.3230 | 2.8091  | -0.8395 |
| C5  | -1.6855 | 0.3241  | -0.0354 |
| C6  | -1.6363 | -1.0821 | -0.2454 |
| C7  | -2.9748 | 0.8718  | 0.2149  |
| C8  | -2.7814 | -1.8681 | -0.1891 |
| H9  | -0.6976 | -1.5570 | -0.4885 |
| C10 | -4.1122 | 0.0745  | 0.2725  |
| H11 | -3.0689 | 1.9365  | 0.3876  |
| C12 | -4.0347 | -1.3071 | 0.0753  |
| H13 | -2.6944 | -2.9365 | -0.3629 |
| H14 | -5.0724 | 0.5382  | 0.4783  |
| H15 | -4.9228 | -1.9270 | 0.1221  |
| F16 | 3.5367  | -1.5409 | -0.3868 |
| F17 | 3.6017  | 0.6431  | -0.6719 |
| F18 | 3.5394  | -0.2055 | 1.3319  |
| C19 | 1.5318  | -0.3520 | -0.0563 |
| H20 | 1.0822  | -1.3077 | 0.1664  |
| C21 | 0.8203  | 0.8541  | -0.1388 |

|     |        |        |         |
|-----|--------|--------|---------|
| H22 | 1.4435 | 1.7413 | -0.2369 |
|-----|--------|--------|---------|

#### 4F-Ob

E = -760.870749534, -760.943160273 (in THF)

|     |         |         |         |
|-----|---------|---------|---------|
| C1  | -0.5091 | 1.2123  | -0.6736 |
| H2  | -0.3539 | 1.0430  | -1.7671 |
| C3  | 2.9994  | -0.3344 | 0.1313  |
| O4  | -0.5851 | 2.5248  | -0.3305 |
| C5  | -1.7512 | 0.3605  | -0.3131 |
| C6  | -1.9150 | -0.9419 | -0.8033 |
| C7  | -2.7418 | 0.8885  | 0.5163  |
| C8  | -3.0370 | -1.6990 | -0.4693 |
| H9  | -1.1567 | -1.3661 | -1.4561 |
| C10 | -3.8678 | 0.1349  | 0.8574  |
| H11 | -2.6078 | 1.9036  | 0.8721  |
| C12 | -4.0200 | -1.1620 | 0.3668  |
| H13 | -3.1486 | -2.7051 | -0.8611 |
| H14 | -4.6294 | 0.5613  | 1.5030  |
| H15 | -4.8951 | -1.7480 | 0.6272  |
| F16 | 4.1286  | 0.3463  | -0.2423 |
| F17 | 2.9281  | -0.2329 | 1.4793  |
| F18 | 3.2842  | -1.6494 | -0.1361 |
| C19 | 1.7901  | 0.1347  | -0.5808 |
| H20 | 1.8653  | 0.0737  | -1.6622 |
| C21 | 0.6982  | 0.6059  | 0.0293  |
| H22 | 0.6635  | 0.6648  | 1.1147  |

#### 2Ha

E = -271.839948035, -271.845389714 (in THF)

|    |         |        |         |
|----|---------|--------|---------|
| C1 | -1.8333 | 1.1797 | -0.0917 |
| H2 | -1.3610 | 2.0914 | 0.2831  |
| H3 | -2.8429 | 1.1272 | 0.3288  |



|     |         |         |         |
|-----|---------|---------|---------|
| H4  | -1.9154 | 1.2516  | -1.1799 |
| C5  | -1.0136 | -0.0498 | 0.3063  |
| H6  | -0.9263 | -0.0873 | 1.3997  |
| C7  | 2.8763  | 0.0446  | -0.1610 |
| O8  | -1.6559 | -1.2613 | -0.1544 |
| H9  | -2.5768 | -1.2421 | 0.1307  |
| C10 | 1.4922  | -0.0052 | 0.4150  |
| H11 | 1.4257  | -0.0165 | 1.5027  |
| C12 | 0.3630  | -0.0322 | -0.2923 |
| H13 | 0.3999  | -0.0286 | -1.3814 |
| H14 | 3.4689  | -0.8147 | 0.1716  |
| H15 | 3.4095  | 0.9405  | 0.1758  |
| H16 | 2.8584  | 0.0471  | -1.2533 |

#### **4H-Ca**

E = -271.204717656, -271.279129958 (in THF)

|     |         |         |         |
|-----|---------|---------|---------|
| C1  | 1.5202  | 1.3037  | 0.0259  |
| H2  | 0.9167  | 2.0515  | -0.5004 |
| H3  | 2.5628  | 1.4616  | -0.2729 |
| H4  | 1.4533  | 1.5539  | 1.1109  |
| C5  | 1.0452  | -0.0869 | -0.2906 |
| C6  | -2.8293 | -0.1584 | 0.0093  |
| O7  | 1.9789  | -1.1061 | 0.2033  |
| H8  | 2.6154  | -1.2634 | -0.4971 |
| C9  | -1.4198 | 0.3754  | 0.0949  |
| H10 | -1.3116 | 1.4579  | 0.0378  |
| C11 | -0.3027 | -0.4275 | -0.0766 |
| H12 | -0.4856 | -1.5064 | -0.0465 |
| H13 | -3.3073 | -0.0184 | -0.9793 |
| H14 | -3.5065 | 0.3111  | 0.7359  |
| H15 | -2.8500 | -1.2374 | 0.2079  |

#### **4H-Oa**

E = -271.235872940, -271.323498797 (in THF)

|     |         |         |         |
|-----|---------|---------|---------|
| C1  | -1.9163 | 1.1079  | -0.0882 |
| H2  | -1.4671 | 2.0344  | 0.2943  |
| H3  | -2.9296 | 1.0182  | 0.3185  |
| H4  | -1.9990 | 1.1850  | -1.1794 |
| C5  | -1.0958 | -0.1547 | 0.2895  |
| H6  | -0.9813 | -0.1123 | 1.4034  |
| C7  | 2.8362  | 0.0707  | -0.1673 |
| O8  | -1.6895 | -1.3165 | -0.1371 |
| C9  | 1.4509  | 0.0265  | 0.4202  |
| H10 | 1.3949  | 0.0178  | 1.5100  |
| C11 | 0.3112  | -0.0207 | -0.2753 |
| H12 | 0.3566  | -0.0343 | -1.3675 |
| H13 | 3.4376  | -0.7875 | 0.1574  |
| H14 | 3.3819  | 0.9688  | 0.1473  |
| H15 | 2.8043  | 0.0630  | -1.2605 |

## 2Hb

E = -463.620454871, -463.626716310 (in THF)

|     |         |         |         |
|-----|---------|---------|---------|
| C1  | 0.7565  | 0.7745  | -0.6212 |
| H2  | 0.9697  | 0.5098  | -1.6637 |
| C3  | 3.8659  | -1.2335 | 0.6643  |
| O4  | 0.8472  | 2.2057  | -0.4617 |
| H5  | 0.1162  | 2.6082  | -0.9462 |
| C6  | -0.6336 | 0.2596  | -0.2712 |
| C7  | -1.2643 | -0.6762 | -1.0964 |
| C8  | -1.2914 | 0.6910  | 0.8875  |
| C9  | -2.5247 | -1.1780 | -0.7711 |
| H10 | -0.7675 | -1.0138 | -2.0005 |
| C11 | -2.5515 | 0.1932  | 1.2129  |
| H12 | -0.8172 | 1.4243  | 1.5301  |
| C13 | -3.1716 | -0.7447 | 0.3855  |
| H14 | -3.0020 | -1.9011 | -1.4231 |
| H15 | -3.0504 | 0.5367  | 2.1125  |
| H16 | -4.1525 | -1.1310 | 0.6388  |
| C17 | 2.8124  | -0.5951 | -0.1907 |

|     |        |         |         |
|-----|--------|---------|---------|
| H18 | 2.8820 | −0.7857 | −1.2611 |
| C19 | 1.8156 | 0.1675  | 0.2581  |
| H20 | 1.7198 | 0.3777  | 1.3220  |
| H21 | 3.8468 | −2.3239 | 0.5592  |
| H22 | 4.8663 | −0.9075 | 0.3595  |
| H23 | 3.7314 | −0.9890 | 1.7204  |

#### 4H-Cb

E = −463.024162178, −463.090478358 (in THF)

|     |         |         |         |
|-----|---------|---------|---------|
| C1  | −0.6767 | 0.9547  | 0.0143  |
| C2  | −4.0691 | −1.0038 | −0.0362 |
| O3  | −0.6333 | 2.3908  | −0.0115 |
| H4  | −0.1987 | 2.6976  | 0.7939  |
| C5  | 0.5702  | 0.2937  | −0.0106 |
| C6  | 0.7241  | −1.1351 | 0.0694  |
| C7  | 1.8071  | 1.0283  | −0.0853 |
| C8  | 1.9726  | −1.7405 | 0.0768  |
| H9  | −0.1500 | −1.7639 | 0.1474  |
| C10 | 3.0429  | 0.3999  | −0.0812 |
| H11 | 1.7703  | 2.1078  | −0.1680 |
| C12 | 3.1593  | −0.9965 | 0.0001  |
| H13 | 2.0237  | −2.8246 | 0.1455  |
| H14 | 3.9401  | 1.0107  | −0.1471 |
| H15 | 4.1289  | −1.4815 | 0.0015  |
| C16 | −2.5758 | −0.7951 | −0.0643 |
| H17 | −1.9803 | −1.6908 | −0.1946 |
| C18 | −2.0045 | 0.4493  | 0.0299  |
| H19 | −2.7263 | 1.2645  | 0.1224  |
| H20 | −4.4474 | −1.4902 | −0.9479 |
| H21 | −4.3985 | −1.6373 | 0.8011  |
| H22 | −4.5964 | −0.0482 | 0.0595  |

#### 4H-Ob

E = −463.028204220, −463.108999137 (in THF)

|     |         |         |         |
|-----|---------|---------|---------|
| C1  | 0.7338  | 0.9510  | -0.5387 |
| H2  | 0.9427  | 0.6881  | -1.6074 |
| C3  | 3.9412  | -1.0824 | 0.6013  |
| O4  | 0.7691  | 2.2920  | -0.3009 |
| C5  | -0.6422 | 0.2911  | -0.2515 |
| C6  | -0.9102 | -1.0419 | -0.5940 |
| C7  | -1.6603 | 1.0330  | 0.3508  |
| C8  | -2.1546 | -1.6169 | -0.3393 |
| H9  | -0.1324 | -1.6358 | -1.0663 |
| C10 | -2.9089 | 0.4631  | 0.6149  |
| H11 | -1.4427 | 2.0672  | 0.5929  |
| C12 | -3.1628 | -0.8646 | 0.2712  |
| H13 | -2.3413 | -2.6500 | -0.6163 |
| H14 | -3.6868 | 1.0576  | 1.0849  |
| H15 | -4.1323 | -1.3089 | 0.4710  |
| C16 | 2.8460  | -0.4505 | -0.2149 |
| H17 | 2.9390  | -0.5485 | -1.2975 |
| C18 | 1.7996  | 0.2192  | 0.2752  |
| H19 | 1.7028  | 0.3454  | 1.3555  |
| H20 | 4.0137  | -2.1604 | 0.4127  |
| H21 | 4.9220  | -0.6570 | 0.3553  |
| H22 | 3.7719  | -0.9395 | 1.6722  |

#### DABCO

E = -345.421363954l, -345.424760724 (in toluene)

|     |         |         |        |
|-----|---------|---------|--------|
| N1  | 0.0000  | 0.0000  | 1.2859 |
| C2  | -0.0001 | 1.3852  | 0.7820 |
| H3  | -0.8819 | 1.8937  | 1.1831 |
| H4  | 0.8815  | 1.8939  | 1.1833 |
| C5  | -1.1996 | -0.6927 | 0.7820 |
| H6  | -1.1990 | -1.7106 | 1.1831 |
| H7  | -2.0809 | -0.1836 | 1.1833 |
| C8  | 1.1997  | -0.6925 | 0.7820 |
| H9  | 2.0809  | -0.1830 | 1.1831 |
| H10 | 1.1994  | -1.7103 | 1.1833 |

|     |         |         |         |
|-----|---------|---------|---------|
| C11 | 1.1996  | −0.6927 | −0.7820 |
| H12 | 2.0809  | −0.1836 | −1.1833 |
| H13 | 1.1990  | −1.7106 | −1.1831 |
| C14 | −1.1997 | −0.6925 | −0.7820 |
| H15 | −1.1994 | −1.7103 | −1.1833 |
| H16 | −2.0809 | −0.1831 | −1.1831 |
| N17 | 0.0000  | 0.0000  | −1.2859 |
| C18 | 0.0001  | 1.3852  | −0.7820 |
| H19 | 0.8819  | 1.8937  | −1.1831 |
| H20 | −0.8815 | 1.8939  | −1.1833 |

Substrate (***R,E***)-**6h** (R<sup>1</sup>: Ph, R<sup>2</sup>: Me in Table 3)

E = −800.769760546, −800.774966608 (in toluene)

|     |         |         |         |
|-----|---------|---------|---------|
| C1  | −1.6574 | 0.1078  | 0.4576  |
| C2  | −0.6256 | 0.7096  | −0.1369 |
| H3  | −0.6306 | 0.8235  | −1.2156 |
| C4  | −2.7876 | −0.4060 | −0.3984 |
| C5  | 0.6076  | 1.2629  | 0.5252  |
| H6  | 0.4804  | 1.2882  | 1.6122  |
| O7  | 0.7494  | 2.5988  | 0.0245  |
| H8  | 1.5983  | 2.9444  | 0.3231  |
| F9  | −3.9654 | 0.1888  | −0.0720 |
| F10 | −2.6098 | −0.2168 | −1.7200 |
| F11 | −2.9761 | −1.7406 | −0.2144 |
| C12 | −1.8460 | −0.1503 | 1.9296  |
| H13 | −2.8472 | 0.1507  | 2.2478  |
| H14 | −1.7403 | −1.2159 | 2.1546  |
| H15 | −1.1214 | 0.3970  | 2.5303  |
| C16 | 1.8221  | 0.3982  | 0.2080  |
| C17 | 2.3529  | −0.4565 | 1.1777  |
| C18 | 2.4116  | 0.4346  | −1.0611 |
| C19 | 3.4500  | −1.2659 | 0.8869  |
| H20 | 1.9086  | −0.4888 | 2.1677  |
| C21 | 3.5098  | −0.3708 | −1.3511 |
| H22 | 2.0136  | 1.1032  | −1.8160 |

|     |        |         |         |
|-----|--------|---------|---------|
| C23 | 4.0304 | -1.2251 | -0.3791 |
| H24 | 3.8537 | -1.9221 | 1.6498  |
| H25 | 3.9595 | -0.3329 | -2.3371 |
| H26 | 4.8854 | -1.8517 | -0.6064 |

Transition state **TS-8h**

E = -1146.14793316, -1146.16029984 (in toluene)

|     |         |         |         |
|-----|---------|---------|---------|
| C1  | 1.0036  | -2.0077 | 0.5781  |
| C2  | -0.2749 | -1.5964 | 0.1851  |
| H3  | -0.5089 | -1.8005 | -0.8550 |
| C4  | 1.9127  | -2.5133 | -0.4449 |
| C5  | -1.2822 | -0.8945 | 0.8393  |
| H6  | 0.4622  | 0.2805  | 0.1976  |
| O7  | -1.0116 | -0.3707 | 2.1312  |
| H8  | -1.6030 | -0.7824 | 2.7736  |
| F9  | 2.5839  | -3.6513 | -0.0991 |
| F10 | 1.3601  | -2.7420 | -1.6649 |
| F11 | 2.9869  | -1.6108 | -0.7374 |
| N12 | 0.8813  | 1.2228  | 0.0373  |
| C13 | -0.1338 | 2.2699  | 0.4114  |
| H14 | -1.0211 | 2.0839  | -0.1929 |
| H15 | -0.3982 | 2.0912  | 1.4525  |
| C16 | 1.2354  | 1.3351  | -1.4216 |
| H17 | 1.9355  | 0.5292  | -1.6396 |
| H18 | 0.3186  | 1.1636  | -1.9859 |
| C19 | 2.1205  | 1.3687  | 0.8794  |
| H20 | 1.8150  | 1.2316  | 1.9160  |
| H21 | 2.7872  | 0.5538  | 0.6020  |
| C22 | -2.5773 | -0.5666 | 0.2756  |
| C23 | -3.4439 | 0.3474  | 0.9279  |
| C24 | -3.0583 | -1.1305 | -0.9363 |
| C25 | -4.6826 | 0.6906  | 0.3920  |
| H26 | -3.1304 | 0.7995  | 1.8610  |
| C27 | -4.2877 | -0.7707 | -1.4676 |
| H28 | -2.4706 | -1.8805 | -1.4522 |

|     |         |         |         |
|-----|---------|---------|---------|
| C29 | -5.1185 | 0.1467  | -0.8146 |
| H30 | -5.3136 | 1.3932  | 0.9276  |
| H31 | -4.6150 | -1.2293 | -2.3954 |
| H32 | -6.0842 | 0.4121  | -1.2282 |
| C33 | 2.7090  | 2.7811  | 0.5917  |
| H34 | 2.7628  | 3.3708  | 1.5088  |
| H35 | 3.7217  | 2.7002  | 0.1925  |
| C36 | 1.8339  | 2.7552  | -1.6430 |
| H37 | 2.8469  | 2.6845  | -2.0429 |
| H38 | 1.2348  | 3.3191  | -2.3603 |
| N39 | 1.8800  | 3.5065  | -0.3813 |
| C40 | 0.5184  | 3.6587  | 0.1515  |
| H41 | 0.5716  | 4.2387  | 1.0748  |
| H42 | -0.0724 | 4.2335  | -0.5641 |
| C43 | 1.5412  | -2.0737 | 1.9924  |
| H44 | 1.0138  | -1.3775 | 2.6421  |
| H45 | 1.4273  | -3.0764 | 2.4256  |
| H46 | 2.6113  | -1.8410 | 2.0342  |

Product (**R**)-**7h** (R<sup>1</sup>: Ph, R<sup>2</sup>: Me in Table 3)

E = -800.803754065, -800.806147466 (in toluene)

|     |         |         |         |
|-----|---------|---------|---------|
| C1  | -1.8912 | 0.5690  | 0.0512  |
| C2  | -0.5463 | -0.1727 | 0.0347  |
| H3  | -0.5307 | -0.9256 | -0.7613 |
| C4  | -3.0294 | -0.4060 | -0.1956 |
| C5  | 0.6414  | 0.7570  | -0.2065 |
| H6  | -0.4035 | -0.7170 | 0.9729  |
| O7  | 0.4693  | 1.9213  | -0.5149 |
| H8  | -1.9123 | 1.2644  | -0.7923 |
| F9  | -4.2311 | 0.2135  | -0.2209 |
| F10 | -2.9004 | -1.0496 | -1.3836 |
| F11 | -3.1059 | -1.3701 | 0.7582  |
| C12 | -2.1147 | 1.3547  | 1.3512  |
| H13 | -3.0639 | 1.8920  | 1.3295  |
| H14 | -2.1167 | 0.6878  | 2.2174  |

|     |         |         |         |
|-----|---------|---------|---------|
| H15 | −1.3158 | 2.0859  | 1.4742  |
| C16 | 2.0248  | 0.1938  | −0.0787 |
| C17 | 2.2731  | −1.1491 | 0.2370  |
| C18 | 3.1111  | 1.0549  | −0.2930 |
| C19 | 3.5801  | −1.6200 | 0.3359  |
| H20 | 1.4538  | −1.8372 | 0.4045  |
| C21 | 4.4142  | 0.5847  | −0.1915 |
| H22 | 2.9078  | 2.0897  | −0.5393 |
| C23 | 4.6514  | −0.7546 | 0.1233  |
| H24 | 3.7613  | −2.6608 | 0.5788  |
| H25 | 5.2469  | 1.2586  | −0.3579 |
| H26 | 5.6685  | −1.1220 | 0.2020  |

# DABCO-H<sup>+</sup>

E = −345.802987802, −345.851815869 (in toluene)

|     |         |         |         |
|-----|---------|---------|---------|
| N1  | 1.2261  | 0.0032  | −0.0018 |
| C2  | 0.7392  | −0.7534 | −1.2257 |
| H3  | 1.1552  | −0.2512 | −2.0994 |
| H4  | 1.1558  | −1.7592 | −1.1656 |
| C5  | 0.7358  | 1.4401  | −0.0418 |
| H6  | 1.1535  | 1.9454  | 0.8294  |
| H7  | 1.1491  | 1.8939  | −0.9429 |
| C8  | 0.7428  | −0.6827 | 1.2644  |
| H9  | 1.1616  | −1.6893 | 1.2619  |
| H10 | 1.1591  | −0.1298 | 2.1068  |
| C11 | −0.8170 | −0.6629 | 1.2215  |
| H12 | −1.2098 | −1.6798 | 1.2473  |
| H13 | −1.2140 | −0.1327 | 2.0877  |
| C14 | −0.8228 | 1.3859  | −0.0364 |
| H15 | −1.2184 | 1.9159  | 0.8306  |
| H16 | −1.2226 | 1.8687  | −0.9287 |
| N17 | −1.2872 | −0.0023 | 0.0019  |
| C18 | −0.8205 | −0.7280 | −1.1816 |
| H19 | −1.2155 | −1.7439 | −1.1526 |
| H20 | −1.2180 | −0.2437 | −2.0741 |



H21 2.2460            0.0055            -0.0033

## 6. References

1. R. R. Milburn, K. McRae, J. Chan, J. Tedrow, R. Larsen, M. Faul, *Tetrahedron Lett.* **2009**, *50*, 870–872.
2. K. M. Maloney, J. Y. L. Chung, *J. Org. Chem.* **2009**, *74*, 7574–7576.
3. G. M. Coppola, *Synthesis* **1988**, 81–84.
4. X.-M. Tao, W.-F. Li, X. Ma, X.-M. Li, W.-Z. Fan, L.-F. Zhu, X.-M. Xie, Z.-G. Zhang, *J. Org. Chem.* **2012**, *77*, 8401–8409.
5. S.-F. Zhou, D.-P. Li, K. Liu, J.-P. Zou, O. T. Asekun, *J. Org. Chem.* **2015**, *80*, 1214–1220.
6. T. Konno, T. Takehana, M. Mishima, T. Ishihara, *J. Org. Chem.* **2006**, *71*, 3545–3550.
7. S. Martinez-Erro, A. Sanz-Marco, A. B. Gómez, A. Vázquez-Romero, M. S. G. Ahlquist, B. Martín-Matute, *J. Am. Chem. Soc.* **2016**, *138*, 13408–13414.
8. A. Sanz-Marco, G. Blay, C. Vila and J. R. Pedro, *Org. Lett.* **2016**, *18*, 3538–3541.
9. H. Kawai, Z. Yuan, T. Kitayama, E. Tokunaga and N. Shibata, *Angew. Chem. Int. Ed.* **2013**, *52*, 5575–5579.
10. P. Kwiatowski, A. Cholewiak, A. Kasztelan, *Org. Lett.* **2014**, *16*, 5930–5933.
11. S.-X. Wu, D. Pan, C.-Y. Cao, Q. Wang, F.-X. Chen, *Adv. Synth. Catal.* **2013**, *355*, 1917–1923.
12. The turbo Grignard reagent was used. See, A. Krasovskiy, P. Knochel, *Angew. Chem. Int. Ed.* **2004**, *43*, 3333–3336.
13. V. Ya. Sosnovskii, I. S. Ovsyannikov, I. A. Aleksandrova, *Z. Organich. Khim.* **1992**, *28*, 518–526.
14. Y.-C. Yang, Y.-A. Shen, X.-L. Wang, Y. Zhang, D.-W. Wang, X.-D. Shi, *Tetrahedron Lett.* **2016**, *57*, 2280–2282.
15. M. Sugiura, Y. Ashikar, M. Nakajima, *J. Org. Chem.* **2015**, *80*, 8830–8835.
16. V. Bizet, X. Pannecoucke, J.-L. Renaud and D. Cahard, *Adv. Synth. Cat.* **2013**, *355*, 1394–1402.
17. D. Cahard, V. Bizet, X.-Y. Dai, S. Gaillard, J.-L. Renaud, *J. Fluorine Chem.* **2013**, *155*, 78–82.
18. H. Ueki, T. Chiba, T. Kitazume, *J. Org. Chem.* **2006**, *71*, 3506–3511.

19. V. Bizet, X. Pannecoucke, J.-L. Renaud, D. Cahard, *Angew. Chem. Int. Ed.* **2012**, *51*, 6467–6470.
20. X.-L. Xia, M. Wu, R.-H. Jin, T.-Y. Cheng, G.-H. Liu, *Green Chem.* **2015**, *17*, 3916–3922.
21. M. Wu, L.-Y. Kong, K.-W. Wang, R.-H. Jin, T.-Y. Cheng, G.-H. Liu, *Cat. Sci. Technol.* **2015**, *5*, 1750–1757.
22. H.-X. Zheng, Z.-F. Xiao, C. A.-Z. Yao, Q.-Q. Li, X.-S. Ning, Y.-B. Kang, Y. Tang, *Org. Lett.* **2015**, *17*, 6102–6105.
23. E. J. Corey, R. K. Bakshi, S. Shibata, *J. Am Chem. Soc.* **1987**, *109*, 5551–5553.
24. E. J. Corey, C. J. Helal, *Angew. Chem. Int. Ed.* **1998**, *37*, 1986–2012.
25. L. R. Jefferies, S. P. Cook, *Tetrahedron* **2014**, *70*, 4204–4207.
26. S. Okusu, Y. Sugita, E. Tokunaga, N. Shibata, *Beilstein J. Org. Chem.* **2013**, *9*, 2189–2193.
27. D. J. Wilger, N. J. Gesmundo and D. A. Nicewicz, *Chem. Sci.* **2013**, *4*, 3160–3165.
28. T. Konno, S. Yamada, A. Tani, M. Nishida, T. Miyabe, T. Ishihara, *J. Fluorine Chem.* **2009**, *130*, 913–921.
29. Y. Li, Z.-S. Ye, T. M. Bellman, T. Chi, M.-J. Dai, *Org. Lett.* **2015**, *17*, 2186–2189.
30. A. Morigaki, T. Miyabe, K. Tsukade, S. Arimitsu, T. Ishihara, T. Konno, *Synthesis* **2013**, *45*, 101–105.
31. A. Morigaki, T. Tanaka, T. Miyabe, T. Ishihara, T. Konno, *Org. Biomol. Chem.* **2013**, *11*, 586–595.
32. Gaussian 09W (Rev. D.01), M. J. Frisch, G. W. Trucks, H. B. Schlegel, G. E. Scuseria, M. A. Robb, J. R. Cheeseman, G. Scalmani, V. Barone, B. Mennucci, G. A. Petersson, H. Nakatsuji, M. Caricato, X. Li, H. P. Hratchian, A. F. Izmaylov, J. Bloino, G. Zheng, J. L. Sonnenberg, M. Hada, M. Ehara, K. Toyota, R. Fukuda, J. Hasegawa, M. Ishida, T. Nakajima, Y. Honda, O. Kitao, H. Nakai, T. Vreven, J. A. Montgomery, Jr., J. E. Peralta, F. Ogliaro, M. Bearpark, J. J. Heyd, E. Brothers, K. N. Kudin, V. N. Staroverov, R. Kobayashi, J. Normand, K. Raghavachari, A. Rendell, J. C. Burant, S. S. Iyengar, J. Tomasi, M. Cossi, N. Rega, N. J. Millam, M. Klene, J. E. Knox, J. B. Cross, V. Bakken, C. Adamo, J. Jaramillo, R. Gomperts, R. E. Stratmann, O. Yazyev, A. J. Austin, R. Cammi, C. Pomelli, J. W. Ochterski, R. L. Martin, K. Morokuma, V. G. Zakrzewski, G. A. Voth, P. Salvador, J. J. Dannenberg, S. Dapprich, A. D. Daniels, Ö. Farkas, J. B. Foresman, J. V. Ortiz, J. Cioslowski, D. J. Fox, Gaussian: Wallingford, CT, 2009.
